# Supplementary material for: Tuning the electronic structure of gold cluster-assembled materials by altering organophosphine ligands
Source: Royal Society of Chemistry journal article supplement (doi:10.1039/d3cp04027e), 2024-01-01
Supplement: d3cp04027e1.pdf [file d3cp04027e1.pdf]

## **Tuning the electronic structure of gold cluster-assembled materials by altering organophosphine ligands**

Celina Sikorska<sup>1,2</sup> ✉ \*, Emma Vincent<sup>1</sup>, Andreas Schnepf<sup>3</sup>, Nicola Gaston<sup>1</sup>

<sup>1</sup> The MacDiarmid Institute for Advanced Materials and Nanotechnology,  
Department of Physics, The University of Auckland  
38 Princes Street, Auckland 1010, New Zealand

<sup>2</sup> Faculty of Chemistry, University of Gdańsk,  
Fahrenheit Union of Universities in Gdańsk, 80-308 Gdańsk, Poland

<sup>3</sup> Institut für Anorganische Chemie Universität Tübingen,  
Auf der Morgenstelle 18, D-72076 Tübingen, Germany

### **SUPPORTING INFORMATION**

---

\* Corresponding author: [celina.sikorska@auckland.ac.nz](mailto:celina.sikorska@auckland.ac.nz)

## 1. DFT geometry relaxation of $\text{Au}_{32}(\text{nBu}_3\text{P})_{12}\text{Cl}_8$ system

Table S 1. Lattice parameters ( $a$ ,  $b$ ,  $c$ , in Å;  $\alpha$ ,  $\beta$ ,  $\gamma$ , in degrees) and unit-cell volume (in Å<sup>3</sup>) for  $\text{Au}_{32}(\text{nBu}_3\text{P})_{12}\text{Cl}_8$  system as obtained by a full structure relaxation with the PBE-D3, PBEsol, and PBE functionals. The lattice parameters are compared to the corresponding experimental values (Exp.). The relative deviations (Dev, in %) are estimated as  $\text{Value}^{\text{exp}} - \text{Value}^{\text{theor}}$  divided by  $\text{Value}^{\text{exp}}$  (where  $\text{Value}^{\text{theor}}$  stands for the lattice parameter obtained at the PBE-D3 or PBEsol levels of theory).

|                                           | PBE-D3 | PBEsol | PBE   | Exp. <sup>1,2</sup> |
|-------------------------------------------|--------|--------|-------|---------------------|
| <b>a</b> (Å)                              | 32.86  | 33.20  | 34.02 | 33.29               |
| <b>Dev(a)</b> (in %)                      | -1.30  | -0.28  | 2.19  | -                   |
| <b>b</b> (Å)                              | 18.98  | 19.08  | 19.43 | 19.08               |
| <b>Dev(b)</b> (in %)                      | -0.53  | -0.03  | 1.80  | -                   |
| <b>c</b> (Å)                              | 19.31  | 19.40  | 19.78 | 19.34               |
| <b>Dev(c)</b> (in %)                      | -0.14  | 0.34   | 2.29  | -                   |
| <b><math>\alpha</math></b> (°)            | 63.38  | 63.34  | 63.28 | 63.44               |
| <b>Dev(<math>\alpha</math>)</b> (in %)    | -0.08  | -0.15  | -0.24 | -                   |
| <b><math>\beta</math></b> (°)             | 77.73  | 72.64  | 72.59 | 72.98               |
| <b>Dev(<math>\beta</math>)</b> (in %)     | 6.51   | -0.47  | -0.54 | -                   |
| <b><math>\gamma</math></b> (°)            | 77.73  | 77.75  | 77.80 | 78.30               |
| <b>Dev(<math>\gamma</math>)</b> (in %)    | -0.72  | -0.70  | -0.63 | -                   |
| <b>Unit cell volume</b> (Å <sup>3</sup> ) | 10237  | 10437  | 11097 | 10470               |
| <b>Dev(Unit cell volume)</b> (in %)       | -2.22  | -0.31  | 5.99  | -                   |

## 2. The density of states (DOS) of lattice structures and singlet state clusters

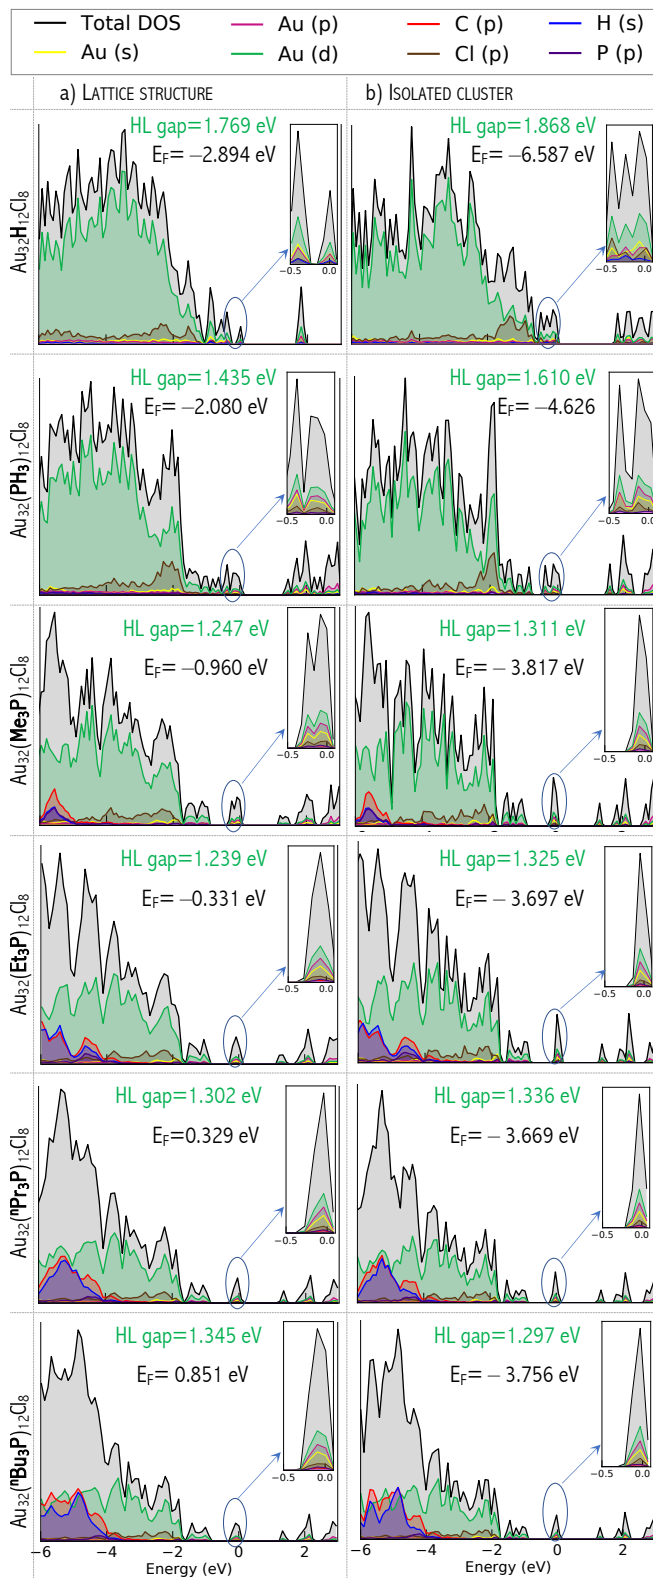

Figure S 1 The total density of states (TDOS) and partial density of states (PDOS) for (a) the lattice structure and (b) isolated  $Au_{32}H_{12}Cl_8$  and  $Au_{32}(R_3P)_{12}Cl_8$  singlet spin state clusters as obtained from PBE0-D3 and energy cutoff of 520 eV. Zero energy ( $E=0$ ) is set to the valence band maximum (VBM).

### 3. Molecular orbitals of isolated clusters

The equilibrium geometries of isolated clusters were obtained at the PBEsol theory level using the Vienna *ab initio* simulation package (VASP, Rev.6.3.2).<sup>3-6</sup> Subsequently, molecular orbitals were obtained using Gaussian 16 software<sup>7</sup> and PBE0-D3 method with the 6-31++G(d,p) basis sets at the equilibrium geometries optimized at the PBEsol level (incorporated in VASP Rev.6.3.2 software).<sup>3-6</sup> For the gold atoms, the Los Alamos National Laboratory (LANL) effective core potentials (ECP) with the appropriate valence basis set of double- $\zeta$  quality (denoted LANL2DZ)<sup>8,9</sup> was employed.

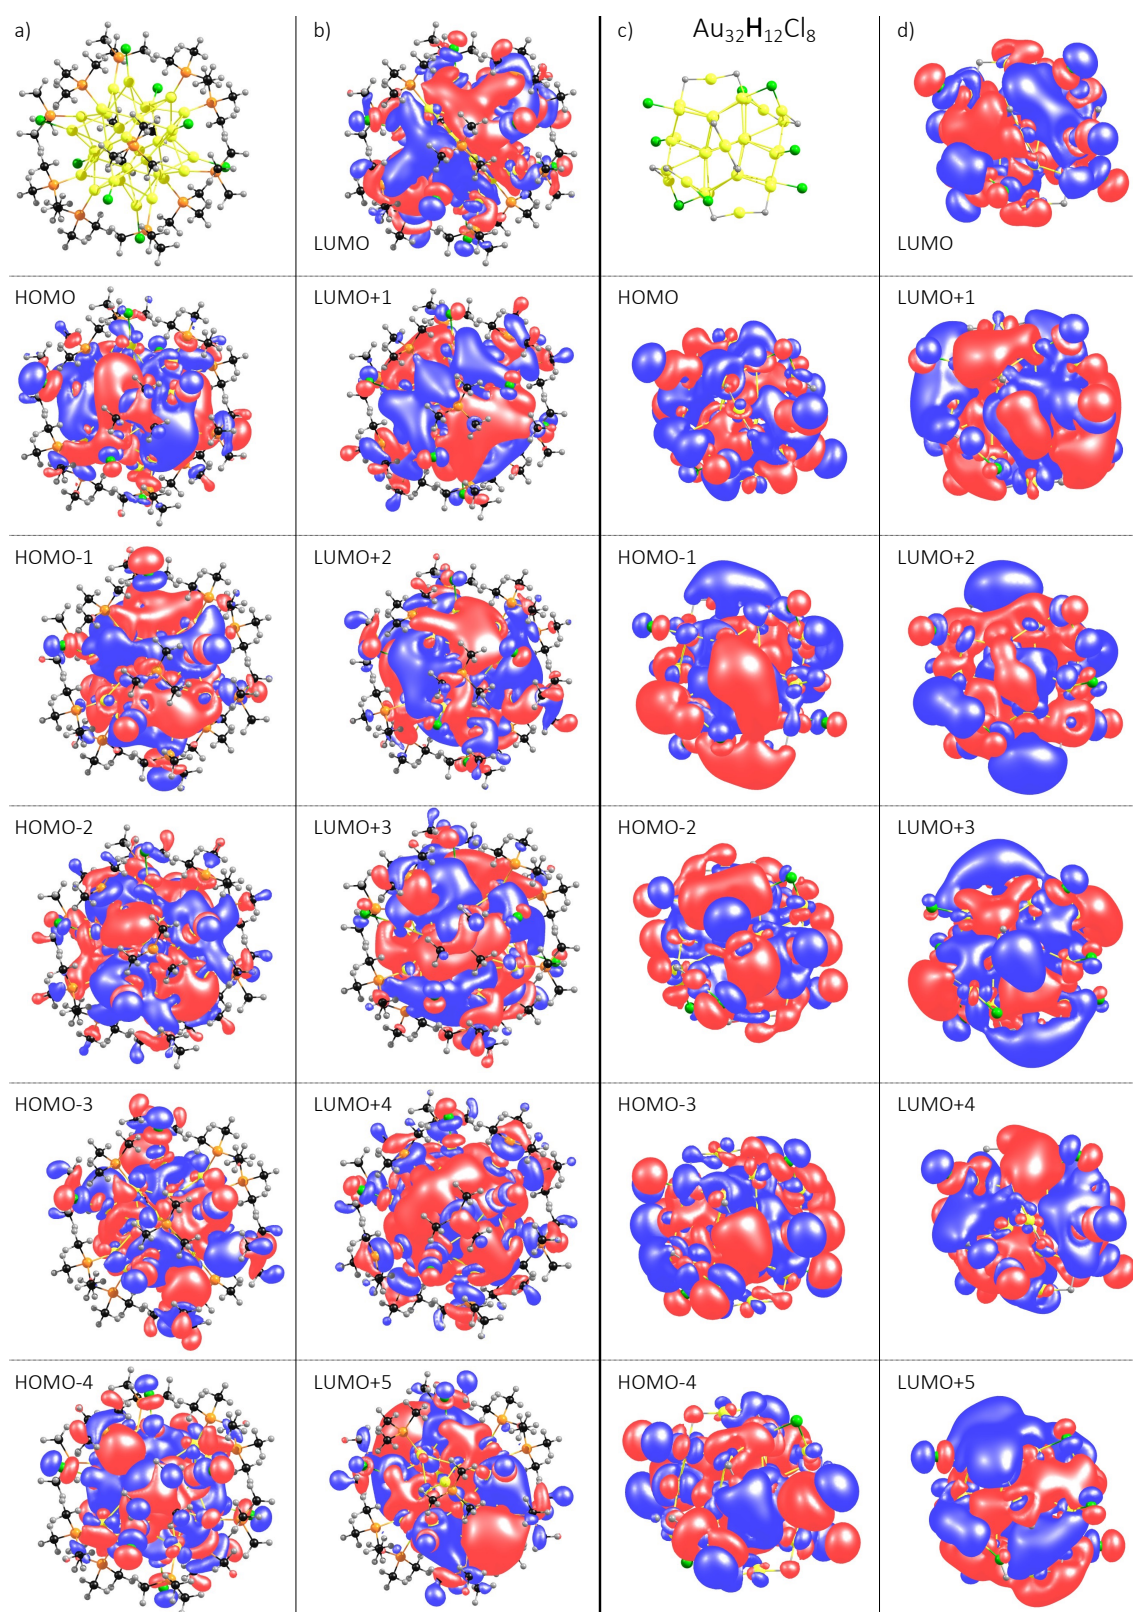

Figure S 2 The highest occupied molecular orbitals (HOMOs) and the lowest unoccupied molecular orbitals (LUMOs) of the singlet spin state (a-b)  $\text{Au}_{32}(\text{Me}_3\text{P})_{12}\text{Cl}_8$  and (c-d)  $\text{Au}_{32}\text{H}_{12}\text{Cl}_8$  isolated cluster as obtained from the PBE0-D3/6-31++G(d,p)+LanL2DZ using Gaussian 16 software.

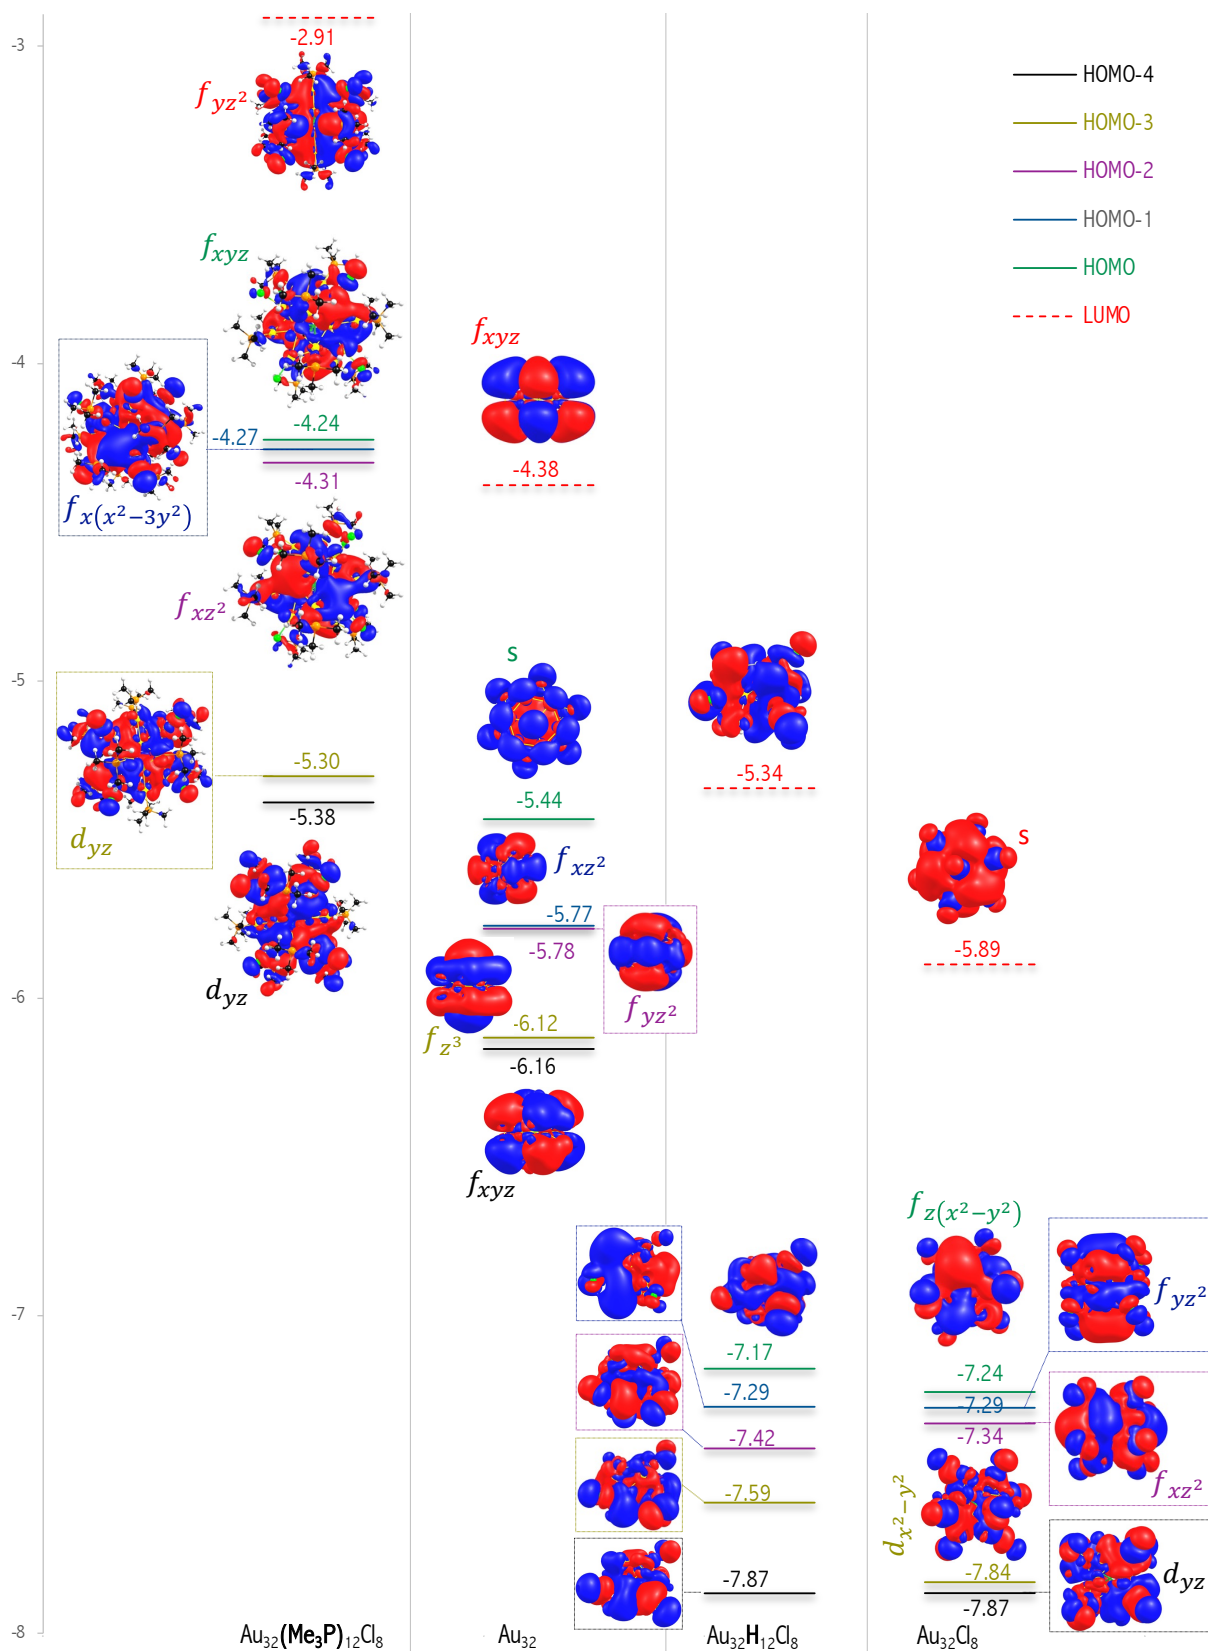

Figure S 3 The PBE0-D3/6-31++G(d,p)+LanL2DZ energy diagrams of  $Au_{32}(\text{Me}_3\text{P})_{12}\text{Cl}_8$  (first column),  $Au_{32}$  (second column),  $Au_{32}\text{H}_{12}\text{Cl}_8$  (third column), and  $Au_{32}\text{Cl}_8$  (fourth column). All equilibrium structures correspond to singlet spin states. The solid and red dashed lines represent the occupied and unoccupied energy levels, respectively.

#### 4. Au-Au distances in Au<sub>32</sub> fragment of bare and ligated clusters

We obtained the average Au-Au bond lengths (in Å) of the Au<sub>12</sub> core, Au<sub>20</sub> shell, and core-shell distances for Au<sub>32</sub>(Me<sub>3</sub>P)<sub>12</sub>Cl<sub>8</sub>, Au<sub>32</sub>, and Au<sub>32</sub>H<sub>12</sub>Cl<sub>8</sub> isolated clusters. Figure S 4 shows the average bond lengths of singlet spin state equilibria. The average bond lengths are overages of PBEsol/6-31++G(d,p)+LanL2DZ bond lengths (depicted in Table S 2). The structure of Au<sub>32</sub>(Me<sub>3</sub>P)<sub>12</sub>Cl<sub>8</sub> and Au<sub>32</sub>H<sub>12</sub>Cl<sub>8</sub> isolated clusters with representative bond lengths are depicted in Figure S 5.

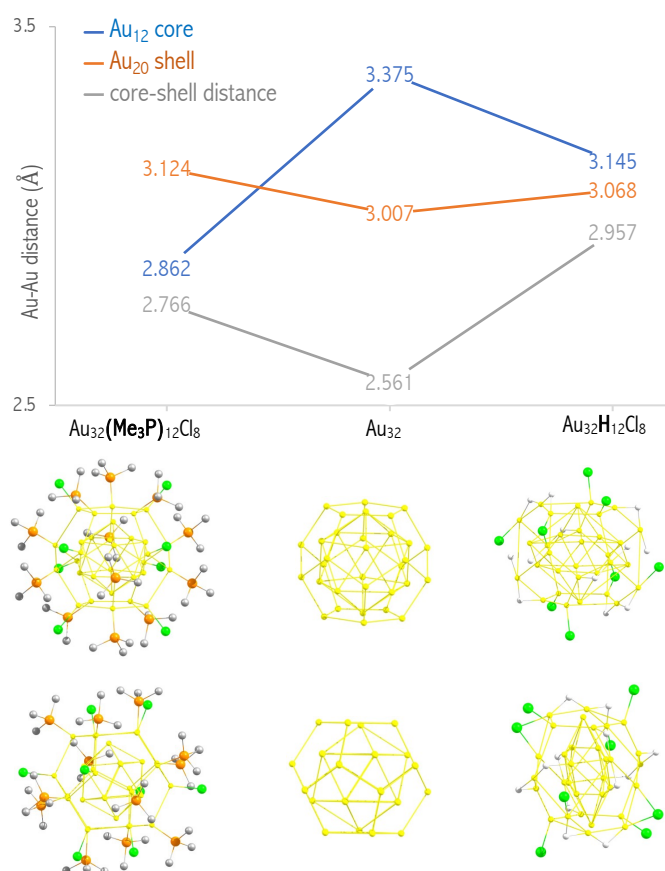

Figure S 4 The average Au-Au bond lengths (in Å) of Au<sub>12</sub> core (blue line), Au<sub>20</sub> shell (orange line), and core-shell distances (grey line) obtained for Au<sub>32</sub>(Me<sub>3</sub>P)<sub>12</sub>Cl<sub>8</sub> (left column), Au<sub>32</sub> (middle column), and Au<sub>32</sub>H<sub>12</sub>Cl<sub>8</sub> singlet spin state (right column). In the Au<sub>32</sub>(Me<sub>3</sub>P)<sub>12</sub>Cl<sub>8</sub> structure hydrogen atoms are omitted for clarity.

Table S 2. The PBEsol/6-31++G(d,p)+LanL2DZ Au-Au bond lengths (in Å) of Au<sub>12</sub> core (blue values), Au<sub>20</sub> shell (orange values), and core-shell distances (green values) for Au<sub>32</sub>(Me<sub>3</sub>P)<sub>12</sub>Cl<sub>8</sub>, Au<sub>32</sub>, and Au<sub>32</sub>H<sub>12</sub>Cl<sub>8</sub> isolated clusters.

| Au <sub>32</sub> (Me <sub>3</sub> P) <sub>12</sub> Cl <sub>8</sub> |       |       |      |          | Au <sub>32</sub> |        |        |      |          | Au <sub>32</sub> H <sub>12</sub> Cl <sub>8</sub> Singlet |        |        |      |          | Au <sub>32</sub> H <sub>12</sub> Cl <sub>8</sub> Triplet |        |        |      |          |
|--------------------------------------------------------------------|-------|-------|------|----------|------------------|--------|--------|------|----------|----------------------------------------------------------|--------|--------|------|----------|----------------------------------------------------------|--------|--------|------|----------|
| Name                                                               | Atom1 | Atom2 | Mult | Distance | Name             | Atom 1 | Atom 2 | Mult | Distance | Name                                                     | Atom 1 | Atom 2 | Mult | Distance | Name                                                     | Atom 1 | Atom 2 | Mult | Distance |
| AuAu                                                               | 10    | 12    | 2    | 2.822    | AuAu             | 10     | 12     | 2    | 2.723    | AuAu                                                     | 18     | 22     | 2    | 2.659    | AuAu                                                     | 1      | 5      | 1    | 2.7125   |
| AuAu                                                               | 8     | 12    | 6    | 2.828    | AuAu             | 9      | 11     | 1    | 2.724    | AuAu                                                     | 3      | 21     | 2    | 2.750    | AuAu                                                     | 17     | 21     | 1    | 2.7245   |
| AuAu                                                               | 1     | 3     | 2    | 2.831    | AuAu             | 8      | 10     | 3    | 2.787    | AuAu                                                     | 5      | 6      | 2    | 2.764    | AuAu                                                     | 2      | 6      | 1    | 2.7342   |
| AuAu                                                               | 1     | 8     | 2    | 2.839    | AuAu             | 2      | 12     | 2    | 2.792    | AuAu                                                     | 17     | 21     | 2    | 2.813    | AuAu                                                     | 18     | 22     | 1    | 2.7379   |
| AuAu                                                               | 6     | 9     | 2    | 2.844    | AuAu             | 8      | 12     | 1    | 3.713    | AuAu                                                     | 20     | 22     | 2    | 2.848    | AuAu                                                     | 1      | 6      | 2    | 2.7617   |
| AuAu                                                               | 2     | 10    | 2    | 2.857    | AuAu             | 6      | 12     | 1    | 3.716    | AuAu                                                     | 2      | 20     | 2    | 2.882    | AuAu                                                     | 6      | 21     | 4    | 2.7702   |
| AuAu                                                               | 3     | 5     | 2    | 2.861    | AuAu             | 2      | 4      | 1    | 3.732    | AuAu                                                     | 20     | 21     | 2    | 2.883    | AuAu                                                     | 20     | 22     | 3    | 2.794    |
| AuAu                                                               | 3     | 8     | 2    | 2.875    | AuAu             | 3      | 8      | 1    | 3.741    | AuAu                                                     | 17     | 18     | 2    | 2.901    | AuAu                                                     | 4      | 22     | 1    | 2.8413   |
| AuAu                                                               | 2     | 5     | 2    | 2.881    | AuAu             | 1      | 3      | 1    | 3.755    | AuAu                                                     | 19     | 22     | 2    | 2.927    | AuAu                                                     | 6      | 20     | 1    | 2.8547   |
| AuAu                                                               | 5     | 11    | 2    | 2.900    | AuAu             | 6      | 9      | 1    | 3.763    | AuAu                                                     | 19     | 20     | 2    | 3.264    | AuAu                                                     | 20     | 21     | 1    | 3.0499   |
| AuAu                                                               | 5     | 7     | 2    | 2.912    | AuAu             | 5      | 11     | 1    | 3.767    | AuAu                                                     | 5      | 18     | 2    | 3.938    | AuAu                                                     | 4      | 5      | 1    | 3.0735   |
| AuAu                                                               | 2     | 12    | 2    | 2.965    | AuAu             | 2      | 10     | 2    | 3.769    | AuAu                                                     | 3      | 17     | 2    | 4.174    | AuAu                                                     | 4      | 17     | 1    | 3.2198   |
| AuAu                                                               | 15    | 28    | 2    | 2.885    | AuAu             | 5      | 10     | 1    | 3.794    | AuAu                                                     | 18     | 19     | 2    | 4.430    | AuAu                                                     | 3      | 21     | 1    | 3.2408   |
| AuAu                                                               | 19    | 21    | 2    | 2.904    | AuAu             | 4      | 7      | 1    | 3.810    | AuAu                                                     | 31     | 32     | 4    | 2.648    | AuAu                                                     | 1      | 20     | 1    | 3.2579   |
| AuAu                                                               | 14    | 30    | 2    | 2.937    | AuAu             | 7      | 11     | 1    | 3.830    | AuAu                                                     | 12     | 13     | 2    | 2.664    | AuAu                                                     | 5      | 19     | 2    | 3.2698   |
| AuAu                                                               | 24    | 26    | 2    | 2.974    | AuAu             | 18     | 20     | 1    | 2.774    | AuAu                                                     | 27     | 28     | 2    | 2.680    | AuAu                                                     | 1      | 2      | 1    | 3.3037   |
| AuAu                                                               | 29    | 31    | 2    | 3.067    | AuAu             | 13     | 15     | 4    | 2.776    | AuAu                                                     | 14     | 16     | 2    | 2.682    | AuAu                                                     | 2      | 21     | 1    | 3.8692   |
| AuAu                                                               | 18    | 20    | 2    | 3.118    | AuAu             | 20     | 22     | 2    | 2.779    | AuAu                                                     | 8      | 9      | 2    | 2.718    | AuAu                                                     | 5      | 18     | 1    | 3.9074   |
| AuAu                                                               | 17    | 25    | 2    | 3.122    | AuAu             | 29     | 31     | 1    | 2.780    | AuAu                                                     | 23     | 24     | 2    | 2.748    | AuAu                                                     | 3      | 6      | 1    | 3.939    |
| AuAu                                                               | 23    | 27    | 2    | 3.148    | AuAu             | 30     | 32     | 4    | 2.782    | AuAu                                                     | 10     | 32     | 2    | 2.757    | AuAu                                                     | 4      | 20     | 1    | 3.962    |
| AuAu                                                               | 25    | 29    | 2    | 3.153    | AuAu             | 14     | 16     | 1    | 2.791    | AuAu                                                     | 8      | 30     | 2    | 2.835    | AuAu                                                     | 19     | 22     | 1    | 4.01     |
| AuAu                                                               | 13    | 15    | 2    | 3.204    | AuAu             | 15     | 17     | 3    | 2.794    | AuAu                                                     | 26     | 27     | 2    | 2.862    | AuAu                                                     | 6      | 22     | 1    | 4.0175   |
| AuAu                                                               | 20    | 31    | 2    | 3.237    | AuAu             | 23     | 25     | 2    | 2.797    | AuAu                                                     | 11     | 23     | 2    | 3.537    | AuAu                                                     | 3      | 4      | 1    | 4.5576   |
| AuAu                                                               | 15    | 17    | 2    | 3.249    | AuAu             | 16     | 18     | 1    | 2.799    | AuAu                                                     | 13     | 15     | 2    | 3.579    | AuAu                                                     | 7      | 15     | 2    | 2.6377   |
| AuAu                                                               | 27    | 31    | 1    | 3.264    | AuAu             | 23     | 27     | 4    | 2.805    | AuAu                                                     | 7      | 15     | 2    | 3.676    | AuAu                                                     | 23     | 31     | 1    | 2.6452   |
| AuAu                                                               | 28    | 32    | 1    | 3.265    | AuAu             | 18     | 26     | 1    | 2.813    | AuAu                                                     | 9      | 10     | 2    | 3.859    | AuAu                                                     | 15     | 16     | 1    | 2.6515   |
| AuAu                                                               | 21    | 23    | 2    | 3.288    | AuAu             | 2      | 18     | 2    | 2.635    | AuAu                                                     | 28     | 30     | 2    | 4.124    | AuAu                                                     | 31     | 32     | 1    | 2.6535   |
| AuAu                                                               | 14    | 21    | 2    | 3.315    | AuAu             | 5      | 14     | 3    | 2.637    | AuAu                                                     | 4      | 26     | 2    | 2.637    | AuAu                                                     | 12     | 13     | 1    | 2.6728   |
| AuAu                                                               | 1     | 13    | 2    | 2.687    | AuAu             | 2      | 14     | 1    | 2.643    | AuAu                                                     | 18     | 25     | 4    | 2.693    | AuAu                                                     | 8      | 9      | 1    | 2.6748   |
| AuAu                                                               | 12    | 24    | 2    | 2.689    | AuAu             | 8      | 17     | 2    | 2.646    | AuAu                                                     | 4      | 14     | 2    | 2.704    | AuAu                                                     | 30     | 32     | 1    | 2.6799   |
| AuAu                                                               | 11    | 31    | 2    | 2.696    | AuAu             | 6      | 28     | 1    | 2.648    | AuAu                                                     | 21     | 23     | 4    | 2.722    | AuAu                                                     | 28     | 29     | 1    | 2.6864   |
| AuAu                                                               | 2     | 18    | 2    | 2.713    | AuAu             | 7      | 27     | 1    | 2.649    | AuAu                                                     | 3      | 14     | 2    | 2.743    | AuAu                                                     | 24     | 25     | 1    | 2.6883   |
| AuAu                                                               | 6     | 15    | 2    | 2.722    | AuAu             | 1      | 13     | 1    | 2.652    | AuAu                                                     | 3      | 12     | 2    | 2.755    | AuAu                                                     | 18     | 29     | 1    | 2.774    |
| AuAu                                                               | 5     | 27    | 4    | 2.724    | AuAu             | 7      | 18     | 1    | 2.656    | AuAu                                                     | 3      | 11     | 2    | 2.766    | AuAu                                                     | 27     | 28     | 1    | 2.7839   |
| AuAu                                                               | 3     | 19    | 2    | 2.727    | AuAu             | 4      | 26     | 1    | 2.700    | AuAu                                                     | 10     | 21     | 2    | 2.770    | AuAu                                                     | 16     | 26     | 1    | 2.8235   |
| AuAu                                                               | 9     | 29    | 2    | 2.743    | AuAu             | 10     | 21     | 2    | 2.703    | AuAu                                                     | 22     | 28     | 2    | 2.799    | AuAu                                                     | 10     | 32     | 1    | 2.8286   |
| AuAu                                                               | 3     | 21    | 2    | 2.750    | AuAu             | 10     | 30     | 1    | 2.707    | AuAu                                                     | 20     | 32     | 2    | 2.811    | AuAu                                                     | 10     | 11     | 2    | 2.8633   |



|      |    |    |   |       |      |    |    |   |       |      |    |    |   |       |      |    |    |        |        |
|------|----|----|---|-------|------|----|----|---|-------|------|----|----|---|-------|------|----|----|--------|--------|
| AuAu | 8  | 28 | 4 | 2.758 | AuAu | 11 | 23 | 2 | 2.709 | AuAu | 22 | 32 | 2 | 2.836 | AuAu | 26 | 27 | 1      | 2.8674 |
| AuAu | 10 | 21 | 2 | 2.759 | AuAu | 3  | 25 | 1 | 2.714 | AuAu | 17 | 25 | 2 | 2.839 | AuAu | 14 | 24 | 1      | 2.9438 |
| AuAu | 10 | 19 | 4 | 2.761 | AuAu | 12 | 24 | 4 | 2.716 | AuAu | 18 | 26 | 2 | 2.852 | AuAu | 8  | 30 | 1      | 2.9463 |
| AuAu | 7  | 18 | 2 | 2.773 | AuAu | 4  | 20 | 3 | 2.720 | AuAu | 17 | 23 | 2 | 2.921 | AuAu | 23 | 24 | 1      | 2.9504 |
| AuAu | 2  | 30 | 2 | 2.777 | AuAu | 2  | 30 | 1 | 2.730 | AuAu | 5  | 16 | 2 | 2.938 | AuAu | 7  | 8  | 1      | 2.9528 |
| AuAu | 10 | 32 | 1 | 2.779 | AuAu | 5  | 23 | 2 | 2.733 | AuAu | 2  | 12 | 2 | 2.954 | AuAu | 10 | 31 | 1      | 3.1619 |
| AuAu | 10 | 14 | 5 | 2.779 | AuAu | 7  | 16 | 1 | 2.735 | AuAu | 4  | 25 | 2 | 3.013 | AuAu | 7  | 27 | 3      | 3.1651 |
| AuAu | 8  | 32 | 2 | 2.784 | AuAu | 2  | 26 | 1 | 2.738 | AuAu | 11 | 21 | 2 | 3.221 | AuAu | 15 | 26 | 1      | 3.2053 |
| AuAu | 4  | 24 | 2 | 2.785 | AuAu | 8  | 15 | 2 | 2.741 | AuAu | 22 | 29 | 2 | 3.278 | AuAu | 11 | 23 | 1      | 3.2247 |
| AuAu | 11 | 29 | 4 | 2.792 | AuAu | 7  | 20 | 4 | 2.744 | AuAu | 21 | 31 | 2 | 3.305 | AuAu | 28 | 30 | 1      | 3.474  |
| AuAu | 1  | 25 | 2 | 2.799 | AuAu | 10 | 32 | 2 | 2.746 | AuAu | 22 | 30 | 2 | 3.360 | AuAu | 12 | 14 | 1      | 3.524  |
| AuAu | 7  | 20 | 4 | 2.808 | AuAu | 6  | 15 | 1 | 2.747 | AuAu | 22 | 31 | 2 | 3.394 | AuAu | 15 | 27 | 1      | 3.9771 |
| AuAu | 6  | 22 | 2 | 2.810 | AuAu | 5  | 16 | 2 | 2.748 | AuAu | 2  | 11 | 2 | 3.409 | AuAu | 19 | 27 | 1      | 2.6295 |
| AuAu | 6  | 13 | 2 | 2.815 | AuAu | 7  | 31 | 2 | 2.752 | AuAu | 1  | 13 | 2 | 3.515 | AuAu | 2  | 9  | 1      | 2.661  |
| AuAu | 12 | 28 | 4 | 2.849 | AuAu | 5  | 21 | 2 | 2.753 | AuAu | 5  | 8  | 2 | 3.622 | AuAu | 18 | 25 | 1      | 2.6624 |
|      |    |    |   |       | AuAu | 11 | 29 | 2 | 2.756 | AuAu | 4  | 24 | 2 | 2.782 | AuAu | 4  | 26 | 1      | 2.6641 |
|      |    |    |   |       | AuAu | 10 | 19 | 1 | 2.758 | AuAu | 1  | 8  | 2 | 2.815 | AuAu | 10 | 20 | 2      | 2.6687 |
|      |    |    |   |       | AuAu | 6  | 22 | 1 | 2.760 | AuAu | 2  | 13 | 2 | 2.829 | AuAu | 3  | 12 | 1      | 2.6841 |
|      |    |    |   |       | AuAu | 11 | 25 | 1 | 2.766 |      |    |    |   | AuAu  | 19   | 28 | 1  | 2.7017 |        |
|      |    |    |   |       | AuAu | 3  | 23 | 2 | 2.769 |      |    |    |   | AuAu  | 20   | 30 | 2  | 2.7317 |        |
|      |    |    |   |       | AuAu | 12 | 30 | 2 | 2.771 |      |    |    |   | AuAu  | 6    | 16 | 1  | 2.7487 |        |
|      |    |    |   |       | AuAu | 9  | 20 | 1 | 2.773 |      |    |    |   | AuAu  | 22   | 32 | 1  | 2.753  |        |
|      |    |    |   |       | AuAu | 12 | 28 | 1 | 2.784 |      |    |    |   | AuAu  | 20   | 32 | 4  | 2.7566 |        |
|      |    |    |   |       | AuAu | 8  | 10 | 3 | 2.787 |      |    |    |   | AuAu  | 4    | 16 | 1  | 2.7635 |        |
|      |    |    |   |       | AuAu | 9  | 13 | 4 | 2.790 |      |    |    |   | AuAu  | 22   | 28 | 1  | 2.7648 |        |
|      |    |    |   |       | AuAu | 3  | 17 | 1 | 2.798 |      |    |    |   | AuAu  | 21   | 24 | 1  | 2.7676 |        |
|      |    |    |   |       |      |    |    |   |       |      |    |    |   | AuAu  | 22   | 30 | 2  | 2.7896 |        |
|      |    |    |   |       |      |    |    |   |       |      |    |    |   | AuAu  | 1    | 8  | 2  | 2.7982 |        |
|      |    |    |   |       |      |    |    |   |       |      |    |    |   | AuAu  | 17   | 24 | 1  | 2.8023 |        |
|      |    |    |   |       |      |    |    |   |       |      |    |    |   | AuAu  | 6    | 14 | 1  | 2.8038 |        |
|      |    |    |   |       |      |    |    |   |       |      |    |    |   | AuAu  | 18   | 26 | 1  | 2.8133 |        |
|      |    |    |   |       |      |    |    |   |       |      |    |    |   | AuAu  | 2    | 12 | 1  | 2.8176 |        |
|      |    |    |   |       |      |    |    |   |       |      |    |    |   | AuAu  | 18   | 28 | 1  | 2.8345 |        |
|      |    |    |   |       |      |    |    |   |       |      |    |    |   | AuAu  | 2    | 10 | 2  | 2.8442 |        |
|      |    |    |   |       |      |    |    |   |       |      |    |    |   | AuAu  | 4    | 24 | 2  | 2.8464 |        |
|      |    |    |   |       |      |    |    |   |       |      |    |    |   | AuAu  | 4    | 25 | 1  | 2.8593 |        |
|      |    |    |   |       |      |    |    |   |       |      |    |    |   | AuAu  | 8    | 20 | 1  | 2.8714 |        |
|      |    |    |   |       |      |    |    |   |       |      |    |    |   | AuAu  | 3    | 14 | 1  | 2.9184 |        |
|      |    |    |   |       |      |    |    |   |       |      |    |    |   | AuAu  | 19   | 30 | 1  | 2.9221 |        |
|      |    |    |   |       |      |    |    |   |       |      |    |    |   | AuAu  | 21   | 23 | 1  | 2.9247 |        |
|      |    |    |   |       |      |    |    |   |       |      |    |    |   | AuAu  | 1    | 15 | 1  | 2.927  |        |
|      |    |    |   |       |      |    |    |   |       |      |    |    |   | AuAu  | 5    | 7  | 1  | 2.9326 |        |

|      |    |    |   |        |
|------|----|----|---|--------|
| AuAu | 17 | 31 | 1 | 2.945  |
| AuAu | 11 | 21 | 1 | 2.9781 |
| AuAu | 5  | 27 | 1 | 2.9953 |
| AuAu | 22 | 29 | 1 | 3.0098 |
| AuAu | 21 | 31 | 1 | 3.0149 |
| AuAu | 6  | 13 | 1 | 3.0179 |
| AuAu | 5  | 15 | 1 | 3.0263 |
| AuAu | 3  | 24 | 1 | 3.0479 |
| AuAu | 8  | 19 | 1 | 3.1067 |
| AuAu | 17 | 25 | 1 | 3.1121 |
| AuAu | 1  | 9  | 1 | 3.1307 |
| AuAu | 17 | 23 | 1 | 3.2304 |
| AuAu | 1  | 7  | 1 | 3.2343 |
| AuAu | 1  | 13 | 1 | 3.2767 |
| AuAu | 17 | 29 | 1 | 3.2925 |
| AuAu | 5  | 16 | 1 | 3.3804 |
| AuAu | 21 | 32 | 1 | 3.4038 |
| AuAu | 7  | 19 | 1 | 3.4084 |
| AuAu | 3  | 23 | 1 | 3.4391 |
| AuAu | 5  | 30 | 1 | 3.5426 |
| AuAu | 1  | 16 | 1 | 3.5871 |

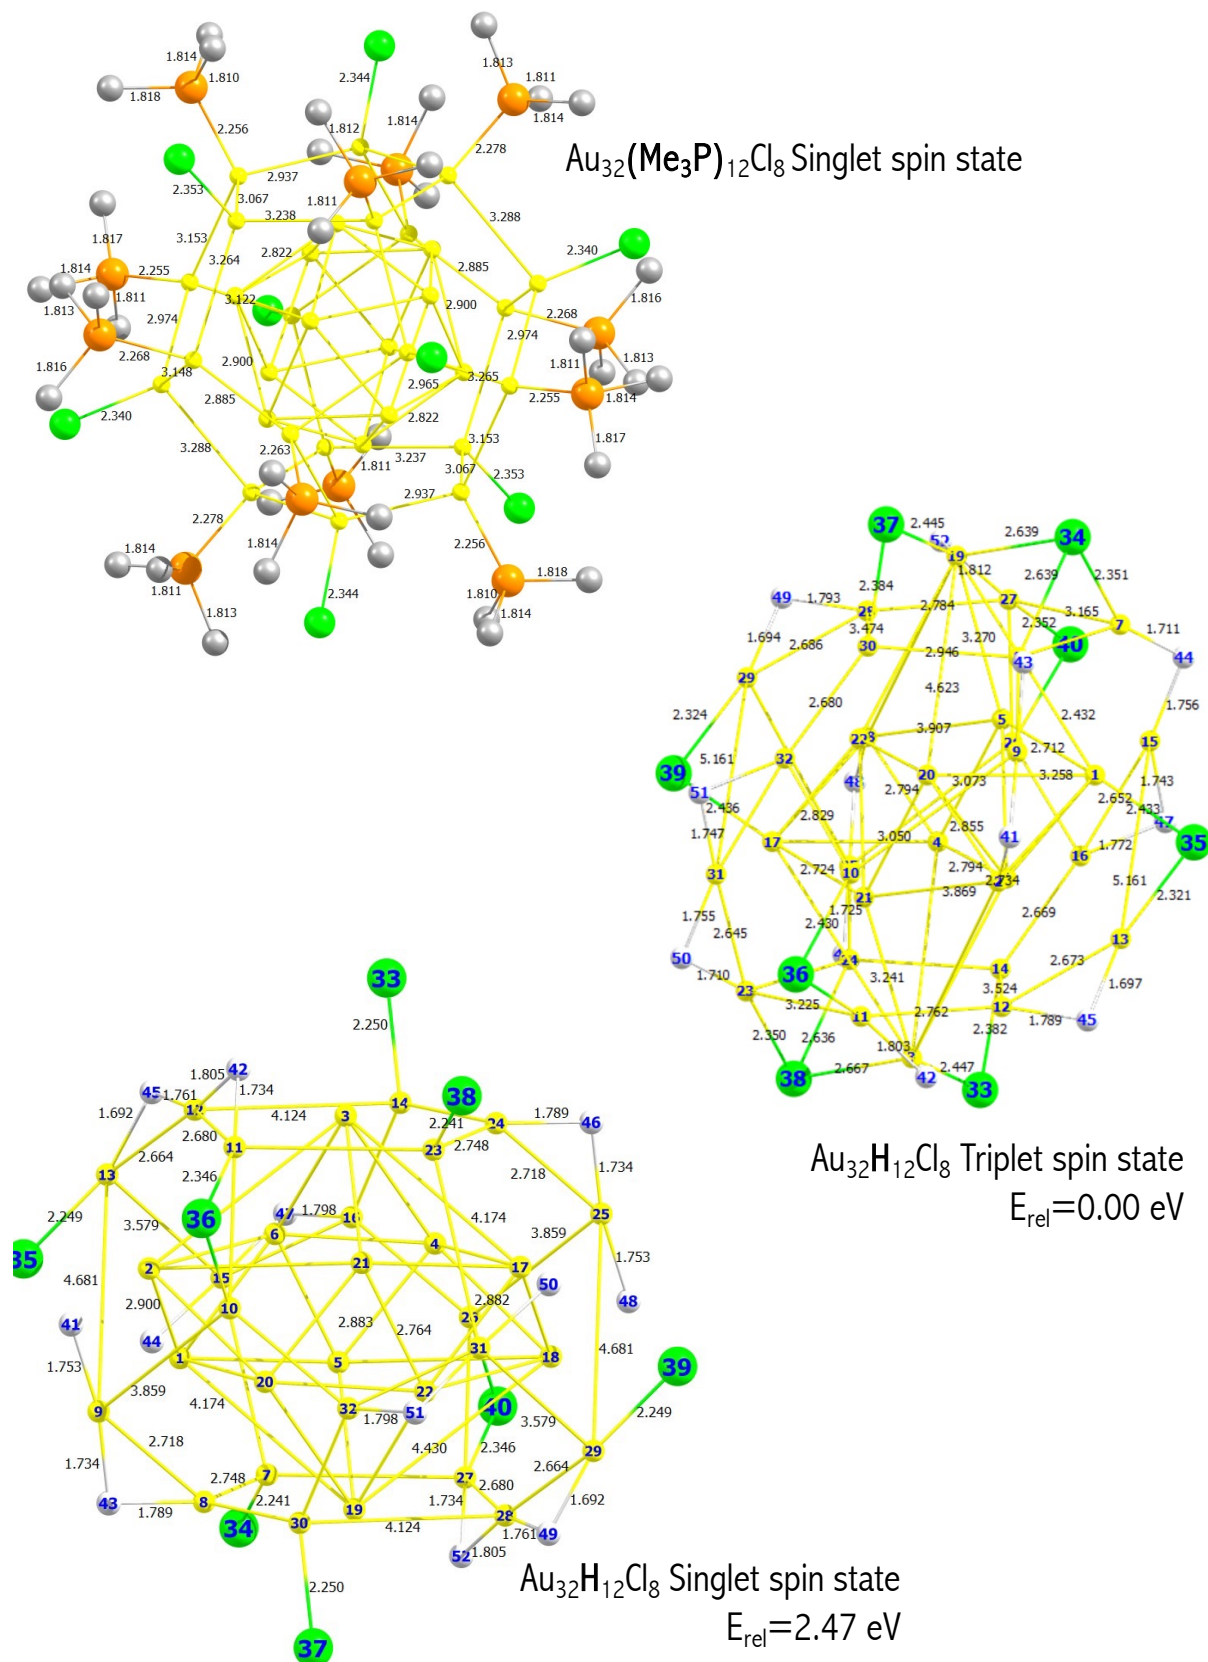

Figure S 5 The PBEsol/6-31++G(d,p)+LanL2DZ structures of  $\text{Au}_{32}(\text{Me}_3\text{P})_{12}\text{Cl}_8$  (top),  $\text{Au}_{32}\text{H}_{12}\text{Cl}_8$  triplet spin state (middle), and  $\text{Au}_{32}\text{H}_{12}\text{Cl}_8$  singlet spin state (bottom) isolated clusters with representative bond lengths (in Å). For the  $\text{Au}_{32}(\text{Me}_3\text{P})_{12}\text{Cl}_8$  structure, hydrogen atoms are omitted for clarity. Atoms are coloured yellow (Au), grey (C), green (Cl), white (H), and orange (P). For the  $\text{Au}_{32}\text{H}_{12}\text{Cl}_8$  structures, the PBE0-D3 adiabatic relative energies ( $E_{\text{rel}}$  in eV) are provided.

## 5. Topological analysis of the bonding

We decided to incorporate into our analysis a delocalized view of electrons in molecules that is at variance with the chemically intuitive notion of localized bonds and lone pairs inherited from Lewis. To introduce a localized view of electrons within studied systems, we used the Electron Localization Function (ELF)<sup>10</sup> and the Quantum Theory of Atoms in Molecules (QTAIM).<sup>11</sup> The ELF is a mathematical function that relates to the probability of finding an electron pair in the vicinity of a particular point in space. It is normalized so that  $0 \leq \text{ELF} \leq 1$  and increases with the increasing probability of finding a localized electron pair. The QTAIM is a topological analysis of the properties of the electron density ( $\rho$ ), its gradient ( $\nabla\rho$ ), and its Laplacian ( $\nabla^2\rho$ ) in the three-dimensional Euclidean space. In the QTAIM approach, atoms emerge as non-overlapping regions of space (atomic basins) defined by their kinetic energies, and separated by interatomic surfaces.<sup>11</sup> In general, bonded atoms are connected by a bond path crossing a bond critical point (BCP), i.e. a saddle point of the electron density.<sup>12</sup> Although there is no strict equivalence between BCPs and chemical bonds, their absence can be used as a metric to determine a lack of covalent bond.<sup>12</sup>

We used the VASP package (Rev.6.3.2)<sup>3-6</sup> and Critic2 software (Rev.3)<sup>13</sup> to estimate ELF and BCP values. The obtained results were visualized with the VESTA software.

## 6. Electron affinity and ionization energy of isolated ligands

The adiabatic electron affinity (AEA) of ligands was estimated as the electronic energy differences between the neutral ( $E_{\text{neu}}$ ) and anion ( $E_{\text{neu}}$ ) at each equilibrium geometry ( $r_{e,0}$  and  $r_{e,-}$ , respectively, Equation S 1). We calculated the adiabatic ionization energy (AIE) by subtracting the total electronic energies of the cation ( $E_{\text{cat}}$ ) and neutral ( $E_{\text{neu}}$ ) at each equilibrium geometry ( $r_{e,+}$  and  $r_{e,-}$ , respectively, Equation S 2). The  $\text{AEA}^{\text{CCSD(T)}}$  and  $\text{AIE}^{\text{CCSD(T)}}$  values were obtained at the CCSD(T)/6-311++G(3df,3pd) level at the equilibrium geometries optimized at the MP2/6-311++G(d,p) theory level. The  $\text{AIE}^{\text{PBE0-D3}}$ ,  $\text{VEA}^{\text{PBE0-D3}}$ , and  $\text{AEA}^{\text{PBE0-D3}}$  were calculated at the PBE0-D3/6-31++G(d,p) theory level.

$$\text{AEA} = E_{\text{neu}}(r_{e,0}) - E_{\text{an}}(r_{e,-}) \quad \text{Equation S 1}$$

$$\text{AIE} = E_{\text{cat}}(r_{e,+}) - E_{\text{neu}}(r_{e,0}) \quad \text{Equation S 2}$$

Table S 3 Adiabatic ionization energy (AIE) of ligands obtained at the PBE0-D3/6-31+G(d,p) ( $AIE^{PBE0-D3}$  in eV) and CCSD(T)/6-311+G(3df,3pd) ( $AIE^{CCSD(T)}$  in eV) levels. The PBE0-D3 vertical electron affinity ( $VEA^{PBE0-D3}$  in eV), adiabatic electron affinity (AEA, obtained at the PBE0-D3/6-31+G(d,p) ( $VEA^{PBE0-D3}$  in eV) and CCSD(T)/6-311+G(3df,3pd) ( $VEA^{CCSD(T)}$  in eV) theory levels). Experimental values of vertical ionization energy ( $VIE^{exp}$ ) and electron affinity ( $EA^{exp}$ ) are also provided for comparison.<sup>14</sup>

| Ligand                         | $AIE^{PBE0-D3}$ | $AIE^{CCSD(T)}$ | $AIE^{exp}$ 14 | $VIE^{exp}$ 14 | $VEA^{PBE0-D3}$ | $AEA^{PBE0-D3}$ | $AEA^{CCSD(T)}$ | $EA^{exp}$ |
|--------------------------------|-----------------|-----------------|----------------|----------------|-----------------|-----------------|-----------------|------------|
| H                              | 13.63           | 13.60           | 13.60          | -              | 0.60            | 0.60            | 0.65            | 0.755      |
| PH <sub>3</sub>                | 9.70            | 9.75            | 9.87±0.01      | 10.59±0.05     | -0.70           | -0.69           | -0.83           | -          |
| PMe <sub>3</sub>               | 7.67            | 7.82            | 8.1±0.1        | 8.6±0.1        | -0.67           | -0.66           | -0.76           | -          |
| PEt <sub>3</sub>               | 7.38            | 7.56            | 7.6            | 8.31           | -0.62           | -0.63           | -0.93           | -          |
| <sup>n</sup> PPr <sub>3</sub>  | 7.27            | 7.31            | -              | -              | -0.57           | -0.65           | -0.99           | -          |
| <sup>n</sup> Bu <sub>3</sub> P | 7.20            | 7.25            | 7.5            | 8.00           | -0.54           | -0.79           | -0.79           | -          |

In Figure S 6a we shown AIE and AEA values of ligands obtained at the CCSD(T) level of theory. The only issue we want to raise considering the comparison of the CCSD(T) values to PBE0-D3 ones (provided in Table S 3) is the observation that the AIE and AEA values are underestimated at the PBE0-D3 level of theory (with respect to CCSD(T) values).

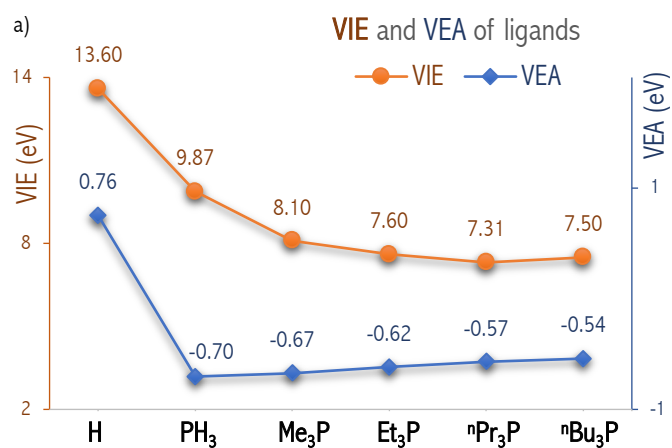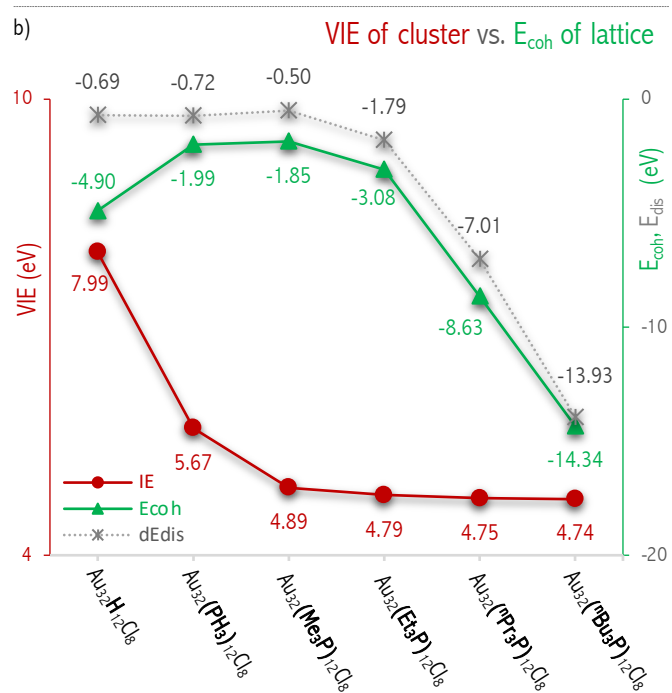

Figure S 6 a) The adiabatic electron affinity (AEA, blue diamonds) and adiabatic ionization energy (AIE, orange circles) values of ligands as obtained from CCSD(T)/6-311++G(3df,3pd) method at the equilibrium geometries optimized at the MP2/6-311++G(d,p). b) The PBE0-D3 ionization energy of cluster (IE in eV) and PBE0-D3 cohesive energy of Au<sub>32</sub>(R<sub>3</sub>P)<sub>12</sub>Cl<sub>8</sub> lattice ( $E_{\text{coh}}$  in eV).

## 7. Vertical ionization energy (VIE) and vertical electron affinity (VEA) values of singlet spin state gold clusters

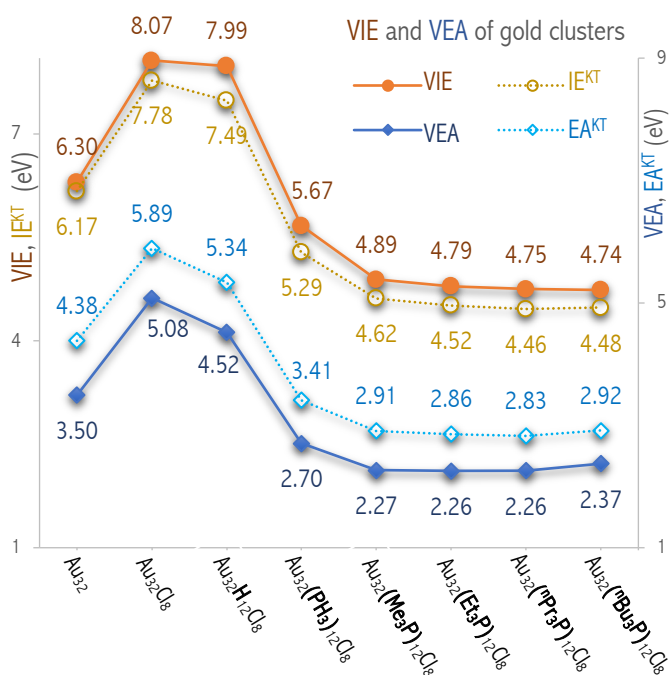

Figure S 7 The vertical ionization energy (VIE) and vertical electron affinity (VEA) values of gold clusters as obtained from the PBE0-D3/6-31++G(d,p)+LanL2DZ method. The energies have been estimated at the singlet spin state equilibrium neutral geometries for all systems.

## 8. Cohesive energy of lattice

Figure S2 shows the cohesive energy of studied lattices obtained at the PBEsol (navy circles), PBE0 (orange circles), PBE0-D3 (green triangles), and HSE06-D3 (purple diamonds) levels of theory. Dispersion energy ( $E_{\text{dis}}$ , grey stars in Figure S 8) has been obtained as a difference between cohesive energies obtained at the PBE0-D3 and PBE0 theory levels ( $E_{\text{dis}} = E_{\text{coh}}^{\text{PBE0-D3}} - E_{\text{coh}}^{\text{PBE0}}$ ).

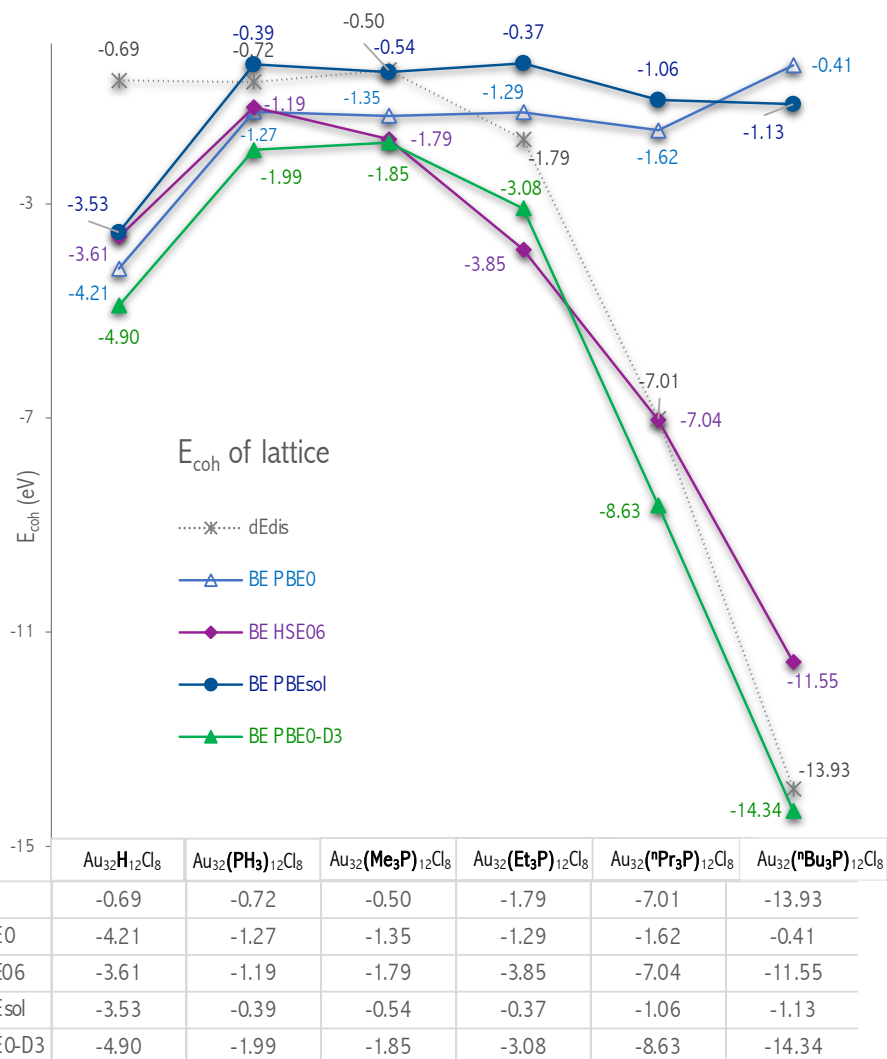

Figure S 8 a) The cohesive energy ( $E_{coh}$ ) of superatomic lattice obtained at the PBEsol (navy circles), PBE0 (blue triangles), PBE0-D3 (green triangles), and HSE06-D3 (purple diamonds) levels of theory. Dispersion energy ( $E_{dis}$ , grey stars) has been obtained as a difference between cohesive energies obtained at the PBE0-D3 and PBE0 levels. The isolated gold clusters at the equilibrium geometry of singlet spin state.

## 9. Lattice parameters and atomic coordinates of the ligand-protected gold clusters

|                                                                                                                           |    |
|---------------------------------------------------------------------------------------------------------------------------|----|
| POSCAR FILE OF THE Au <sub>32</sub> ( <sup>n</sup> Bu <sub>3</sub> P) <sub>12</sub> Cl <sub>8</sub> ASSEMBLY SYSTEM ..... | 17 |
| POSCAR FILE OF THE Au <sub>32</sub> ( <sup>n</sup> Pr <sub>3</sub> P) <sub>12</sub> Cl <sub>8</sub> ASSEMBLY SYSTEM ..... | 41 |
| POSCAR FILE OF THE Au <sub>32</sub> (ET <sub>3</sub> P) <sub>12</sub> Cl <sub>8</sub> ASSEMBLY SYSTEM .....               | 60 |
| POSCAR FILE OF THE Au <sub>32</sub> (ME <sub>3</sub> P) <sub>12</sub> Cl <sub>8</sub> ASSEMBLY SYSTEM.....                | 75 |
| POSCAR FILE OF THE Au <sub>32</sub> (P <sub>3</sub> H) <sub>12</sub> Cl <sub>8</sub> ASSEMBLY SYSTEM .....                | 84 |
| POSCAR FILE OF THE Au <sub>32</sub> H <sub>12</sub> Cl <sub>8</sub> ASSEMBLY SYSTEM.....                                  | 88 |



POSCAR file of the Au<sub>32</sub>(<sup>n</sup>Bu<sub>3</sub>P)<sub>12</sub>Cl<sub>8</sub> assembly system

```

1
-7.043839 -7.549582 31.553157
-19.077103 0 0
-8.705954 -17.339527 0
Au Cl P C H
64 16 24 288 648
direct
0.932783 -0.039413 -1.020857 Au
0.067217 -0.960587 -0.979143 Au
0.019625 -0.109254 -0.064531 Au
0.980375 -0.890746 -1.935469 Au
0.993369 -0.945131 -1.14702 Au
0.006631 -0.054869 -0.85298 Au
0.934947 -0.879338 -1.049399 Au
0.065053 -0.120662 -0.950601 Au
0.975517 -0.14516 -1.905899 Au
0.024483 -0.85484 -0.094101 Au
0.958621 -0.74814 -1.052853 Au
0.041379 -0.25186 -0.947147 Au
0.061942 -0.855924 -0.240558 Au
0.938058 -0.144076 -1.759442 Au
0.053573 -0.025423 -0.224053 Au
0.946427 -0.974577 -1.775947 Au
0.977741 -0.781981 -1.204315 Au
0.022259 -0.218019 -0.795685 Au
0.893795 -0.839685 -0.927652 Au
0.106205 -0.160315 -1.072348 Au
0.952887 -0.198949 -0.995817 Au
0.047113 -0.801051 -1.004183 Au
0.959725 -0.057572 -1.160135 Au
0.040275 -0.942428 -0.839865 Au
0.908547 -0.918007 -1.152517 Au
0.091453 -0.081993 -0.847483 Au
0.860702 -0.957281 -0.956735 Au
0.139298 -0.042719 -1.043265 Au
0.884319 -0.121568 -1.86891 Au
0.115681 -0.878432 -0.13109 Au
0.925336 -0.002281 -1.88725 Au
0.074664 -0.997719 -0.11275 Au
0.56987 -0.417 -1.054363 Au
0.43013 -0.583 -0.945637 Au
0.488145 -0.340011 -1.048763 Au

```

|          |           |           |    |
|----------|-----------|-----------|----|
| 0.511855 | -0.659989 | -0.951237 | Au |
| 0.428023 | -0.446813 | -0.916784 | Au |
| 0.571977 | -0.553187 | -1.083216 | Au |
| 0.475565 | -0.589939 | -0.834798 | Au |
| 0.524435 | -0.410061 | -1.165202 | Au |
| 0.561086 | -0.572454 | -0.926636 | Au |
| 0.438914 | -0.427546 | -1.073364 | Au |
| 0.511147 | -0.44368  | -0.903713 | Au |
| 0.488853 | -0.55632  | -1.096287 | Au |
| 0.636934 | -0.530597 | -1.040068 | Au |
| 0.363066 | -0.469403 | -0.959932 | Au |
| 0.610961 | -0.415789 | -1.203118 | Au |
| 0.389039 | -0.584211 | -0.796882 | Au |
| 0.556626 | -0.281536 | -1.185158 | Au |
| 0.443374 | -0.718464 | -0.814842 | Au |
| 0.463914 | -0.278418 | -1.186221 | Au |
| 0.536086 | -0.721582 | -0.813779 | Au |
| 0.401316 | -0.304657 | -1.034354 | Au |
| 0.598684 | -0.695343 | -0.965646 | Au |
| 0.450441 | -0.318362 | -0.909585 | Au |
| 0.549559 | -0.681638 | -1.090415 | Au |
| 0.544017 | -0.299584 | -0.998483 | Au |
| 0.455983 | -0.700416 | -1.001517 | Au |
| 0.440575 | -0.474027 | -0.77654  | Au |
| 0.559425 | -0.525973 | -1.22346  | Au |
| 0.597405 | -0.464594 | -0.913444 | Au |
| 0.402595 | -0.535406 | -1.086556 | Au |
| 0.54053  | -0.571517 | -0.779302 | Au |
| 0.45947  | -0.428483 | -1.220698 | Au |
| 0.077898 | -0.043309 | -0.343274 | Cl |
| 0.922102 | -0.956691 | -1.656726 | Cl |
| 0.925074 | -0.307533 | -0.987251 | Cl |
| 0.074926 | -0.692467 | -1.012749 | Cl |
| 0.790789 | -0.915918 | -0.969632 | Cl |
| 0.209211 | -0.084082 | -1.030368 | Cl |
| 0.957975 | -0.669876 | -1.311407 | Cl |
| 0.042025 | -0.330124 | -0.688593 | Cl |
| 0.420934 | -0.48134  | -0.646173 | Cl |
| 0.579066 | -0.51866  | -1.353827 | Cl |
| 0.711016 | -0.529797 | -1.068805 | Cl |
| 0.288984 | -0.470203 | -0.931195 | Cl |
| 0.569321 | -0.194705 | -0.994977 | Cl |
| 0.430679 | -0.805295 | -1.005023 | Cl |

|          |           |           |    |
|----------|-----------|-----------|----|
| 0.453507 | -0.167087 | -1.302009 | CI |
| 0.546493 | -0.832913 | -0.697991 | CI |
| 0.837172 | -0.20645  | -0.842656 | P  |
| 0.162828 | -0.79355  | -1.157344 | P  |
| 0.837648 | -0.806479 | -0.843058 | P  |
| 0.162352 | -0.193521 | -1.156942 | P  |
| 0.969967 | -0.619214 | -1.130158 | P  |
| 0.030033 | -0.380786 | -0.869842 | P  |
| 0.089376 | -0.794295 | -0.372486 | P  |
| 0.910624 | -0.205705 | -1.627514 | P  |
| 0.959209 | -0.130306 | -1.225661 | P  |
| 0.040791 | -0.869694 | -0.774339 | P  |
| 0.85773  | -0.835993 | -1.21721  | P  |
| 0.14227  | -0.164007 | -0.78279  | P  |
| 0.52897  | -0.636757 | -0.643914 | P  |
| 0.47103  | -0.363243 | -1.356086 | P  |
| 0.653265 | -0.417467 | -0.908221 | P  |
| 0.346735 | -0.582533 | -1.091779 | P  |
| 0.674082 | -0.430753 | -1.285505 | P  |
| 0.325918 | -0.569247 | -0.714495 | P  |
| 0.559185 | -0.149349 | -1.232541 | P  |
| 0.440815 | -0.850651 | -0.767459 | P  |
| 0.342065 | -0.222738 | -1.059931 | P  |
| 0.657935 | -0.777262 | -0.940069 | P  |
| 0.437764 | -0.232579 | -0.852493 | P  |
| 0.562236 | -0.767421 | -1.147507 | P  |
| 0.852645 | -0.311997 | -1.794413 | C  |
| 0.147355 | -0.688003 | -0.205587 | C  |
| 0.822116 | -0.366833 | -1.785329 | C  |
| 0.177884 | -0.633167 | -0.214671 | C  |
| 0.83364  | -0.452882 | -1.734133 | C  |
| 0.16636  | -0.547118 | -0.265867 | C  |
| 0.805951 | -0.508638 | -1.731342 | C  |
| 0.194049 | -0.491362 | -0.268658 | C  |
| 0.785407 | -0.189164 | -1.781797 | C  |
| 0.214593 | -0.810836 | -0.218203 | C  |
| 0.785146 | -0.211882 | -1.695923 | C  |
| 0.214854 | -0.788118 | -0.304077 | C  |
| 0.741626 | -0.195414 | -1.648003 | C  |
| 0.258374 | -0.804586 | -0.351997 | C  |
| 0.74091  | -0.218941 | -1.561782 | C  |
| 0.25909  | -0.781059 | -0.438218 | C  |
| 0.824003 | -0.19507  | -0.932178 | C  |

|          |           |           |   |
|----------|-----------|-----------|---|
| 0.175997 | -0.80493  | -1.067822 | C |
| 0.81503  | -0.10965  | -0.988007 | C |
| 0.18497  | -0.89035  | -1.011993 | C |
| 0.797159 | -0.101582 | -1.055316 | C |
| 0.202841 | -0.898418 | -0.944684 | C |
| 0.752602 | -0.127065 | -1.028807 | C |
| 0.247398 | -0.872935 | -0.971193 | C |
| 0.798826 | -0.878939 | -1.790117 | C |
| 0.201174 | -0.121061 | -0.209883 | C |
| 0.815719 | -0.960337 | -1.73773  | C |
| 0.184281 | -0.039663 | -0.26227  | C |
| 0.780832 | -0.016146 | -1.69197  | C |
| 0.219168 | -0.983854 | -0.30803  | C |
| 0.748326 | -0.996487 | -1.627449 | C |
| 0.251674 | -0.003513 | -0.372551 | C |
| 0.85235  | -0.791577 | -1.767442 | C |
| 0.14765  | -0.208423 | -0.232558 | C |
| 0.816749 | -0.786325 | -1.698559 | C |
| 0.183251 | -0.213675 | -0.301441 | C |
| 0.833734 | -0.775166 | -1.639616 | C |
| 0.166266 | -0.224834 | -0.360384 | C |
| 0.800257 | -0.779197 | -1.565124 | C |
| 0.199743 | -0.220803 | -0.434876 | C |
| 0.804611 | -0.717884 | -0.890434 | C |
| 0.195389 | -0.282116 | -1.109566 | C |
| 0.826798 | -0.642605 | -0.939231 | C |
| 0.173202 | -0.357395 | -1.060769 | C |
| 0.796105 | -0.574349 | -0.978003 | C |
| 0.203895 | -0.425651 | -1.021997 | C |
| 0.815541 | -0.496858 | -1.030277 | C |
| 0.184459 | -0.503142 | -0.969723 | C |
| 0.976382 | -0.564971 | -1.077587 | C |
| 0.023618 | -0.435029 | -0.922413 | C |
| 0.937131 | -0.562239 | -1.013111 | C |
| 0.062869 | -0.437761 | -0.986889 | C |
| 0.942407 | -0.519621 | -0.96661  | C |
| 0.057593 | -0.480379 | -1.03339  | C |
| 0.902809 | -0.515628 | -0.903677 | C |
| 0.097191 | -0.484372 | -1.096323 | C |
| 0.926621 | -0.565315 | -1.179066 | C |
| 0.073379 | -0.434685 | -0.820934 | C |
| 0.930912 | -0.479413 | -1.237021 | C |
| 0.069088 | -0.520587 | -0.762979 | C |

|          |           |           |   |
|----------|-----------|-----------|---|
| 0.891375 | -0.440729 | -1.269143 | C |
| 0.108625 | -0.559271 | -0.730857 | C |
| 0.896419 | -0.35681  | -1.331356 | C |
| 0.103581 | -0.64319  | -0.668644 | C |
| 0.017501 | -0.610602 | -0.21021  | C |
| 0.982499 | -0.389398 | -1.78979  | C |
| 0.038839 | -0.533876 | -0.251442 | C |
| 0.961161 | -0.466124 | -1.748558 | C |
| 0.066585 | -0.523154 | -0.333472 | C |
| 0.933415 | -0.476846 | -1.666528 | C |
| 0.041332 | -0.503082 | -0.394842 | C |
| 0.958668 | -0.496918 | -1.605158 | C |
| 0.127063 | -0.859375 | -0.412966 | C |
| 0.872937 | -0.140625 | -1.587034 | C |
| 0.170272 | -0.892695 | -0.605946 | C |
| 0.829728 | -0.107305 | -1.394054 | C |
| 0.13318  | -0.842454 | -0.4998   | C |
| 0.86682  | -0.157546 | -1.5002   | C |
| 0.163424 | -0.906334 | -0.520053 | C |
| 0.836576 | -0.093666 | -1.479947 | C |
| 0.115848 | -0.70788  | -0.398507 | C |
| 0.884152 | -0.29212  | -1.601493 | C |
| 0.132655 | -0.656337 | -0.485808 | C |
| 0.867345 | -0.343663 | -1.514192 | C |
| 0.155748 | -0.589547 | -0.496939 | C |
| 0.844252 | -0.410453 | -1.503061 | C |
| 0.168906 | -0.532573 | -0.583308 | C |
| 0.831094 | -0.467427 | -1.416692 | C |
| 0.047382 | -0.759082 | -0.425871 | C |
| 0.952618 | -0.240918 | -1.574129 | C |
| 0.01979  | -0.824457 | -0.402473 | C |
| 0.98021  | -0.175543 | -1.597527 | C |
| 0.98599  | -0.798406 | -1.449891 | C |
| 0.01401  | -0.201594 | -0.550109 | C |
| 0.003512 | -0.782192 | -0.537018 | C |
| 0.996488 | -0.217808 | -1.462982 | C |
| 0.00045  | -0.212981 | -0.206844 | C |
| 0.99955  | -0.787019 | -1.793156 | C |
| 0.073343 | -0.341243 | -0.312551 | C |
| 0.926657 | -0.658757 | -1.687449 | C |
| 0.018424 | -0.244847 | -0.270274 | C |
| 0.981576 | -0.755153 | -1.729726 | C |
| 0.051799 | -0.314022 | -0.246664 | C |

|          |           |           |   |
|----------|-----------|-----------|---|
| 0.948201 | -0.685978 | -1.753336 | C |
| 0.968011 | -0.079003 | -1.333341 | C |
| 0.031989 | -0.920997 | -0.666659 | C |
| 0.907403 | -0.906368 | -1.479868 | C |
| 0.092597 | -0.093632 | -0.520132 | C |
| 0.934255 | -0.012165 | -1.361411 | C |
| 0.065745 | -0.987835 | -0.638589 | C |
| 0.941953 | -0.971131 | -1.451464 | C |
| 0.058047 | -0.028869 | -0.548536 | C |
| 0.908463 | -0.172215 | -1.189491 | C |
| 0.091537 | -0.827785 | -0.810509 | C |
| 0.901118 | -0.223771 | -1.225177 | C |
| 0.098882 | -0.776229 | -0.774823 | C |
| 0.856429 | -0.250794 | -1.190428 | C |
| 0.143571 | -0.749206 | -0.809572 | C |
| 0.848253 | -0.304637 | -1.102407 | C |
| 0.151747 | -0.695363 | -0.897593 | C |
| 0.818271 | -0.886179 | -1.222387 | C |
| 0.181729 | -0.113821 | -0.777613 | C |
| 0.837843 | -0.942482 | -1.262031 | C |
| 0.162157 | -0.057518 | -0.737969 | C |
| 0.805587 | -0.979323 | -1.274532 | C |
| 0.194413 | -0.020677 | -0.725468 | C |
| 0.781402 | -0.920879 | -1.336176 | C |
| 0.218598 | -0.079121 | -0.663824 | C |
| 0.825387 | -0.770106 | -1.173028 | C |
| 0.174613 | -0.229894 | -0.826972 | C |
| 0.850744 | -0.727188 | -1.152585 | C |
| 0.149256 | -0.272812 | -0.847415 | C |
| 0.823277 | -0.66472  | -1.126136 | C |
| 0.176723 | -0.33528  | -0.873864 | C |
| 0.808955 | -0.59238  | -1.193459 | C |
| 0.191045 | -0.40762  | -0.806541 | C |
| 0.880774 | -0.773869 | -1.3205   | C |
| 0.119226 | -0.226131 | -0.6795   | C |
| 0.849633 | -0.720916 | -1.370915 | C |
| 0.150367 | -0.279084 | -0.629085 | C |
| 0.871466 | -0.675315 | -1.457313 | C |
| 0.128534 | -0.324685 | -0.542687 | C |
| 0.840179 | -0.624547 | -1.508041 | C |
| 0.159821 | -0.375453 | -0.491959 | C |
| 0.525196 | -0.57682  | -0.590299 | C |
| 0.474804 | -0.42318  | -1.409701 | C |

|          |           |           |   |
|----------|-----------|-----------|---|
| 0.566409 | -0.542395 | -0.608191 | C |
| 0.433591 | -0.457605 | -1.391809 | C |
| 0.56401  | -0.498608 | -1.557758 | C |
| 0.43599  | -0.501392 | -0.442242 | C |
| 0.604618 | -0.461856 | -1.577522 | C |
| 0.395382 | -0.538144 | -0.422478 | C |
| 0.570085 | -0.716212 | -0.611067 | C |
| 0.429915 | -0.283788 | -1.388933 | C |
| 0.5652   | -0.764788 | -1.522137 | C |
| 0.4348   | -0.235212 | -0.477863 | C |
| 0.605436 | -0.817337 | -1.502932 | C |
| 0.394564 | -0.182663 | -0.497068 | C |
| 0.599591 | -0.873083 | -1.415795 | C |
| 0.400409 | -0.126917 | -0.584205 | C |
| 0.478565 | -0.680347 | -0.606956 | C |
| 0.521435 | -0.319653 | -1.393044 | C |
| 0.456528 | -0.705033 | -0.519593 | C |
| 0.543472 | -0.294967 | -1.480407 | C |
| 0.413056 | -0.731495 | -0.502303 | C |
| 0.586944 | -0.268505 | -1.497697 | C |
| 0.389749 | -0.75838  | -0.415634 | C |
| 0.610251 | -0.24162  | -1.584366 | C |
| 0.690494 | -0.491627 | -0.853734 | C |
| 0.309506 | -0.508373 | -1.146266 | C |
| 0.67305  | -0.536954 | -0.76546  | C |
| 0.32695  | -0.463046 | -1.23454  | C |
| 0.70532  | -0.602239 | -0.727436 | C |
| 0.29468  | -0.397761 | -1.272564 | C |
| 0.690279 | -0.645179 | -1.638142 | C |
| 0.309721 | -0.354821 | -0.361858 | C |
| 0.68909  | -0.369147 | -1.003711 | C |
| 0.31091  | -0.630853 | -0.996289 | C |
| 0.668057 | -0.307368 | -1.068794 | C |
| 0.331943 | -0.692632 | -0.931206 | C |
| 0.699676 | -0.275882 | -1.148648 | C |
| 0.300324 | -0.724118 | -0.851352 | C |
| 0.73228  | -0.228524 | -1.151983 | C |
| 0.26772  | -0.771476 | -0.848017 | C |
| 0.63525  | -0.348115 | -0.861848 | C |
| 0.36475  | -0.651885 | -1.138152 | C |
| 0.668901 | -0.313112 | -0.851119 | C |
| 0.331099 | -0.686888 | -1.148881 | C |
| 0.649023 | -0.259539 | -0.808123 | C |

|          |           |           |   |
|----------|-----------|-----------|---|
| 0.350977 | -0.740461 | -1.191877 | C |
| 0.68153  | -0.225229 | -0.794018 | C |
| 0.31847  | -0.774771 | -1.205982 | C |
| 0.667873 | -0.410099 | -1.383597 | C |
| 0.332127 | -0.589901 | -0.616403 | C |
| 0.705795 | -0.433926 | -1.4386   | C |
| 0.294205 | -0.566074 | -0.5614   | C |
| 0.697226 | -0.409312 | -1.519704 | C |
| 0.302774 | -0.590688 | -0.480296 | C |
| 0.733897 | -0.433931 | -1.575753 | C |
| 0.266103 | -0.566069 | -0.424247 | C |
| 0.70283  | -0.527982 | -1.253308 | C |
| 0.29717  | -0.472018 | -0.746692 | C |
| 0.67793  | -0.594199 | -1.237586 | C |
| 0.32207  | -0.405801 | -0.762414 | C |
| 0.706742 | -0.668911 | -1.234297 | C |
| 0.293258 | -0.331089 | -0.765703 | C |
| 0.732326 | -0.66469  | -1.31522  | C |
| 0.267674 | -0.33531  | -0.68478  | C |
| 0.714194 | -0.367686 | -1.304781 | C |
| 0.285806 | -0.632314 | -0.695219 | C |
| 0.699631 | -0.280218 | -1.337047 | C |
| 0.300369 | -0.719782 | -0.662953 | C |
| 0.734728 | -0.228995 | -1.358231 | C |
| 0.265272 | -0.771005 | -0.641769 | C |
| 0.719922 | -0.141682 | -1.389996 | C |
| 0.280078 | -0.858318 | -0.610004 | C |
| 0.602797 | -0.126957 | -1.208161 | C |
| 0.397203 | -0.873043 | -0.791839 | C |
| 0.599591 | -0.04746  | -1.205117 | C |
| 0.400409 | -0.95254  | -0.794883 | C |
| 0.638167 | -0.037072 | -1.184188 | C |
| 0.361833 | -0.962928 | -0.815812 | C |
| 0.678803 | -0.028307 | -1.248531 | C |
| 0.321197 | -0.971693 | -0.751469 | C |
| 0.565715 | -0.097762 | -1.33981  | C |
| 0.434285 | -0.902238 | -0.66019  | C |
| 0.600322 | -0.137519 | -1.38585  | C |
| 0.399678 | -0.862481 | -0.61415  | C |
| 0.60601  | -0.093079 | -1.475492 | C |
| 0.39399  | -0.906921 | -0.524508 | C |
| 0.61968  | -0.010742 | -1.508366 | C |
| 0.38032  | -0.989258 | -0.491634 | C |



|          |           |           |   |
|----------|-----------|-----------|---|
| 0.454024 | -0.986503 | -1.221116 | C |
| 0.545976 | -0.013497 | -0.778884 | C |
| 0.509064 | -0.103496 | -1.193294 | C |
| 0.490936 | -0.896504 | -0.806706 | C |
| 0.501142 | -0.013708 | -1.229657 | C |
| 0.498858 | -0.986292 | -0.770343 | C |
| 0.445283 | -0.897948 | -1.247312 | C |
| 0.554717 | -0.102052 | -0.752688 | C |
| 0.305512 | -0.261949 | -1.085584 | C |
| 0.694488 | -0.738051 | -0.914416 | C |
| 0.324741 | -0.199451 | -1.272095 | C |
| 0.675259 | -0.800549 | -0.727905 | C |
| 0.324421 | -0.31022  | -1.1343   | C |
| 0.675579 | -0.68978  | -0.8657   | C |
| 0.349866 | -0.267082 | -1.218103 | C |
| 0.650134 | -0.732918 | -0.781897 | C |
| 0.355501 | -0.126478 | -1.139639 | C |
| 0.644499 | -0.873522 | -0.860361 | C |
| 0.318701 | -0.062895 | -1.156226 | C |
| 0.681299 | -0.937105 | -0.843774 | C |
| 0.333363 | -0.982848 | -1.218117 | C |
| 0.666637 | -0.017152 | -0.781883 | C |
| 0.352473 | -0.980541 | -1.300605 | C |
| 0.647527 | -0.019459 | -0.699395 | C |
| 0.305848 | -0.199923 | -0.979935 | C |
| 0.694152 | -0.800077 | -1.020065 | C |
| 0.322928 | -0.154018 | -0.949525 | C |
| 0.677072 | -0.845982 | -1.050475 | C |
| 0.287196 | -0.12283  | -0.896989 | C |
| 0.712804 | -0.87717  | -1.103011 | C |
| 0.302151 | -0.082035 | -0.858761 | C |
| 0.697849 | -0.917965 | -1.141239 | C |
| 0.447157 | -0.001813 | -1.027243 | C |
| 0.552843 | -0.998187 | -0.972757 | C |
| 0.424601 | -0.127443 | -0.907577 | C |
| 0.575399 | -0.872557 | -1.092423 | C |
| 0.452258 | -0.09175  | -0.991173 | C |
| 0.547742 | -0.90825  | -1.008827 | C |
| 0.402205 | -0.965581 | -1.033399 | C |
| 0.597795 | -0.034419 | -0.966601 | C |
| 0.394611 | -0.261651 | -0.763492 | C |
| 0.605389 | -0.738349 | -1.236508 | C |
| 0.385511 | -0.213981 | -0.714243 | C |

|          |           |           |   |
|----------|-----------|-----------|---|
| 0.614489 | -0.786019 | -1.285757 | C |
| 0.345631 | -0.235117 | -0.647234 | C |
| 0.654369 | -0.764883 | -1.352766 | C |
| 0.349456 | -0.317793 | -0.582481 | C |
| 0.650544 | -0.682207 | -1.417519 | C |
| 0.483645 | -0.23422  | -0.81865  | C |
| 0.516355 | -0.76578  | -1.18135  | C |
| 0.501776 | -0.317079 | -0.771518 | C |
| 0.498224 | -0.682921 | -1.228482 | C |
| 0.530658 | -0.3169   | -0.72352  | C |
| 0.469342 | -0.6831   | -1.27648  | C |
| 0.506595 | -0.29794  | -0.652919 | C |
| 0.493405 | -0.70206  | -1.347081 | C |
| 0.884062 | -0.321865 | -1.831231 | H |
| 0.115938 | -0.678135 | -0.168769 | H |
| 0.857668 | -0.323292 | -1.73631  | H |
| 0.142332 | -0.676708 | -0.26369  | H |
| 0.822178 | -0.361049 | -0.844672 | H |
| 0.177822 | -0.638951 | -1.155328 | H |
| 0.789188 | -0.349528 | -1.759113 | H |
| 0.210812 | -0.650472 | -0.240887 | H |
| 0.867311 | -0.469068 | -1.757283 | H |
| 0.132689 | -0.530932 | -0.242717 | H |
| 0.831291 | -0.459664 | -1.673368 | H |
| 0.168709 | -0.540336 | -0.326632 | H |
| 0.814304 | -0.570378 | -1.692898 | H |
| 0.185696 | -0.429622 | -0.307102 | H |
| 0.772145 | -0.493997 | -1.708079 | H |
| 0.227855 | -0.506003 | -0.291921 | H |
| 0.809417 | -0.505335 | -1.79108  | H |
| 0.190583 | -0.494665 | -0.20892  | H |
| 0.775555 | -0.125643 | -0.811173 | H |
| 0.224445 | -0.874357 | -1.188827 | H |
| 0.762552 | -0.221443 | -0.785208 | H |
| 0.237448 | -0.778557 | -1.214792 | H |
| 0.795643 | -0.275357 | -1.6674   | H |
| 0.204357 | -0.724643 | -0.3326   | H |
| 0.808581 | -0.179471 | -1.694118 | H |
| 0.191419 | -0.820529 | -0.305882 | H |
| 0.731049 | -0.132053 | -1.675939 | H |
| 0.268951 | -0.867947 | -0.324061 | H |
| 0.718438 | -0.227039 | -1.651515 | H |
| 0.281562 | -0.772961 | -0.348485 | H |

|          |           |           |   |
|----------|-----------|-----------|---|
| 0.70903  | -0.20681  | -1.528276 | H |
| 0.29097  | -0.79319  | -0.471724 | H |
| 0.75048  | -0.282437 | -1.531903 | H |
| 0.24952  | -0.717563 | -0.468097 | H |
| 0.762832 | -0.18627  | -1.556614 | H |
| 0.237168 | -0.81373  | -0.443386 | H |
| 0.851256 | -0.224594 | -0.961766 | H |
| 0.148744 | -0.775406 | -1.038234 | H |
| 0.796404 | -0.229041 | -0.912358 | H |
| 0.203596 | -0.770959 | -1.087642 | H |
| 0.844799 | -0.080555 | -1.012586 | H |
| 0.155201 | -0.919445 | -0.987414 | H |
| 0.792847 | -0.076348 | -0.955551 | H |
| 0.207153 | -0.923652 | -1.044449 | H |
| 0.796965 | -0.039193 | -1.098256 | H |
| 0.203035 | -0.960807 | -0.901744 | H |
| 0.818884 | -0.135281 | -1.087805 | H |
| 0.181116 | -0.864719 | -0.912195 | H |
| 0.740252 | -0.11665  | -1.079764 | H |
| 0.259748 | -0.88335  | -0.920236 | H |
| 0.751454 | -0.190423 | -0.989554 | H |
| 0.248546 | -0.809577 | -1.010446 | H |
| 0.730459 | -0.094065 | -0.99623  | H |
| 0.269541 | -0.905935 | -1.00377  | H |
| 0.771705 | -0.853995 | -1.755788 | H |
| 0.228295 | -0.146005 | -0.244212 | H |
| 0.787616 | -0.882653 | -0.836714 | H |
| 0.212384 | -0.117347 | -1.163286 | H |
| 0.841163 | -0.984254 | -1.775589 | H |
| 0.158837 | -0.015746 | -0.224411 | H |
| 0.830792 | -0.956748 | -1.695694 | H |
| 0.169208 | -0.043252 | -0.304306 | H |
| 0.795561 | -0.076856 | -1.665093 | H |
| 0.204439 | -0.923144 | -0.334907 | H |
| 0.764906 | -0.016178 | -1.734656 | H |
| 0.235094 | -0.983822 | -0.265344 | H |
| 0.724171 | -0.039155 | -1.594914 | H |
| 0.275829 | -0.960845 | -0.405086 | H |
| 0.763686 | -0.997337 | -1.58378  | H |
| 0.236314 | -0.002663 | -0.41622  | H |
| 0.731238 | -0.937654 | -1.65165  | H |
| 0.268762 | -0.062346 | -0.34835  | H |
| 0.876341 | -0.840652 | -1.744645 | H |

|          |           |           |   |
|----------|-----------|-----------|---|
| 0.123659 | -0.159348 | -0.255355 | H |
| 0.869377 | -0.737695 | -1.799549 | H |
| 0.130623 | -0.262305 | -0.200451 | H |
| 0.800618 | -0.841222 | -1.667253 | H |
| 0.199382 | -0.158778 | -0.332747 | H |
| 0.792208 | -0.737845 | -1.719821 | H |
| 0.207792 | -0.262155 | -0.280179 | H |
| 0.860183 | -0.821016 | -1.623782 | H |
| 0.139817 | -0.178984 | -0.376218 | H |
| 0.847674 | -0.718046 | -1.669171 | H |
| 0.152326 | -0.281954 | -0.330829 | H |
| 0.813693 | -0.772833 | -1.522868 | H |
| 0.186307 | -0.227167 | -0.477132 | H |
| 0.77414  | -0.732228 | -1.578739 | H |
| 0.22586  | -0.267772 | -0.421261 | H |
| 0.786253 | -0.836122 | -1.53431  | H |
| 0.213747 | -0.163878 | -0.46569  | H |
| 0.791272 | -0.731219 | -0.928672 | H |
| 0.208728 | -0.268781 | -1.071328 | H |
| 0.777511 | -0.710439 | -0.843589 | H |
| 0.222489 | -0.289561 | -1.156411 | H |
| 0.840268 | -0.628492 | -0.901637 | H |
| 0.159732 | -0.371508 | -1.098363 | H |
| 0.854133 | -0.651815 | -0.984788 | H |
| 0.145867 | -0.348185 | -1.015212 | H |
| 0.781695 | -0.590197 | -1.013042 | H |
| 0.218305 | -0.409803 | -0.986958 | H |
| 0.769265 | -0.566579 | -0.931062 | H |
| 0.230735 | -0.433421 | -1.068938 | H |
| 0.791944 | -0.450446 | -1.057953 | H |
| 0.208056 | -0.549554 | -0.942047 | H |
| 0.828242 | -0.476375 | -0.996687 | H |
| 0.171758 | -0.523625 | -1.003313 | H |
| 0.841988 | -0.502136 | -1.078808 | H |
| 0.158012 | -0.497864 | -0.921192 | H |
| 0.004342 | -0.595305 | -0.052189 | H |
| 0.995658 | -0.404695 | -1.947811 | H |
| 0.984324 | -0.504789 | -1.121054 | H |
| 0.015676 | -0.495211 | -0.878946 | H |
| 0.929255 | -0.623229 | -0.972279 | H |
| 0.070745 | -0.376771 | -1.027721 | H |
| 0.909461 | -0.532856 | -1.039611 | H |
| 0.090539 | -0.467144 | -0.960389 | H |

|          |           |           |   |
|----------|-----------|-----------|---|
| 0.969635 | -0.549503 | -1.939026 | H |
| 0.030365 | -0.450497 | -0.060974 | H |
| 0.950743 | -0.458991 | -1.007499 | H |
| 0.049257 | -0.541009 | -0.992501 | H |
| 0.907461 | -0.484106 | -1.871313 | H |
| 0.092539 | -0.515894 | -0.128687 | H |
| 0.875716 | -0.48345  | -0.930682 | H |
| 0.124284 | -0.51655  | -1.069318 | H |
| 0.893817 | -0.575042 | -1.860226 | H |
| 0.106183 | -0.424958 | -0.139774 | H |
| 0.923409 | -0.600102 | -1.209728 | H |
| 0.076591 | -0.399898 | -0.790272 | H |
| 0.897602 | -0.571134 | -1.131076 | H |
| 0.102398 | -0.428866 | -0.868924 | H |
| 0.958238 | -0.475725 | -1.287484 | H |
| 0.041762 | -0.524275 | -0.712516 | H |
| 0.937542 | -0.445305 | -1.208694 | H |
| 0.062458 | -0.554695 | -0.791306 | H |
| 0.884087 | -0.476586 | -1.294847 | H |
| 0.115913 | -0.523414 | -0.705153 | H |
| 0.86386  | -0.441911 | -1.219592 | H |
| 0.13614  | -0.558089 | -0.780408 | H |
| 0.867278 | -0.328891 | -1.352785 | H |
| 0.132722 | -0.671109 | -0.647215 | H |
| 0.904305 | -0.31958  | -1.307945 | H |
| 0.095695 | -0.68042  | -0.692055 | H |
| 0.922257 | -0.355423 | -1.383259 | H |
| 0.077743 | -0.644577 | -0.616741 | H |
| 0.040113 | -0.661129 | -0.184853 | H |
| 0.959887 | -0.338871 | -1.815147 | H |
| 0.007    | -0.623164 | -0.252363 | H |
| 0.993    | -0.376836 | -1.747637 | H |
| 0.05814  | -0.533775 | -0.213865 | H |
| 0.94186  | -0.466225 | -1.786135 | H |
| 0.015223 | -0.482199 | -0.258023 | H |
| 0.984777 | -0.517801 | -1.741977 | H |
| 0.087974 | -0.577601 | -0.32801  | H |
| 0.912026 | -0.422399 | -1.67199  | H |
| 0.087553 | -0.476218 | -0.354221 | H |
| 0.912447 | -0.523782 | -1.645779 | H |
| 0.062214 | -0.497796 | -0.452781 | H |
| 0.937786 | -0.502204 | -1.547219 | H |
| 0.01952  | -0.547943 | -0.376661 | H |

|          |           |           |   |
|----------|-----------|-----------|---|
| 0.98048  | -0.452057 | -1.623339 | H |
| 0.022086 | -0.446038 | -0.404726 | H |
| 0.977914 | -0.553962 | -1.595274 | H |
| 0.157514 | -0.861196 | -0.399472 | H |
| 0.842486 | -0.138804 | -1.600528 | H |
| 0.116039 | -0.918898 | -0.375672 | H |
| 0.883961 | -0.081102 | -1.624328 | H |
| 0.192907 | -0.938659 | -0.619742 | H |
| 0.807093 | -0.061341 | -1.380258 | H |
| 0.140237 | -0.893002 | -0.619356 | H |
| 0.859763 | -0.106998 | -1.380644 | H |
| 0.182696 | -0.835232 | -0.647237 | H |
| 0.817304 | -0.164768 | -1.352763 | H |
| 0.145167 | -0.784222 | -0.539653 | H |
| 0.854833 | -0.215778 | -1.460347 | H |
| 0.102281 | -0.840194 | -0.511863 | H |
| 0.897719 | -0.159806 | -1.488137 | H |
| 0.150691 | -0.963887 | -0.479797 | H |
| 0.849309 | -0.036113 | -1.520203 | H |
| 0.194164 | -0.909373 | -0.506922 | H |
| 0.805836 | -0.090627 | -1.493078 | H |
| 0.092484 | -0.672809 | -0.369438 | H |
| 0.907516 | -0.327191 | -1.630562 | H |
| 0.141671 | -0.730563 | -0.366613 | H |
| 0.858329 | -0.269437 | -1.633387 | H |
| 0.10626  | -0.631268 | -0.516252 | H |
| 0.89374  | -0.368732 | -1.483748 | H |
| 0.154555 | -0.692052 | -0.515777 | H |
| 0.845445 | -0.307948 | -1.484223 | H |
| 0.183911 | -0.615074 | -0.471197 | H |
| 0.816089 | -0.384926 | -1.528803 | H |
| 0.135135 | -0.557223 | -0.462051 | H |
| 0.864865 | -0.442777 | -1.537949 | H |
| 0.18746  | -0.487082 | -0.590577 | H |
| 0.81254  | -0.512918 | -1.409423 | H |
| 0.188517 | -0.56325  | -0.620356 | H |
| 0.811483 | -0.43675  | -1.379644 | H |
| 0.141008 | -0.501769 | -0.608202 | H |
| 0.858992 | -0.498231 | -1.391798 | H |
| 0.027816 | -0.711111 | -0.410378 | H |
| 0.972184 | -0.288889 | -1.589622 | H |
| 0.062062 | -0.733872 | -0.490199 | H |
| 0.937938 | -0.266128 | -1.509801 | H |

|          |           |           |   |
|----------|-----------|-----------|---|
| 0.004504 | -0.843999 | -0.338483 | H |
| 0.995496 | -0.156001 | -1.661517 | H |
| 0.039497 | -0.877012 | -0.408607 | H |
| 0.960503 | -0.122988 | -1.591393 | H |
| 0.964222 | -0.845325 | -1.422508 | H |
| 0.035778 | -0.154675 | -0.577492 | H |
| 0.96671  | -0.745682 | -1.44378  | H |
| 0.03329  | -0.254318 | -0.55622  | H |
| 0.977916 | -0.767787 | -1.567953 | H |
| 0.022084 | -0.232213 | -0.432047 | H |
| 0.023516 | -0.73249  | -0.568781 | H |
| 0.976484 | -0.26751  | -1.431219 | H |
| 0.02322  | -0.834335 | -0.543665 | H |
| 0.97678  | -0.165665 | -1.456335 | H |
| 0.02618  | -0.191702 | -0.19793  | H |
| 0.97382  | -0.808298 | -1.80207  | H |
| 0.986761 | -0.258884 | -1.148472 | H |
| 0.013239 | -0.741116 | -0.851528 | H |
| 0.097105 | -0.391849 | -0.293988 | H |
| 0.902895 | -0.608151 | -1.706012 | H |
| 0.050217 | -0.359544 | -0.330622 | H |
| 0.949783 | -0.640456 | -1.669378 | H |
| 0.089727 | -0.293562 | -0.365672 | H |
| 0.910273 | -0.706438 | -1.634328 | H |
| 0.033148 | -0.197389 | -0.326168 | H |
| 0.966852 | -0.802611 | -1.673832 | H |
| 0.993069 | -0.262826 | -1.283606 | H |
| 0.006931 | -0.737174 | -0.716394 | H |
| 0.075749 | -0.296433 | -0.229565 | H |
| 0.924251 | -0.703567 | -1.770435 | H |
| 0.037139 | -0.363426 | -0.192794 | H |
| 0.962861 | -0.636574 | -1.807206 | H |
| 0.999772 | -0.0572   | -1.354361 | H |
| 0.000228 | -0.9428   | -0.645639 | H |
| 0.969967 | -0.122952 | -1.357104 | H |
| 0.030033 | -0.877048 | -0.642896 | H |
| 0.912991 | -0.880137 | -1.545069 | H |
| 0.087009 | -0.119863 | -0.454931 | H |
| 0.876022 | -0.92965  | -1.455744 | H |
| 0.123978 | -0.07035  | -0.544256 | H |
| 0.905597 | -0.858812 | -1.460995 | H |
| 0.094403 | -0.141188 | -0.539005 | H |
| 0.932796 | -0.969089 | -1.336776 | H |

|          |           |           |   |
|----------|-----------|-----------|---|
| 0.067204 | -0.030911 | -0.663224 | H |
| 0.902581 | -0.034838 | -1.337017 | H |
| 0.097419 | -0.965162 | -0.662983 | H |
| 0.944375 | -0.015001 | -1.475586 | H |
| 0.055625 | -0.984999 | -0.524414 | H |
| 0.973097 | -0.946688 | -1.476229 | H |
| 0.026903 | -0.053312 | -0.523771 | H |
| 0.90574  | -0.205276 | -1.124791 | H |
| 0.09426  | -0.794724 | -0.875209 | H |
| 0.883928 | -0.121666 | -1.196961 | H |
| 0.116072 | -0.878334 | -0.803039 | H |
| 0.924535 | -0.276145 | -1.21382  | H |
| 0.075465 | -0.723855 | -0.78618  | H |
| 0.906351 | -0.191564 | -1.290386 | H |
| 0.093649 | -0.808436 | -0.709614 | H |
| 0.851125 | -0.281378 | -1.223288 | H |
| 0.148875 | -0.718622 | -0.776712 | H |
| 0.833127 | -0.198238 | -1.201065 | H |
| 0.166873 | -0.801762 | -0.798935 | H |
| 0.816061 | -0.324066 | -1.079745 | H |
| 0.183939 | -0.675934 | -0.920255 | H |
| 0.870837 | -0.357951 | -1.090792 | H |
| 0.129163 | -0.642049 | -0.909208 | H |
| 0.851854 | -0.275932 | -1.066589 | H |
| 0.148146 | -0.724068 | -0.933411 | H |
| 0.800736 | -0.917665 | -1.160605 | H |
| 0.199264 | -0.082335 | -0.839395 | H |
| 0.795333 | -0.840499 | -1.253562 | H |
| 0.204667 | -0.159501 | -0.746438 | H |
| 0.858725 | -0.988804 | -1.225997 | H |
| 0.141275 | -0.011196 | -0.774003 | H |
| 0.858923 | -0.91126  | -1.320406 | H |
| 0.141077 | -0.08874  | -0.679594 | H |
| 0.82245  | -0.026883 | -1.293083 | H |
| 0.17755  | -0.973117 | -0.706917 | H |
| 0.783198 | -0.008674 | -1.217235 | H |
| 0.216802 | -0.991326 | -0.782765 | H |
| 0.759642 | -0.949976 | -1.346082 | H |
| 0.240358 | -0.050024 | -0.653918 | H |
| 0.761972 | -0.874455 | -1.318361 | H |
| 0.238028 | -0.125545 | -0.681639 | H |
| 0.803388 | -0.891421 | -1.393688 | H |
| 0.196612 | -0.108579 | -0.606312 | H |



|          |           |           |   |
|----------|-----------|-----------|---|
| 0.805561 | -0.72855  | -1.214326 | H |
| 0.194439 | -0.27145  | -0.785674 | H |
| 0.804033 | -0.807638 | -1.118186 | H |
| 0.195967 | -0.192362 | -0.881814 | H |
| 0.876947 | -0.699527 | -1.203685 | H |
| 0.123053 | -0.300473 | -0.796315 | H |
| 0.866208 | -0.771335 | -1.104932 | H |
| 0.133792 | -0.228665 | -0.895068 | H |
| 0.795386 | -0.691009 | -1.078913 | H |
| 0.204614 | -0.308991 | -0.921087 | H |
| 0.841541 | -0.646739 | -1.098408 | H |
| 0.158459 | -0.353261 | -0.901592 | H |
| 0.788749 | -0.54878  | -1.172256 | H |
| 0.211251 | -0.45122  | -0.827744 | H |
| 0.836553 | -0.56397  | -1.239457 | H |
| 0.163447 | -0.43603  | -0.760543 | H |
| 0.790181 | -0.607539 | -1.22245  | H |
| 0.209819 | -0.392461 | -0.77755  | H |
| 0.903147 | -0.73921  | -1.31891  | H |
| 0.096853 | -0.26079  | -0.68109  | H |
| 0.900846 | -0.814403 | -1.346349 | H |
| 0.099154 | -0.185597 | -0.653651 | H |
| 0.830758 | -0.678702 | -1.346195 | H |
| 0.169242 | -0.321298 | -0.653805 | H |
| 0.82656  | -0.756269 | -1.369268 | H |
| 0.17344  | -0.243731 | -0.630732 | H |
| 0.890869 | -0.717555 | -1.481633 | H |
| 0.109131 | -0.282445 | -0.518367 | H |
| 0.894126 | -0.638575 | -1.460193 | H |
| 0.105874 | -0.361425 | -0.539807 | H |
| 0.856311 | -0.593833 | -1.570791 | H |
| 0.143689 | -0.406167 | -0.429209 | H |
| 0.817299 | -0.660373 | -1.505762 | H |
| 0.182701 | -0.339627 | -0.494238 | H |
| 0.821739 | -0.579278 | -1.487467 | H |
| 0.178261 | -0.420722 | -0.512533 | H |
| 0.499013 | -0.530253 | -0.60604  | H |
| 0.500987 | -0.469747 | -1.39396  | H |
| 0.515233 | -0.613989 | -0.526067 | H |
| 0.484767 | -0.386011 | -1.473933 | H |
| 0.59279  | -0.589675 | -0.598165 | H |
| 0.40721  | -0.410325 | -1.401835 | H |
| 0.574977 | -0.502696 | -0.672055 | H |

|          |           |           |   |
|----------|-----------|-----------|---|
| 0.425023 | -0.497304 | -1.327945 | H |
| 0.556923 | -0.539562 | -1.49423  | H |
| 0.443077 | -0.460438 | -0.50577  | H |
| 0.536978 | -0.452673 | -0.565216 | H |
| 0.463022 | -0.547327 | -1.434784 | H |
| 0.602751 | -0.433869 | -1.537633 | H |
| 0.397249 | -0.566131 | -0.462367 | H |
| 0.632045 | -0.506789 | -1.570957 | H |
| 0.367955 | -0.493211 | -0.429043 | H |
| 0.611362 | -0.416761 | -0.63929  | H |
| 0.388638 | -0.583239 | -1.36071  | H |
| 0.571794 | -0.754368 | -0.641456 | H |
| 0.428206 | -0.245632 | -1.358544 | H |
| 0.600171 | -0.687995 | -0.637375 | H |
| 0.399829 | -0.312005 | -1.362625 | H |
| 0.538806 | -0.802201 | -1.499176 | H |
| 0.461194 | -0.197799 | -0.500824 | H |
| 0.556569 | -0.726544 | -1.489697 | H |
| 0.443431 | -0.273456 | -0.510303 | H |
| 0.615633 | -0.851435 | -1.539618 | H |
| 0.384367 | -0.148565 | -0.460382 | H |
| 0.631355 | -0.780126 | -1.520778 | H |
| 0.368645 | -0.219874 | -0.479222 | H |
| 0.628582 | -0.912223 | -1.403057 | H |
| 0.371418 | -0.087777 | -0.596943 | H |
| 0.590987 | -0.840614 | -1.377818 | H |
| 0.409013 | -0.159386 | -0.622182 | H |
| 0.573834 | -0.910802 | -1.396977 | H |
| 0.426166 | -0.089198 | -0.603023 | H |
| 0.457561 | -0.63524  | -0.643647 | H |
| 0.542439 | -0.36476  | -1.356353 | H |
| 0.484986 | -0.730062 | -0.624731 | H |
| 0.515014 | -0.269938 | -1.375269 | H |
| 0.452407 | -0.654681 | -0.503574 | H |
| 0.547593 | -0.345319 | -1.496426 | H |
| 0.47585  | -0.752684 | -0.481216 | H |
| 0.52415  | -0.247316 | -1.518784 | H |
| 0.394186 | -0.681818 | -0.539773 | H |
| 0.605814 | -0.318182 | -1.460227 | H |
| 0.416625 | -0.77938  | -0.521582 | H |
| 0.583375 | -0.22062  | -1.478418 | H |
| 0.35811  | -0.775928 | -0.405357 | H |
| 0.64189  | -0.224072 | -1.594643 | H |

|          |           |           |   |
|----------|-----------|-----------|---|
| 0.407416 | -0.809465 | -1.377185 | H |
| 0.592584 | -0.190535 | -0.622815 | H |
| 0.385123 | -0.711092 | -0.395227 | H |
| 0.614877 | -0.288908 | -1.604773 | H |
| 0.701421 | -0.532108 | -0.883732 | H |
| 0.298579 | -0.467892 | -1.116268 | H |
| 0.718398 | -0.461897 | -0.864264 | H |
| 0.281602 | -0.538103 | -1.135736 | H |
| 0.663711 | -0.496501 | -0.735375 | H |
| 0.336289 | -0.503499 | -1.264625 | H |
| 0.64367  | -0.562205 | -0.755859 | H |
| 0.35633  | -0.437795 | -1.244141 | H |
| 0.71278  | -0.644551 | -0.755153 | H |
| 0.28722  | -0.355449 | -1.244847 | H |
| 0.735402 | -0.5769   | -0.741821 | H |
| 0.264598 | -0.4231   | -1.258179 | H |
| 0.713619 | -0.693477 | -1.612249 | H |
| 0.286381 | -0.306523 | -0.387751 | H |
| 0.684417 | -0.604778 | -1.608853 | H |
| 0.315583 | -0.395222 | -0.391147 | H |
| 0.660344 | -0.671278 | -1.622122 | H |
| 0.339656 | -0.328722 | -0.377878 | H |
| 0.713037 | -0.344806 | -0.993263 | H |
| 0.286963 | -0.655194 | -1.006737 | H |
| 0.705539 | -0.417827 | -1.021212 | H |
| 0.294461 | -0.582173 | -0.978788 | H |
| 0.651254 | -0.258289 | -1.052477 | H |
| 0.348746 | -0.741711 | -0.947523 | H |
| 0.643213 | -0.334317 | -1.073907 | H |
| 0.356787 | -0.665683 | -0.926093 | H |
| 0.715786 | -0.326275 | -1.163268 | H |
| 0.284214 | -0.673725 | -0.836732 | H |
| 0.681825 | -0.238796 | -1.194769 | H |
| 0.318175 | -0.761204 | -0.805231 | H |
| 0.753531 | -0.204607 | -1.211551 | H |
| 0.246469 | -0.795393 | -0.788449 | H |
| 0.716622 | -0.178181 | -1.137311 | H |
| 0.283378 | -0.821819 | -0.862689 | H |
| 0.752536 | -0.264311 | -1.109922 | H |
| 0.247464 | -0.735689 | -0.890078 | H |
| 0.614411 | -0.301232 | -0.897822 | H |
| 0.385589 | -0.698768 | -1.102178 | H |
| 0.614038 | -0.379996 | -0.803915 | H |

|          |           |           |   |
|----------|-----------|-----------|---|
| 0.385962 | -0.620004 | -1.196085 | H |
| 0.690371 | -0.360407 | -0.817273 | H |
| 0.309629 | -0.639593 | -1.182727 | H |
| 0.689071 | -0.278981 | -0.909481 | H |
| 0.310929 | -0.721019 | -1.090519 | H |
| 0.627896 | -0.293146 | -0.750791 | H |
| 0.372104 | -0.706854 | -1.249209 | H |
| 0.628209 | -0.211584 | -0.842827 | H |
| 0.371791 | -0.788416 | -1.157173 | H |
| 0.666432 | -0.186763 | -0.762872 | H |
| 0.333568 | -0.813237 | -1.237128 | H |
| 0.701705 | -0.272542 | -0.757327 | H |
| 0.298295 | -0.727458 | -1.242673 | H |
| 0.702485 | -0.189869 | -0.850428 | H |
| 0.297515 | -0.810131 | -1.149572 | H |
| 0.639896 | -0.439452 | -1.373587 | H |
| 0.360104 | -0.560548 | -0.626413 | H |
| 0.658567 | -0.346105 | -1.410942 | H |
| 0.341433 | -0.653895 | -0.589058 | H |
| 0.734565 | -0.408153 | -1.445957 | H |
| 0.265435 | -0.591847 | -0.554043 | H |
| 0.713213 | -0.498566 | -1.412014 | H |
| 0.286787 | -0.501434 | -0.587986 | H |
| 0.668286 | -0.434988 | -1.511242 | H |
| 0.331714 | -0.565012 | -0.488758 | H |
| 0.689694 | -0.34467  | -1.546609 | H |
| 0.310306 | -0.65533  | -0.453391 | H |
| 0.726608 | -0.415625 | -1.633657 | H |
| 0.273392 | -0.584375 | -0.366343 | H |
| 0.763015 | -0.407457 | -1.586829 | H |
| 0.236985 | -0.592543 | -0.413171 | H |
| 0.741384 | -0.498456 | -1.551184 | H |
| 0.258616 | -0.501544 | -0.448816 | H |
| 0.732345 | -0.524135 | -1.300005 | H |
| 0.267655 | -0.475865 | -0.699995 | H |
| 0.712081 | -0.537821 | -1.199087 | H |
| 0.287919 | -0.462179 | -0.800913 | H |
| 0.653709 | -0.60577  | -1.181199 | H |
| 0.346291 | -0.39423  | -0.818801 | H |
| 0.65989  | -0.576329 | -1.283554 | H |
| 0.34011  | -0.423671 | -0.716446 | H |
| 0.687321 | -0.719422 | -1.205399 | H |
| 0.312679 | -0.280578 | -0.794601 | H |

|          |           |           |   |
|----------|-----------|-----------|---|
| 0.728433 | -0.681739 | -1.195539 | H |
| 0.271567 | -0.318261 | -0.804461 | H |
| 0.752036 | -0.720271 | -1.310933 | H |
| 0.247964 | -0.279729 | -0.689067 | H |
| 0.711313 | -0.652626 | -1.354705 | H |
| 0.288687 | -0.347374 | -0.645295 | H |
| 0.754101 | -0.617708 | -1.344985 | H |
| 0.245899 | -0.382292 | -0.655015 | H |
| 0.72307  | -0.387647 | -1.247772 | H |
| 0.27693  | -0.612353 | -0.752228 | H |
| 0.74259  | -0.380651 | -1.346427 | H |
| 0.25741  | -0.619349 | -0.653573 | H |
| 0.687487 | -0.262641 | -1.390391 | H |
| 0.312513 | -0.737359 | -0.609609 | H |
| 0.672373 | -0.268701 | -1.29276  | H |
| 0.327627 | -0.731299 | -0.70724  | H |
| 0.761708 | -0.241043 | -1.402645 | H |
| 0.238292 | -0.758957 | -0.597355 | H |
| 0.746983 | -0.24638  | -1.305106 | H |
| 0.253017 | -0.75362  | -0.694894 | H |
| 0.745064 | -0.105164 | -1.402545 | H |
| 0.254936 | -0.894836 | -0.597455 | H |
| 0.709475 | -0.121992 | -1.445338 | H |
| 0.290525 | -0.878008 | -0.554662 | H |
| 0.692778 | -0.128512 | -1.346804 | H |
| 0.307222 | -0.871488 | -0.653196 | H |
| 0.605198 | -0.174132 | -1.149236 | H |
| 0.394802 | -0.825868 | -0.850764 | H |
| 0.63163  | -0.135994 | -1.251241 | H |
| 0.36837  | -0.864006 | -0.748759 | H |
| 0.571237 | -0.043954 | -1.158831 | H |
| 0.428763 | -0.956046 | -0.841169 | H |
| 0.595091 | -0.998339 | -1.261868 | H |
| 0.404909 | -0.001661 | -0.738132 | H |
| 0.631043 | -0.984608 | -1.170659 | H |
| 0.368957 | -0.015392 | -0.829341 | H |
| 0.642539 | -0.087792 | -1.128294 | H |
| 0.357461 | -0.912208 | -0.871706 | H |
| 0.705337 | -0.019572 | -1.230837 | H |
| 0.294663 | -0.980428 | -0.769163 | H |
| 0.688511 | -0.080825 | -1.261695 | H |
| 0.311489 | -0.919175 | -0.738305 | H |
| 0.675133 | -0.977093 | -1.304342 | H |

|          |           |           |   |
|----------|-----------|-----------|---|
| 0.324867 | -0.022907 | -0.695658 | H |
| 0.571867 | -0.036396 | -1.358228 | H |
| 0.428133 | -0.963604 | -0.641772 | H |
| 0.534483 | -0.096107 | -1.350542 | H |
| 0.465517 | -0.903893 | -0.649458 | H |
| 0.592774 | -0.198441 | -1.3658   | H |
| 0.407226 | -0.801559 | -0.6342   | H |
| 0.63085  | -0.14316  | -1.370822 | H |
| 0.36915  | -0.85684  | -0.629178 | H |
| 0.629696 | -0.12785  | -1.504496 | H |
| 0.370304 | -0.87215  | -0.495504 | H |
| 0.57602  | -0.089408 | -1.491365 | H |
| 0.42398  | -0.910592 | -0.508635 | H |
| 0.624797 | -0.981505 | -1.573392 | H |
| 0.375203 | -0.018495 | -0.426608 | H |
| 0.595437 | -0.972871 | -1.484553 | H |
| 0.404563 | -0.027129 | -0.515447 | H |
| 0.649405 | -0.012244 | -1.492921 | H |
| 0.350595 | -0.987756 | -0.507079 | H |
| 0.441251 | -0.006066 | -1.255503 | H |
| 0.558749 | -0.993934 | -0.744497 | H |
| 0.437235 | -0.016901 | -1.158464 | H |
| 0.562765 | -0.983099 | -0.841536 | H |
| 0.485366 | -0.129364 | -1.202856 | H |
| 0.514634 | -0.870636 | -0.797144 | H |
| 0.505253 | -0.128242 | -1.128354 | H |
| 0.494747 | -0.871758 | -0.871646 | H |
| 0.515054 | -0.988413 | -1.201636 | H |
| 0.484946 | -0.011587 | -0.798364 | H |
| 0.51699  | -0.988463 | -1.293418 | H |
| 0.48301  | -0.011537 | -0.706582 | H |
| 0.411203 | -0.878474 | -1.242496 | H |
| 0.588797 | -0.121526 | -0.757504 | H |
| 0.456179 | -0.87845  | -1.210711 | H |
| 0.543821 | -0.12155  | -0.789289 | H |
| 0.461948 | -0.866031 | -1.30955  | H |
| 0.538052 | -0.133969 | -0.69045  | H |
| 0.287131 | -0.30061  | -1.027251 | H |
| 0.712869 | -0.69939  | -0.972749 | H |
| 0.283158 | -0.21179  | -1.112984 | H |
| 0.716842 | -0.78821  | -0.887016 | H |
| 0.344626 | -0.170979 | -1.332253 | H |
| 0.655374 | -0.829021 | -0.667747 | H |

|          |           |           |   |
|----------|-----------|-----------|---|
| 0.297583 | -0.219983 | -1.277684 | H |
| 0.702417 | -0.780017 | -0.722316 | H |
| 0.311968 | -0.153229 | -1.249757 | H |
| 0.688032 | -0.846771 | -0.750243 | H |
| 0.297818 | -0.335479 | -1.136253 | H |
| 0.702182 | -0.664521 | -0.863747 | H |
| 0.344545 | -0.361411 | -1.101111 | H |
| 0.655455 | -0.638589 | -0.898889 | H |
| 0.363334 | -0.310686 | -1.243868 | H |
| 0.636666 | -0.689314 | -0.756132 | H |
| 0.37791  | -0.245632 | -1.21637  | H |
| 0.62209  | -0.754368 | -0.78363  | H |
| 0.378885 | -0.107845 | -1.122173 | H |
| 0.621115 | -0.892155 | -0.877827 | H |
| 0.373608 | -0.137109 | -1.19258  | H |
| 0.626392 | -0.862891 | -0.80742  | H |
| 0.30036  | -0.057135 | -1.100963 | H |
| 0.69964  | -0.942865 | -0.899037 | H |
| 0.295961 | -0.080138 | -1.176336 | H |
| 0.704039 | -0.919862 | -0.823664 | H |
| 0.305997 | -0.937887 | -1.219885 | H |
| 0.694003 | -0.062113 | -0.780115 | H |
| 0.356618 | -0.966495 | -1.198329 | H |
| 0.643382 | -0.033505 | -0.801671 | H |
| 0.362432 | -0.921849 | -1.343895 | H |
| 0.637568 | -0.078151 | -0.656105 | H |
| 0.380523 | -0.02347  | -1.301888 | H |
| 0.619477 | -0.97653  | -0.698112 | H |
| 0.329122 | -0.994703 | -1.321781 | H |
| 0.670878 | -0.005297 | -0.678219 | H |
| 0.277027 | -0.167165 | -1.001578 | H |
| 0.722973 | -0.832835 | -0.998422 | H |
| 0.29613  | -0.256954 | -0.931571 | H |
| 0.70387  | -0.743046 | -1.068429 | H |
| 0.339368 | -0.103818 | -0.99949  | H |
| 0.660632 | -0.896182 | -1.00051  | H |
| 0.347273 | -0.192312 | -0.916831 | H |
| 0.652727 | -0.807688 | -1.083169 | H |
| 0.268922 | -0.172314 | -0.850595 | H |
| 0.731078 | -0.827686 | -1.149405 | H |
| 0.264768 | -0.082263 | -0.933192 | H |
| 0.735232 | -0.917737 | -1.066808 | H |
| 0.275262 | -0.059069 | -0.822629 | H |

|          |           |           |   |
|----------|-----------|-----------|---|
| 0.724738 | -0.940931 | -1.177371 | H |
| 0.322948 | -0.122688 | -0.819236 | H |
| 0.677052 | -0.877312 | -1.180764 | H |
| 0.320127 | -0.031735 | -0.903717 | H |
| 0.679873 | -0.968265 | -1.096283 | H |
| 0.468766 | -0.979847 | -1.086797 | H |
| 0.531234 | -0.020153 | -0.913203 | H |
| 0.458025 | -0.980495 | -0.991903 | H |
| 0.541975 | -0.019505 | -1.008097 | H |
| 0.390771 | -0.11894  | -0.908433 | H |
| 0.609229 | -0.88106  | -1.091567 | H |
| 0.427695 | -0.097742 | -0.871911 | H |
| 0.572305 | -0.902258 | -1.128089 | H |
| 0.485979 | -0.112805 | -0.99077  | H |
| 0.514021 | -0.887195 | -1.00923  | H |
| 0.44406  | -0.114027 | -1.028623 | H |
| 0.55594  | -0.885973 | -0.971377 | H |
| 0.400872 | -0.90075  | -1.061447 | H |
| 0.599128 | -0.09925  | -0.938553 | H |
| 0.389892 | -0.984967 | -1.068459 | H |
| 0.610108 | -0.015033 | -0.931541 | H |
| 0.380256 | -0.981862 | -0.974398 | H |
| 0.619744 | -0.018138 | -1.025602 | H |
| 0.36633  | -0.25761  | -0.784611 | H |
| 0.63367  | -0.74239  | -1.215389 | H |
| 0.401916 | -0.325228 | -0.728201 | H |
| 0.598084 | -0.674772 | -1.271799 | H |
| 0.382094 | -0.15024  | -0.752518 | H |
| 0.617906 | -0.84976  | -1.247482 | H |
| 0.412933 | -0.223657 | -0.688646 | H |
| 0.587067 | -0.776343 | -1.311354 | H |
| 0.338015 | -0.191682 | -0.620986 | H |
| 0.661985 | -0.808318 | -1.379014 | H |
| 0.318582 | -0.22807  | -0.67286  | H |
| 0.681418 | -0.77193  | -1.32714  | H |
| 0.319577 | -0.331232 | -0.53672  | H |
| 0.680423 | -0.668768 | -1.46328  | H |
| 0.357902 | -0.363484 | -0.605847 | H |
| 0.642098 | -0.636516 | -1.394153 | H |
| 0.374465 | -0.324111 | -0.552637 | H |
| 0.625535 | -0.675889 | -1.447363 | H |
| 0.507988 | -0.203373 | -0.872062 | H |
| 0.492012 | -0.796627 | -1.127938 | H |



|          |           |           |   |
|----------|-----------|-----------|---|
| 0.473477 | -0.198662 | -0.783302 | H |
| 0.526523 | -0.801338 | -1.216698 | H |
| 0.476196 | -0.355597 | -0.730814 | H |
| 0.523804 | -0.644403 | -1.269186 | H |
| 0.519278 | -0.34376  | -0.813553 | H |
| 0.480722 | -0.65624  | -1.186447 | H |
| 0.554616 | -0.274501 | -0.76262  | H |
| 0.445384 | -0.725499 | -1.23738  | H |
| 0.548497 | -0.37552  | -0.701986 | H |
| 0.451503 | -0.62448  | -1.298014 | H |
| 0.528    | -0.300104 | -0.617967 | H |
| 0.472    | -0.699896 | -1.382033 | H |
| 0.489548 | -0.238478 | -0.671246 | H |
| 0.510452 | -0.761522 | -1.328754 | H |
| 0.48286  | -0.340523 | -0.613179 | H |
| 0.51714  | -0.659477 | -1.386821 | H |

## POSCAR file of the $\text{Au}_{32}(\text{}^n\text{Pr}_3\text{P})_{12}\text{Cl}_8$ assembly system

```

1
-6.50777 -7.497128 31.163662
-18.781919 0 0
-8.389586 -16.973016 0
Au Cl P C H
64 16 24 216 504
direct
0.993413 -0.946175 -1.150125 Au
0.93514 -0.876976 -1.051988 Au
0.96106 -0.744938 -1.055756 Au
0.97817 -0.781433 -1.210328 Au
0.893542 -0.836065 -0.927895 Au
0.907546 -0.919138 -1.153979 Au
0.859859 -0.955318 -0.959627 Au
0.932466 -0.040475 -1.019581 Au
0.949969 -0.202814 -0.992296 Au
0.958182 -0.061644 -1.160326 Au
0.067519 -0.959681 -0.980478 Au
0.049552 -0.797124 -1.007779 Au
0.041852 -0.938322 -0.83995 Au
0.973897 -0.148431 -1.900662 Au
0.93664 -0.140764 -1.75294 Au
0.882062 -0.121441 -1.866527 Au
0.924513 -0.000709 -1.886098 Au

```

|          |           |           |    |
|----------|-----------|-----------|----|
| 0.025943 | -0.852448 | -0.099132 | Au |
| 0.063393 | -0.859266 | -0.246984 | Au |
| 0.117884 | -0.878641 | -0.133485 | Au |
| 0.075566 | -0.999889 | -0.113945 | Au |
| 0.01878  | -0.112221 | -0.06383  | Au |
| 0.054289 | -0.028144 | -0.227669 | Au |
| 0.981075 | -0.888    | -1.936213 | Au |
| 0.946027 | -0.972584 | -1.772413 | Au |
| 0.006654 | -0.054082 | -0.850246 | Au |
| 0.064816 | -0.123135 | -0.94803  | Au |
| 0.039006 | -0.255189 | -0.944088 | Au |
| 0.021848 | -0.218684 | -0.789608 | Au |
| 0.106202 | -0.164558 | -1.071757 | Au |
| 0.092462 | -0.080925 | -0.846053 | Au |
| 0.140138 | -0.044705 | -1.040364 | Au |
| 0.572431 | -0.416061 | -1.053597 | Au |
| 0.427565 | -0.583934 | -0.946402 | Au |
| 0.489385 | -0.338547 | -1.049593 | Au |
| 0.510591 | -0.661419 | -0.950422 | Au |
| 0.42744  | -0.447363 | -0.915384 | Au |
| 0.572556 | -0.552631 | -1.084627 | Au |
| 0.474756 | -0.591614 | -0.833616 | Au |
| 0.525244 | -0.408386 | -1.166383 | Au |
| 0.561301 | -0.573577 | -0.924152 | Au |
| 0.438695 | -0.426419 | -1.075848 | Au |
| 0.512123 | -0.442776 | -0.902243 | Au |
| 0.487876 | -0.557222 | -1.097761 | Au |
| 0.639071 | -0.534475 | -1.036998 | Au |
| 0.360928 | -0.465523 | -0.963003 | Au |
| 0.61286  | -0.414197 | -1.203937 | Au |
| 0.387138 | -0.5858   | -0.796059 | Au |
| 0.559282 | -0.277979 | -1.186306 | Au |
| 0.440718 | -0.722021 | -0.813693 | Au |
| 0.465131 | -0.275845 | -1.190349 | Au |
| 0.534865 | -0.724175 | -0.809664 | Au |
| 0.401    | -0.304175 | -1.033136 | Au |
| 0.598981 | -0.695715 | -0.966964 | Au |
| 0.45078  | -0.316798 | -0.907769 | Au |
| 0.549199 | -0.683266 | -1.092221 | Au |
| 0.545603 | -0.295914 | -0.998149 | Au |
| 0.454394 | -0.70409  | -1.001853 | Au |
| 0.440879 | -0.475422 | -0.771967 | Au |
| 0.55912  | -0.524577 | -1.228036 | Au |

|          |           |           |    |
|----------|-----------|-----------|----|
| 0.59907  | -0.466354 | -0.907991 | Au |
| 0.400923 | -0.533659 | -1.092    | Au |
| 0.538742 | -0.571788 | -0.773225 | Au |
| 0.461258 | -0.428214 | -1.226785 | Au |
| 0.788102 | -0.916969 | -0.96673  | Cl |
| 0.959583 | -0.666845 | -1.319363 | Cl |
| 0.919919 | -0.310214 | -0.986692 | Cl |
| 0.079235 | -0.689242 | -1.013618 | Cl |
| 0.078513 | -0.047956 | -0.348181 | Cl |
| 0.921746 | -0.952329 | -1.652091 | Cl |
| 0.211889 | -0.082992 | -1.033241 | Cl |
| 0.040498 | -0.333301 | -0.680598 | Cl |
| 0.421705 | -0.480095 | -0.639996 | Cl |
| 0.578286 | -0.519852 | -1.360028 | Cl |
| 0.714418 | -0.540066 | -1.06307  | Cl |
| 0.285583 | -0.459923 | -0.936923 | Cl |
| 0.573262 | -0.19233  | -0.99229  | Cl |
| 0.426711 | -0.807689 | -1.007655 | Cl |
| 0.454975 | -0.161701 | -1.307109 | Cl |
| 0.545036 | -0.838383 | -0.692982 | Cl |
| 0.836919 | -0.799178 | -0.843898 | P  |
| 0.971322 | -0.614373 | -1.135174 | P  |
| 0.856263 | -0.836514 | -1.21923  | P  |
| 0.957468 | -0.134819 | -1.228343 | P  |
| 0.042583 | -0.865205 | -0.771902 | P  |
| 0.908978 | -0.204677 | -1.618643 | P  |
| 0.091068 | -0.795342 | -0.381304 | P  |
| 0.163038 | -0.200921 | -1.155941 | P  |
| 0.028639 | -0.385707 | -0.864799 | P  |
| 0.14373  | -0.163509 | -0.780707 | P  |
| 0.833289 | -0.207036 | -0.838619 | P  |
| 0.166593 | -0.792935 | -1.161326 | P  |
| 0.528029 | -0.64039  | -0.635574 | P  |
| 0.471967 | -0.359685 | -1.364471 | P  |
| 0.656952 | -0.419225 | -0.904988 | P  |
| 0.34303  | -0.580756 | -1.094995 | P  |
| 0.675515 | -0.427596 | -1.291119 | P  |
| 0.324483 | -0.572362 | -0.708882 | P  |
| 0.562233 | -0.14376  | -1.236853 | P  |
| 0.437776 | -0.856243 | -0.763143 | P  |
| 0.343542 | -0.216542 | -1.062625 | P  |
| 0.656443 | -0.7834   | -0.937385 | P  |
| 0.43785  | -0.232481 | -0.845826 | P  |

|          |           |           |   |
|----------|-----------|-----------|---|
| 0.562154 | -0.76752  | -1.154202 | P |
| 0.796047 | -0.870472 | -1.791415 | C |
| 0.811491 | -0.951745 | -1.733777 | C |
| 0.775898 | -0.008105 | -1.692872 | C |
| 0.851509 | -0.785401 | -1.764987 | C |
| 0.814499 | -0.768471 | -1.702047 | C |
| 0.830709 | -0.75618  | -1.640897 | C |
| 0.807101 | -0.705943 | -0.89565  | C |
| 0.835118 | -0.636242 | -0.945241 | C |
| 0.809686 | -0.55839  | -0.985412 | C |
| 0.976466 | -0.55931  | -1.07999  | C |
| 0.937226 | -0.563883 | -1.010966 | C |
| 0.94113  | -0.520652 | -0.962143 | C |
| 0.926588 | -0.563296 | -1.183225 | C |
| 0.928627 | -0.47543  | -1.240977 | C |
| 0.887558 | -0.44186  | -1.270999 | C |
| 0.019345 | -0.601586 | -0.217697 | C |
| 0.039034 | -0.521684 | -0.257286 | C |
| 0.06785  | -0.508434 | -0.340726 | C |
| 0.815185 | -0.885895 | -1.224886 | C |
| 0.832939 | -0.942264 | -1.26675  | C |
| 0.79781  | -0.975805 | -1.278135 | C |
| 0.824067 | -0.770284 | -1.17328  | C |
| 0.849386 | -0.717621 | -1.16231  | C |
| 0.819522 | -0.662359 | -1.126826 | C |
| 0.879645 | -0.772806 | -1.324358 | C |
| 0.848354 | -0.715536 | -1.374128 | C |
| 0.871718 | -0.665009 | -1.459976 | C |
| 0.999412 | -0.217272 | -1.211566 | C |
| 0.015687 | -0.250173 | -0.27635  | C |
| 0.047595 | -0.322468 | -0.251327 | C |
| 0.965952 | -0.080396 | -1.337991 | C |
| 0.932323 | -0.011352 | -1.363828 | C |
| 0.939339 | -0.968733 | -1.455447 | C |
| 0.906135 | -0.178472 | -1.192596 | C |
| 0.899943 | -0.233325 | -1.22788  | C |
| 0.854733 | -0.261008 | -1.193547 | C |
| 0.000621 | -0.782797 | -0.788598 | C |
| 0.984379 | -0.749876 | -1.723836 | C |
| 0.952489 | -0.677556 | -1.748874 | C |
| 0.034105 | -0.919539 | -0.662243 | C |
| 0.067727 | -0.988576 | -0.636307 | C |
| 0.06069  | -0.031126 | -0.544676 | C |

|          |           |           |   |
|----------|-----------|-----------|---|
| 0.093916 | -0.821518 | -0.80777  | C |
| 0.100099 | -0.766765 | -0.772367 | C |
| 0.145249 | -0.738824 | -0.806861 | C |
| 0.870749 | -0.14061  | -1.575335 | C |
| 0.864639 | -0.160926 | -1.485639 | C |
| 0.834255 | -0.098176 | -1.461916 | C |
| 0.882619 | -0.292638 | -1.594443 | C |
| 0.861645 | -0.34148  | -1.506156 | C |
| 0.84194  | -0.412948 | -1.496937 | C |
| 0.951234 | -0.242054 | -1.563343 | C |
| 0.979647 | -0.177941 | -1.581259 | C |
| 0.012567 | -0.21114  | -0.52971  | C |
| 0.129302 | -0.859376 | -0.424644 | C |
| 0.135404 | -0.839016 | -0.514349 | C |
| 0.165768 | -0.901758 | -0.538112 | C |
| 0.117415 | -0.707354 | -0.405524 | C |
| 0.138366 | -0.658485 | -0.493815 | C |
| 0.158075 | -0.587019 | -0.503031 | C |
| 0.048795 | -0.757961 | -0.436581 | C |
| 0.020367 | -0.822043 | -0.418698 | C |
| 0.9874   | -0.78878  | -1.470156 | C |
| 0.203873 | -0.129536 | -0.208377 | C |
| 0.188478 | -0.048302 | -0.266153 | C |
| 0.224087 | -0.991976 | -0.307001 | C |
| 0.148565 | -0.214706 | -0.234953 | C |
| 0.185585 | -0.231613 | -0.297889 | C |
| 0.169352 | -0.243807 | -0.359071 | C |
| 0.192912 | -0.294092 | -1.104156 | C |
| 0.164917 | -0.363827 | -1.054646 | C |
| 0.190359 | -0.44167  | -1.014469 | C |
| 0.023484 | -0.440682 | -0.920076 | C |
| 0.062728 | -0.436076 | -0.989122 | C |
| 0.058828 | -0.479231 | -1.038016 | C |
| 0.073341 | -0.436798 | -0.816667 | C |
| 0.071346 | -0.524662 | -0.758928 | C |
| 0.112434 | -0.558153 | -0.728957 | C |
| 0.980586 | -0.398433 | -1.782363 | C |
| 0.960939 | -0.47837  | -1.742703 | C |
| 0.932131 | -0.491602 | -1.659259 | C |
| 0.184812 | -0.114126 | -0.775069 | C |
| 0.167058 | -0.057735 | -0.733232 | C |
| 0.202185 | -0.024184 | -0.721858 | C |
| 0.175925 | -0.229714 | -0.82669  | C |

|          |           |           |   |
|----------|-----------|-----------|---|
| 0.150599 | -0.282369 | -0.83766  | C |
| 0.180449 | -0.337665 | -0.87311  | C |
| 0.120325 | -0.227182 | -0.675568 | C |
| 0.151546 | -0.284505 | -0.625623 | C |
| 0.12811  | -0.335045 | -0.539823 | C |
| 0.849293 | -0.313379 | -1.790462 | C |
| 0.816343 | -0.369795 | -1.77293  | C |
| 0.832658 | -0.456833 | -1.733899 | C |
| 0.781286 | -0.190812 | -1.774801 | C |
| 0.782757 | -0.211837 | -1.688129 | C |
| 0.739219 | -0.197998 | -1.63641  | C |
| 0.819554 | -0.196235 | -0.929745 | C |
| 0.810415 | -0.110319 | -0.986993 | C |
| 0.793098 | -0.105933 | -1.055156 | C |
| 0.150654 | -0.686584 | -0.209537 | C |
| 0.183637 | -0.63021  | -0.227093 | C |
| 0.167338 | -0.543163 | -0.266098 | C |
| 0.218648 | -0.809231 | -0.224986 | C |
| 0.217231 | -0.788222 | -0.31169  | C |
| 0.260768 | -0.802134 | -0.363371 | C |
| 0.180144 | -0.803689 | -1.070066 | C |
| 0.189343 | -0.88959  | -1.012866 | C |
| 0.206753 | -0.894045 | -0.944774 | C |
| 0.526759 | -0.580449 | -0.580906 | C |
| 0.473284 | -0.419596 | -1.419194 | C |
| 0.568334 | -0.541186 | -0.606938 | C |
| 0.431808 | -0.459157 | -1.393134 | C |
| 0.568074 | -0.49604  | -1.557105 | C |
| 0.4322   | -0.504353 | -0.443008 | C |
| 0.569916 | -0.720725 | -0.606813 | C |
| 0.430047 | -0.279427 | -1.393212 | C |
| 0.566272 | -0.772985 | -1.516913 | C |
| 0.433723 | -0.22703  | -0.483092 | C |
| 0.60523  | -0.832778 | -1.503101 | C |
| 0.394771 | -0.167214 | -0.496879 | C |
| 0.476956 | -0.686428 | -0.592662 | C |
| 0.52303  | -0.313578 | -1.407361 | C |
| 0.456035 | -0.704342 | -0.50382  | C |
| 0.543978 | -0.295663 | -1.496192 | C |
| 0.415144 | -0.746101 | -0.475605 | C |
| 0.584786 | -0.253663 | -1.524454 | C |
| 0.692316 | -0.496052 | -0.845835 | C |
| 0.307742 | -0.503823 | -1.154258 | C |

|          |           |           |   |
|----------|-----------|-----------|---|
| 0.670614 | -0.540974 | -0.757238 | C |
| 0.329617 | -0.458978 | -1.242772 | C |
| 0.700628 | -0.606409 | -0.710884 | C |
| 0.299871 | -0.393063 | -1.289381 | C |
| 0.693626 | -0.373826 | -1.003018 | C |
| 0.306351 | -0.626138 | -0.996969 | C |
| 0.672959 | -0.307739 | -1.068025 | C |
| 0.327022 | -0.692248 | -0.931974 | C |
| 0.70612  | -0.273556 | -1.147342 | C |
| 0.293883 | -0.726359 | -0.852612 | C |
| 0.64132  | -0.345264 | -0.861881 | C |
| 0.358664 | -0.654713 | -1.138106 | C |
| 0.677409 | -0.307761 | -0.858026 | C |
| 0.322581 | -0.692228 | -1.141964 | C |
| 0.65987  | -0.248614 | -0.819315 | C |
| 0.340128 | -0.751372 | -1.180677 | C |
| 0.667127 | -0.4092   | -1.389339 | C |
| 0.332863 | -0.590776 | -0.610653 | C |
| 0.705011 | -0.431204 | -1.447672 | C |
| 0.294982 | -0.568776 | -0.552315 | C |
| 0.693244 | -0.41386  | -1.526162 | C |
| 0.306768 | -0.586091 | -0.473846 | C |
| 0.705733 | -0.524383 | -1.259006 | C |
| 0.294269 | -0.475569 | -0.741004 | C |
| 0.682319 | -0.593273 | -1.245724 | C |
| 0.317679 | -0.406673 | -0.754295 | C |
| 0.713382 | -0.666605 | -1.239195 | C |
| 0.286612 | -0.333345 | -0.760826 | C |
| 0.715866 | -0.360938 | -1.313833 | C |
| 0.284129 | -0.639011 | -0.68617  | C |
| 0.699805 | -0.273239 | -1.344184 | C |
| 0.300195 | -0.726709 | -0.655842 | C |
| 0.735013 | -0.219485 | -1.367172 | C |
| 0.264992 | -0.780476 | -0.632834 | C |
| 0.60649  | -0.120656 | -1.212055 | C |
| 0.393511 | -0.879334 | -0.787929 | C |
| 0.610218 | -0.034916 | -1.228203 | C |
| 0.389779 | -0.965071 | -0.771782 | C |
| 0.568736 | -0.09188  | -1.346543 | C |
| 0.431277 | -0.908094 | -0.65345  | C |
| 0.605061 | -0.128572 | -1.394854 | C |
| 0.39495  | -0.871393 | -0.605143 | C |
| 0.609961 | -0.081213 | -1.485732 | C |

|          |           |           |   |
|----------|-----------|-----------|---|
| 0.390039 | -0.91876  | -0.514265 | C |
| 0.455186 | -0.983038 | -1.22706  | C |
| 0.54478  | -0.01707  | -0.772789 | C |
| 0.511686 | -0.098009 | -1.196111 | C |
| 0.488321 | -0.90203  | -0.80386  | C |
| 0.503031 | -0.007257 | -1.234354 | C |
| 0.496947 | -0.992791 | -0.765609 | C |
| 0.304772 | -0.256374 | -1.085427 | C |
| 0.695204 | -0.743563 | -0.914558 | C |
| 0.322261 | -0.298179 | -1.142442 | C |
| 0.677737 | -0.701767 | -0.857544 | C |
| 0.340998 | -0.244401 | -1.229898 | C |
| 0.659042 | -0.755548 | -0.770069 | C |
| 0.359718 | -0.122268 | -1.147119 | C |
| 0.64029  | -0.877706 | -0.852902 | C |
| 0.323701 | -0.060323 | -1.176684 | C |
| 0.676315 | -0.939651 | -0.823351 | C |
| 0.341247 | -0.98186  | -1.240849 | C |
| 0.658774 | -0.018107 | -0.759144 | C |
| 0.309568 | -0.1881   | -0.982415 | C |
| 0.690445 | -0.811839 | -1.017584 | C |
| 0.332226 | -0.146227 | -0.953687 | C |
| 0.667798 | -0.853759 | -1.046282 | C |
| 0.300954 | -0.111554 | -0.89739  | C |
| 0.699064 | -0.888422 | -1.1026   | C |
| 0.447539 | -0.000384 | -1.024961 | C |
| 0.552464 | -0.999568 | -0.975031 | C |
| 0.42566  | -0.12585  | -0.901873 | C |
| 0.574352 | -0.874138 | -1.098137 | C |
| 0.454422 | -0.090768 | -0.986661 | C |
| 0.545572 | -0.909187 | -1.013365 | C |
| 0.393648 | -0.262388 | -0.755805 | C |
| 0.606351 | -0.737571 | -1.24423  | C |
| 0.38539  | -0.218043 | -0.701653 | C |
| 0.614607 | -0.78186  | -1.298427 | C |
| 0.346414 | -0.246208 | -0.631526 | C |
| 0.653582 | -0.753688 | -1.368546 | C |
| 0.484288 | -0.233096 | -0.810993 | C |
| 0.51571  | -0.766939 | -1.189004 | C |
| 0.502858 | -0.315242 | -0.761064 | C |
| 0.497124 | -0.684805 | -1.238939 | C |
| 0.537597 | -0.308281 | -0.726441 | C |
| 0.462396 | -0.6918   | -1.273567 | C |



|          |           |           |   |
|----------|-----------|-----------|---|
| 0.64899  | -0.029686 | -1.202124 | C |
| 0.351007 | -0.9703   | -0.797861 | C |
| 0.767893 | -0.843969 | -1.759032 | H |
| 0.786114 | -0.876524 | -0.839564 | H |
| 0.839365 | -0.976707 | -1.768243 | H |
| 0.823419 | -0.945846 | -1.687809 | H |
| 0.786588 | -0.067125 | -1.650573 | H |
| 0.765177 | -0.01668  | -1.738512 | H |
| 0.871832 | -0.839386 | -1.735536 | H |
| 0.873134 | -0.736482 | -1.797197 | H |
| 0.793862 | -0.818804 | -1.669928 | H |
| 0.793853 | -0.715427 | -1.731752 | H |
| 0.85134  | -0.808675 | -1.61066  | H |
| 0.850029 | -0.704218 | -1.67086  | H |
| 0.792289 | -0.71675  | -0.935183 | H |
| 0.780439 | -0.693313 | -0.849744 | H |
| 0.85205  | -0.629435 | -0.906136 | H |
| 0.860672 | -0.651234 | -0.991032 | H |
| 0.791929 | -0.563022 | -1.02438  | H |
| 0.785654 | -0.541063 | -0.93977  | H |
| 0.005713 | -0.586511 | -0.056518 | H |
| 0.982121 | -0.496742 | -1.12268  | H |
| 0.932449 | -0.62751  | -0.971461 | H |
| 0.908174 | -0.538937 | -1.035333 | H |
| 0.970017 | -0.544238 | -1.937466 | H |
| 0.943337 | -0.456061 | -0.998881 | H |
| 0.923919 | -0.598774 | -1.215139 | H |
| 0.897567 | -0.572035 | -1.133034 | H |
| 0.956158 | -0.468474 | -1.293376 | H |
| 0.934223 | -0.44058  | -1.210926 | H |
| 0.882133 | -0.474615 | -1.303097 | H |
| 0.859337 | -0.447169 | -1.220165 | H |
| 0.042976 | -0.651264 | -0.193297 | H |
| 0.009318 | -0.613699 | -0.262186 | H |
| 0.057385 | -0.519657 | -0.21772  | H |
| 0.013825 | -0.471996 | -0.263181 | H |
| 0.09344  | -0.55726  | -0.337039 | H |
| 0.08338  | -0.452096 | -0.369037 | H |
| 0.797314 | -0.917753 | -1.161792 | H |
| 0.792275 | -0.838853 | -1.256225 | H |
| 0.85371  | -0.990803 | -1.231186 | H |
| 0.854245 | -0.910821 | -1.326517 | H |
| 0.811417 | -0.016416 | -1.308615 | H |

|          |           |           |   |
|----------|-----------|-----------|---|
| 0.776404 | -0.009322 | -1.219587 | H |
| 0.800839 | -0.733809 | -1.210708 | H |
| 0.805472 | -0.809683 | -1.113532 | H |
| 0.870872 | -0.682883 | -1.220532 | H |
| 0.870907 | -0.756043 | -1.121749 | H |
| 0.798193 | -0.696658 | -1.06844  | H |
| 0.837604 | -0.625965 | -1.11603  | H |
| 0.903597 | -0.739983 | -1.322101 | H |
| 0.898529 | -0.813013 | -1.352888 | H |
| 0.829692 | -0.676194 | -1.344414 | H |
| 0.824751 | -0.748825 | -1.376371 | H |
| 0.889748 | -0.702704 | -1.4919   | H |
| 0.895023 | -0.630399 | -1.459123 | H |
| 0.026241 | -0.194721 | -0.205025 | H |
| 0.986346 | -0.26366  | -1.151151 | H |
| 0.03123  | -0.203074 | -0.33355  | H |
| 0.988712 | -0.266219 | -1.289069 | H |
| 0.074967 | -0.307445 | -0.238976 | H |
| 0.032692 | -0.371601 | -0.195545 | H |
| 0.998511 | -0.059255 | -1.35937  | H |
| 0.966677 | -0.122951 | -1.364294 | H |
| 0.93285  | -0.969611 | -1.337323 | H |
| 0.899922 | -0.03337  | -1.337562 | H |
| 0.937023 | -0.008578 | -1.482653 | H |
| 0.97138  | -0.945717 | -1.483521 | H |
| 0.902074 | -0.210735 | -1.126041 | H |
| 0.881369 | -0.127637 | -1.202496 | H |
| 0.923559 | -0.285678 | -1.213689 | H |
| 0.906337 | -0.202829 | -1.294754 | H |
| 0.849966 | -0.301474 | -1.217926 | H |
| 0.830444 | -0.20991  | -1.208033 | H |
| 0.973787 | -0.805381 | -1.795081 | H |
| 0.013655 | -0.736404 | -0.849039 | H |
| 0.96883  | -0.796951 | -1.666623 | H |
| 0.011364 | -0.733842 | -0.711142 | H |
| 0.925084 | -0.692587 | -1.761128 | H |
| 0.967376 | -0.628453 | -1.804704 | H |
| 0.001544 | -0.940669 | -0.640843 | H |
| 0.033381 | -0.87692  | -0.636011 | H |
| 0.067204 | -0.030379 | -0.66274  | H |
| 0.100133 | -0.96658  | -0.662565 | H |
| 0.06301  | -0.991259 | -0.517499 | H |
| 0.028639 | -0.054107 | -0.516607 | H |

|          |           |           |   |
|----------|-----------|-----------|---|
| 0.097897 | -0.789155 | -0.874298 | H |
| 0.118706 | -0.87231  | -0.798017 | H |
| 0.076405 | -0.714521 | -0.786309 | H |
| 0.093813 | -0.797424 | -0.705513 | H |
| 0.149984 | -0.6984   | -0.782404 | H |
| 0.16962  | -0.789805 | -0.792547 | H |
| 0.839951 | -0.138061 | -1.589955 | H |
| 0.882176 | -0.080112 | -1.611557 | H |
| 0.852679 | -0.220548 | -1.447328 | H |
| 0.896133 | -0.163725 | -1.473573 | H |
| 0.846776 | -0.038939 | -1.498768 | H |
| 0.802182 | -0.094648 | -1.471872 | H |
| 0.907759 | -0.329753 | -1.619628 | H |
| 0.858843 | -0.271136 | -1.632161 | H |
| 0.885539 | -0.36195  | -1.468879 | H |
| 0.836591 | -0.303465 | -1.482269 | H |
| 0.817053 | -0.393775 | -1.531941 | H |
| 0.866442 | -0.452564 | -1.519275 | H |
| 0.970985 | -0.288828 | -1.581996 | H |
| 0.936394 | -0.27074  | -1.497726 | H |
| 0.995971 | -0.154869 | -1.646425 | H |
| 0.96008  | -0.126069 | -1.572087 | H |
| 0.033981 | -0.165686 | -0.543923 | H |
| 0.032563 | -0.261863 | -0.540175 | H |
| 0.160097 | -0.861933 | -0.41002  | H |
| 0.117878 | -0.919881 | -0.38845  | H |
| 0.147369 | -0.779395 | -0.552636 | H |
| 0.103907 | -0.83618  | -0.526421 | H |
| 0.153246 | -0.96099  | -0.501277 | H |
| 0.19785  | -0.905299 | -0.528181 | H |
| 0.092279 | -0.670256 | -0.380309 | H |
| 0.141206 | -0.728851 | -0.367839 | H |
| 0.114455 | -0.638004 | -0.53106  | H |
| 0.163413 | -0.696479 | -0.517743 | H |
| 0.182972 | -0.606197 | -0.468048 | H |
| 0.133575 | -0.54741  | -0.480677 | H |
| 0.029047 | -0.711198 | -0.417908 | H |
| 0.063631 | -0.729247 | -0.5022   | H |
| 0.00408  | -0.845199 | -0.353514 | H |
| 0.039927 | -0.873865 | -0.42799  | H |
| 0.965988 | -0.834228 | -1.455962 | H |
| 0.967409 | -0.738105 | -1.459581 | H |
| 0.232057 | -0.156091 | -0.240654 | H |

|          |           |           |   |
|----------|-----------|-----------|---|
| 0.213758 | -0.123405 | -1.160221 | H |
| 0.160578 | -0.02327  | -0.231796 | H |
| 0.1766   | -0.054264 | -0.312141 | H |
| 0.213429 | -0.93297  | -0.349374 | H |
| 0.234757 | -0.983358 | -0.261332 | H |
| 0.128237 | -0.160733 | -0.264415 | H |
| 0.126942 | -0.263631 | -0.202792 | H |
| 0.20624  | -0.181311 | -0.329959 | H |
| 0.206207 | -0.284703 | -0.268187 | H |
| 0.148733 | -0.191266 | -0.389271 | H |
| 0.149994 | -0.29572  | -0.329111 | H |
| 0.207659 | -0.283248 | -1.064564 | H |
| 0.219616 | -0.30668  | -1.15003  | H |
| 0.148016 | -0.370616 | -1.09381  | H |
| 0.139331 | -0.348865 | -1.008873 | H |
| 0.208085 | -0.437029 | -0.975464 | H |
| 0.214411 | -0.458956 | -1.060115 | H |
| 0.994236 | -0.413452 | -1.943536 | H |
| 0.017819 | -0.503261 | -0.877434 | H |
| 0.067508 | -0.372439 | -1.028568 | H |
| 0.091774 | -0.461054 | -0.96474  | H |
| 0.02995  | -0.4556   | -0.062722 | H |
| 0.056601 | -0.543822 | -1.001327 | H |
| 0.075969 | -0.401306 | -0.784733 | H |
| 0.102377 | -0.428022 | -0.866832 | H |
| 0.043825 | -0.531683 | -0.706502 | H |
| 0.06577  | -0.559543 | -0.788968 | H |
| 0.117847 | -0.52536  | -0.696885 | H |
| 0.140646 | -0.552796 | -0.77982  | H |
| 0.956952 | -0.348807 | -1.806847 | H |
| 0.990571 | -0.386205 | -1.737902 | H |
| 0.942592 | -0.480503 | -1.782216 | H |
| 0.986171 | -0.528029 | -1.736784 | H |
| 0.906531 | -0.442792 | -1.662957 | H |
| 0.916618 | -0.547963 | -1.630894 | H |
| 0.202691 | -0.082298 | -0.838164 | H |
| 0.207711 | -0.161175 | -0.743702 | H |
| 0.146288 | -0.009205 | -0.768809 | H |
| 0.145749 | -0.089168 | -0.673463 | H |
| 0.18858  | -0.983553 | -0.691402 | H |
| 0.223597 | -0.990691 | -0.78041  | H |
| 0.199155 | -0.266201 | -0.78927  | H |
| 0.194511 | -0.190295 | -0.886433 | H |

|          |           |           |   |
|----------|-----------|-----------|---|
| 0.129104 | -0.317087 | -0.779439 | H |
| 0.129083 | -0.243948 | -0.878231 | H |
| 0.201791 | -0.303402 | -0.931494 | H |
| 0.162357 | -0.374056 | -0.883891 | H |
| 0.096378 | -0.259995 | -0.67786  | H |
| 0.101418 | -0.186942 | -0.647096 | H |
| 0.170238 | -0.323857 | -0.655307 | H |
| 0.175128 | -0.251249 | -0.623279 | H |
| 0.110063 | -0.297361 | -0.507898 | H |
| 0.104822 | -0.369622 | -0.540774 | H |
| 0.87906  | -0.323033 | -1.833054 | H |
| 0.858509 | -0.324056 | -1.734642 | H |
| 0.808428 | -0.358273 | -0.830092 | H |
| 0.786066 | -0.357737 | -1.733072 | H |
| 0.862473 | -0.470504 | -1.773351 | H |
| 0.83981  | -0.471055 | -1.675421 | H |
| 0.770607 | -0.127148 | -0.804941 | H |
| 0.758087 | -0.225804 | -0.775849 | H |
| 0.794835 | -0.275064 | -1.66014  | H |
| 0.806429 | -0.17621  | -1.689543 | H |
| 0.727448 | -0.134525 | -1.659992 | H |
| 0.715073 | -0.232074 | -1.635527 | H |
| 0.846916 | -0.226198 | -0.959969 | H |
| 0.791334 | -0.23059  | -0.909863 | H |
| 0.840284 | -0.07941  | -1.011987 | H |
| 0.787557 | -0.077049 | -0.954112 | H |
| 0.786484 | -0.043589 | -1.096297 | H |
| 0.81619  | -0.135546 | -1.091451 | H |
| 0.120885 | -0.676865 | -0.166982 | H |
| 0.141437 | -0.675891 | -0.265362 | H |
| 0.19158  | -0.641756 | -1.169949 | H |
| 0.213895 | -0.642293 | -0.266976 | H |
| 0.137534 | -0.529475 | -0.226644 | H |
| 0.160178 | -0.528912 | -0.324579 | H |
| 0.229319 | -0.872893 | -1.19482  | H |
| 0.241832 | -0.774229 | -1.223907 | H |
| 0.20517  | -0.724986 | -0.339724 | H |
| 0.193553 | -0.823826 | -0.310298 | H |
| 0.272523 | -0.865609 | -0.33977  | H |
| 0.284924 | -0.768046 | -0.364306 | H |
| 0.152712 | -0.773805 | -1.03989  | H |
| 0.208319 | -0.769253 | -1.089814 | H |
| 0.159498 | -0.920578 | -0.987803 | H |

|          |           |           |   |
|----------|-----------|-----------|---|
| 0.212193 | -0.9228   | -1.045826 | H |
| 0.213383 | -0.956407 | -0.903692 | H |
| 0.183718 | -0.864458 | -0.908395 | H |
| 0.83021  | -0.111575 | -1.397469 | H |
| 0.996988 | -0.232563 | -1.464405 | H |
| 0.826894 | -0.448543 | -1.433111 | H |
| 0.747695 | -0.984576 | -1.65804  | H |
| 0.803977 | -0.746148 | -1.593982 | H |
| 0.83076  | -0.509173 | -1.022807 | H |
| 0.79869  | -0.621048 | -1.167134 | H |
| 0.888876 | -0.378347 | -1.313042 | H |
| 0.913078 | -0.527559 | -1.910742 | H |
| 0.049218 | -0.50661  | -0.381654 | H |
| 0.849237 | -0.622855 | -1.495955 | H |
| 0.77779  | -0.927696 | -1.315613 | H |
| 0.915312 | -0.917903 | -1.473662 | H |
| 0.848238 | -0.292893 | -1.126972 | H |
| 0.060415 | -0.34501  | -0.299011 | H |
| 0.808897 | -0.497155 | -1.722545 | H |
| 0.740673 | -0.216213 | -1.573179 | H |
| 0.762845 | -0.13522  | -1.031463 | H |
| 0.95077  | -0.493361 | -1.61837  | H |
| 0.086887 | -0.472301 | -0.089404 | H |
| 0.111157 | -0.621667 | -0.686909 | H |
| 0.150565 | -0.377229 | -0.503796 | H |
| 0.201271 | -0.378981 | -0.832781 | H |
| 0.222201 | -0.072287 | -0.684365 | H |
| 0.084697 | -0.081977 | -0.526399 | H |
| 0.151666 | -0.706822 | -0.873416 | H |
| 0.939703 | -0.654977 | -1.701211 | H |
| 0.191117 | -0.50287  | -0.277456 | H |
| 0.259303 | -0.783938 | -0.426594 | H |
| 0.237018 | -0.864782 | -0.96855  | H |
| 0.173109 | -0.551414 | -0.566859 | H |
| 0.00294  | -0.767272 | -0.535481 | H |
| 0.169804 | -0.88832  | -0.602567 | H |
| 0.196061 | -0.253867 | -0.405999 | H |
| 0.16929  | -0.490902 | -0.977122 | H |
| 0.252313 | -0.015559 | -0.341735 | H |
| 0.499121 | -0.535491 | -0.592233 | H |
| 0.500996 | -0.464404 | -1.407986 | H |
| 0.519729 | -0.618947 | -1.515176 | H |
| 0.480256 | -0.381024 | -0.484906 | H |

|          |           |           |   |
|----------|-----------|-----------|---|
| 0.595865 | -0.586813 | -0.601491 | H |
| 0.40419  | -0.413719 | -1.398484 | H |
| 0.573561 | -0.501196 | -0.672236 | H |
| 0.426649 | -0.499193 | -1.327853 | H |
| 0.565266 | -0.535863 | -1.492407 | H |
| 0.434931 | -0.464493 | -0.507678 | H |
| 0.540811 | -0.450254 | -0.56085  | H |
| 0.459553 | -0.549945 | -1.439353 | H |
| 0.57039  | -0.757383 | -0.639605 | H |
| 0.429504 | -0.24283  | -1.360317 | H |
| 0.60056  | -0.692081 | -0.634208 | H |
| 0.399424 | -0.308139 | -1.365919 | H |
| 0.537015 | -0.805352 | -1.491919 | H |
| 0.462979 | -0.19467  | -0.507974 | H |
| 0.562644 | -0.736018 | -1.483056 | H |
| 0.437378 | -0.263894 | -0.517066 | H |
| 0.608769 | -0.87146  | -1.534896 | H |
| 0.391228 | -0.128601 | -0.465006 | H |
| 0.635004 | -0.802176 | -1.526387 | H |
| 0.364994 | -0.197788 | -0.473671 | H |
| 0.455075 | -0.64508  | -0.630852 | H |
| 0.544907 | -0.354884 | -1.369134 | H |
| 0.483388 | -0.740643 | -0.604818 | H |
| 0.516554 | -0.25936  | -1.395201 | H |
| 0.4483   | -0.647769 | -0.496211 | H |
| 0.5518   | -0.352247 | -1.503776 | H |
| 0.47841  | -0.741276 | -1.464949 | H |
| 0.521573 | -0.258866 | -0.53505  | H |
| 0.391922 | -0.708505 | -0.512167 | H |
| 0.608061 | -0.291032 | -1.487928 | H |
| 0.421628 | -0.803152 | -0.481964 | H |
| 0.578161 | -0.196591 | -1.518108 | H |
| 0.704041 | -0.536978 | -0.876588 | H |
| 0.296024 | -0.462896 | -1.123504 | H |
| 0.720564 | -0.467903 | -0.851714 | H |
| 0.279479 | -0.531827 | -1.148552 | H |
| 0.658417 | -0.498883 | -0.727983 | H |
| 0.341694 | -0.501062 | -1.272053 | H |
| 0.641925 | -0.566175 | -0.754089 | H |
| 0.358403 | -0.434221 | -1.245651 | H |
| 0.712001 | -0.650949 | -0.737068 | H |
| 0.288643 | -0.348525 | -1.263174 | H |
| 0.72916  | -0.58199  | -1.712746 | H |

|          |           |           |   |
|----------|-----------|-----------|---|
| 0.27124  | -0.416972 | -0.287834 | H |
| 0.719912 | -0.352167 | -0.993685 | H |
| 0.280056 | -0.647779 | -1.006294 | H |
| 0.707799 | -0.423368 | -1.021784 | H |
| 0.292193 | -0.576599 | -0.978193 | H |
| 0.656191 | -0.260183 | -1.048064 | H |
| 0.343746 | -0.739836 | -0.951916 | H |
| 0.647631 | -0.332252 | -1.076932 | H |
| 0.352386 | -0.667767 | -0.92313  | H |
| 0.722193 | -0.3208   | -1.168051 | H |
| 0.277848 | -0.679082 | -0.831928 | H |
| 0.691258 | -0.226986 | -1.195423 | H |
| 0.308754 | -0.772932 | -0.804543 | H |
| 0.619846 | -0.299025 | -0.898169 | H |
| 0.380145 | -0.700947 | -1.101831 | H |
| 0.620637 | -0.374877 | -0.800848 | H |
| 0.379341 | -0.625082 | -1.199142 | H |
| 0.699312 | -0.354448 | -0.823599 | H |
| 0.30067  | -0.645549 | -1.176378 | H |
| 0.696994 | -0.276995 | -0.919857 | H |
| 0.303001 | -0.723005 | -1.080129 | H |
| 0.641192 | -0.278206 | -0.756549 | H |
| 0.358792 | -0.721767 | -1.243452 | H |
| 0.638307 | -0.201083 | -0.853411 | H |
| 0.361704 | -0.798879 | -1.146597 | H |
| 0.639169 | -0.441829 | -1.37635  | H |
| 0.360826 | -0.558168 | -0.623625 | H |
| 0.656283 | -0.345235 | -1.41678  | H |
| 0.343698 | -0.654748 | -0.583219 | H |
| 0.733027 | -0.398796 | -1.460887 | H |
| 0.266966 | -0.601192 | -0.539073 | H |
| 0.715172 | -0.495262 | -1.418795 | H |
| 0.284819 | -0.504717 | -0.581195 | H |
| 0.665838 | -0.447155 | -1.513591 | H |
| 0.334186 | -0.552809 | -0.486454 | H |
| 0.683702 | -0.349957 | -1.557353 | H |
| 0.316296 | -0.649995 | -0.442623 | H |
| 0.736054 | -0.518933 | -1.306106 | H |
| 0.26395  | -0.48102  | -0.693902 | H |
| 0.714255 | -0.534258 | -1.202644 | H |
| 0.285746 | -0.465705 | -0.797361 | H |
| 0.656162 | -0.60585  | -1.190158 | H |
| 0.343835 | -0.394099 | -0.80986  | H |



|          |           |           |   |
|----------|-----------|-----------|---|
| 0.666312 | -0.57703  | -1.295457 | H |
| 0.333687 | -0.422908 | -0.704566 | H |
| 0.69691  | -0.718573 | -1.225707 | H |
| 0.303084 | -0.281375 | -0.774318 | H |
| 0.730275 | -0.682945 | -1.190837 | H |
| 0.269719 | -0.317012 | -0.809186 | H |
| 0.726288 | -0.380605 | -1.256988 | H |
| 0.273697 | -0.619341 | -0.743008 | H |
| 0.744033 | -0.371909 | -1.358532 | H |
| 0.255967 | -0.628059 | -0.641452 | H |
| 0.686248 | -0.256246 | -1.397119 | H |
| 0.31376  | -0.743705 | -0.602914 | H |
| 0.672719 | -0.264435 | -1.296749 | H |
| 0.327279 | -0.735509 | -0.70328  | H |
| 0.761638 | -0.226389 | -1.416077 | H |
| 0.238372 | -0.773585 | -0.583915 | H |
| 0.748571 | -0.233755 | -1.31508  | H |
| 0.251427 | -0.766218 | -0.684912 | H |
| 0.603506 | -0.15888  | -1.146611 | H |
| 0.396494 | -0.84111  | -0.853375 | H |
| 0.636013 | -0.144364 | -1.244294 | H |
| 0.363991 | -0.85562  | -0.755689 | H |
| 0.580817 | -0.013576 | -1.193792 | H |
| 0.41918  | -0.986414 | -0.806193 | H |
| 0.612408 | -0.995115 | -1.292943 | H |
| 0.387588 | -0.004874 | -0.707044 | H |
| 0.573398 | -0.028588 | -1.365707 | H |
| 0.426618 | -0.971393 | -0.634262 | H |
| 0.537527 | -0.093562 | -1.357453 | H |
| 0.462486 | -0.906392 | -0.642554 | H |
| 0.598837 | -0.190876 | -1.376412 | H |
| 0.401173 | -0.809088 | -0.623582 | H |
| 0.635581 | -0.132112 | -1.378909 | H |
| 0.364433 | -0.867846 | -0.621103 | H |
| 0.635559 | -0.108957 | -1.520628 | H |
| 0.364428 | -0.891032 | -0.479369 | H |
| 0.5799   | -0.076579 | -1.503304 | H |
| 0.420092 | -0.923389 | -0.496672 | H |
| 0.442313 | -0.007685 | -1.258561 | H |
| 0.557639 | -0.992446 | -0.741252 | H |
| 0.437296 | -0.005984 | -1.163066 | H |
| 0.562708 | -0.994157 | -0.83676  | H |
| 0.487554 | -0.125949 | -1.204276 | H |

|          |           |           |   |
|----------|-----------|-----------|---|
| 0.512448 | -0.874125 | -0.795639 | H |
| 0.508458 | -0.122061 | -1.129992 | H |
| 0.491574 | -0.877957 | -0.869985 | H |
| 0.516359 | -0.97997  | -1.205715 | H |
| 0.483638 | -0.020041 | -0.794308 | H |
| 0.519606 | -0.982613 | -1.299164 | H |
| 0.480333 | -0.017423 | -0.700821 | H |
| 0.289093 | -0.300189 | -1.025397 | H |
| 0.710881 | -0.699753 | -0.974591 | H |
| 0.280214 | -0.207147 | -1.106864 | H |
| 0.719765 | -0.792793 | -0.893141 | H |
| 0.295528 | -0.328436 | -1.139163 | H |
| 0.704477 | -0.67149  | -0.860873 | H |
| 0.346519 | -0.34678  | -1.117974 | H |
| 0.653468 | -0.653177 | -0.881974 | H |
| 0.348611 | -0.277218 | -1.268724 | H |
| 0.651465 | -0.72273  | -0.731246 | H |
| 0.371201 | -0.221456 | -1.237092 | H |
| 0.628825 | -0.778488 | -0.762813 | H |
| 0.380015 | -0.098766 | -1.125945 | H |
| 0.619981 | -0.901214 | -0.874046 | H |
| 0.381966 | -0.136572 | -1.196631 | H |
| 0.618051 | -0.863418 | -0.803367 | H |
| 0.300435 | -0.050311 | -1.125575 | H |
| 0.699564 | -0.949686 | -0.874462 | H |
| 0.305213 | -0.082953 | -1.201766 | H |
| 0.694817 | -0.917008 | -0.798309 | H |
| 0.315223 | -0.936698 | -1.261891 | H |
| 0.684802 | -0.063269 | -0.738116 | H |
| 0.359397 | -0.957488 | -1.216896 | H |
| 0.6406   | -0.042495 | -0.783041 | H |
| 0.281429 | -0.150343 | -1.004672 | H |
| 0.718583 | -0.849573 | -0.995312 | H |
| 0.297138 | -0.243543 | -0.932028 | H |
| 0.702861 | -0.756394 | -1.06798  | H |
| 0.349879 | -0.097684 | -1.006337 | H |
| 0.650165 | -0.902319 | -0.993616 | H |
| 0.356946 | -0.189059 | -0.923834 | H |
| 0.643059 | -0.810964 | -1.076106 | H |
| 0.282929 | -0.158227 | -0.843522 | H |
| 0.71708  | -0.841734 | -1.156467 | H |
| 0.277218 | -0.067514 | -0.928689 | H |
| 0.722809 | -0.932453 | -1.071316 | H |

|          |           |           |   |
|----------|-----------|-----------|---|
| 0.468934 | -0.974529 | -1.085682 | H |
| 0.531063 | -0.025412 | -0.914311 | H |
| 0.453625 | -0.973594 | -0.987964 | H |
| 0.546391 | -0.026393 | -1.012007 | H |
| 0.391579 | -0.115949 | -0.904372 | H |
| 0.608425 | -0.884026 | -1.095592 | H |
| 0.42892  | -0.095895 | -0.865083 | H |
| 0.571108 | -0.904119 | -1.134916 | H |
| 0.488489 | -0.109351 | -0.984323 | H |
| 0.511505 | -0.890623 | -1.015719 | H |
| 0.44792  | -0.11697  | -1.023981 | H |
| 0.552054 | -0.882963 | -0.976045 | H |
| 0.364924 | -0.255699 | -0.778503 | H |
| 0.635075 | -0.744293 | -1.221516 | H |
| 0.399981 | -0.327291 | -0.721185 | H |
| 0.600022 | -0.672657 | -1.27881  | H |
| 0.380649 | -0.153092 | -0.737222 | H |
| 0.61934  | -0.84682  | -1.262892 | H |
| 0.413912 | -0.227392 | -0.677612 | H |
| 0.586086 | -0.772471 | -1.322482 | H |
| 0.340589 | -0.214873 | -0.591697 | H |
| 0.659392 | -0.784973 | -1.40842  | H |
| 0.31723  | -0.235616 | -0.653936 | H |
| 0.682775 | -0.76433  | -1.346148 | H |
| 0.509002 | -0.202596 | -0.866115 | H |
| 0.491006 | -0.797439 | -1.133861 | H |
| 0.474514 | -0.195465 | -0.776374 | H |
| 0.525487 | -0.804591 | -1.2236   | H |
| 0.477443 | -0.351206 | -0.71196  | H |
| 0.522533 | -0.648828 | -1.288044 | H |
| 0.516191 | -0.347893 | -0.800372 | H |
| 0.483778 | -0.652158 | -1.199631 | H |
| 0.562776 | -0.271762 | -0.775149 | H |
| 0.437223 | -0.728333 | -1.224846 | H |
| 0.552929 | -0.367123 | -0.693471 | H |
| 0.447053 | -0.632986 | -1.306558 | H |
| 0.652128 | -0.968223 | -1.212403 | H |
| 0.646102 | -0.067739 | -1.136997 | H |
| 0.347869 | -0.031763 | -0.787584 | H |
| 0.353895 | -0.93225  | -0.862989 | H |
| 0.363247 | -0.989763 | -1.294012 | H |
| 0.317394 | -0.081361 | -0.876301 | H |
| 0.448535 | -0.917723 | -1.253422 | H |

|          |           |           |   |
|----------|-----------|-----------|---|
| 0.414237 | -0.980146 | -1.031555 | H |
| 0.524342 | -0.279656 | -0.683624 | H |
| 0.350866 | -0.310704 | -0.594584 | H |
| 0.597755 | -0.465735 | -1.578111 | H |
| 0.602689 | -0.871144 | -1.43813  | H |
| 0.399651 | -0.758616 | -0.411564 | H |
| 0.382139 | -0.980131 | -0.494938 | H |
| 0.551402 | -0.082392 | -0.746407 | H |
| 0.320957 | -0.949818 | -0.764254 | H |
| 0.31422  | -0.779891 | -1.182316 | H |
| 0.268776 | -0.753082 | -0.859132 | H |
| 0.316038 | -0.361487 | -0.353556 | H |
| 0.397333 | -0.128776 | -0.56184  | H |
| 0.402592 | -0.534871 | -0.421965 | H |
| 0.60027  | -0.241062 | -1.588516 | H |
| 0.72032  | -0.430634 | -1.568296 | H |
| 0.649142 | -0.68918  | -1.405455 | H |
| 0.738094 | -0.655781 | -1.29633  | H |
| 0.722941 | -0.156101 | -1.388769 | H |
| 0.679039 | -0.05017  | -1.235732 | H |
| 0.617869 | -0.019842 | -1.505077 | H |
| 0.685782 | -0.220122 | -0.817657 | H |
| 0.731193 | -0.246819 | -1.140745 | H |
| 0.684639 | -0.638081 | -1.646618 | H |
| 0.585763 | -0.019784 | -0.968413 | H |
| 0.475661 | -0.720469 | -1.316346 | H |
| 0.68262  | -0.918614 | -1.123678 | H |
| 0.636795 | -0.010182 | -0.705975 | H |
| 0.681738 | -0.807158 | -0.745697 | H |
| 0.279705 | -0.569273 | -0.431724 | H |
| 0.261903 | -0.34417  | -0.703692 | H |
| 0.277072 | -0.843857 | -0.61124  | H |
| 0.318309 | -0.192793 | -1.254312 | H |

### POSCAR file of the Au<sub>32</sub>(Et<sub>3</sub>P)<sub>12</sub>Cl<sub>8</sub> assembly system

```

1
6.599518 7.269905 31.147601
18.833293 0 0
8.445458 17.108358 0
Au Cl P C H
64 16 24 144 360
direct

```

|          |          |          |    |
|----------|----------|----------|----|
| 0.992997 | 0.054027 | 0.850593 | Au |
| 0.935597 | 0.123488 | 0.948525 | Au |
| 0.960648 | 0.254343 | 0.946597 | Au |
| 0.977326 | 0.218096 | 0.791442 | Au |
| 0.89509  | 0.160882 | 0.074517 | Au |
| 0.906553 | 0.080707 | 0.850063 | Au |
| 0.860443 | 0.04608  | 0.037282 | Au |
| 0.93279  | 0.959821 | 0.980119 | Au |
| 0.949817 | 0.797565 | 0.007671 | Au |
| 0.957291 | 0.939251 | 0.840704 | Au |
| 0.067216 | 0.040147 | 0.019905 | Au |
| 0.050182 | 0.202439 | 0.99233  | Au |
| 0.042708 | 0.06075  | 0.159295 | Au |
| 0.974307 | 0.85186  | 0.098472 | Au |
| 0.937044 | 0.860558 | 0.244178 | Au |
| 0.883014 | 0.879837 | 0.130507 | Au |
| 0.925231 | 0.999499 | 0.1121   | Au |
| 0.025678 | 0.148051 | 0.90162  | Au |
| 0.062932 | 0.139586 | 0.755993 | Au |
| 0.116983 | 0.120141 | 0.869491 | Au |
| 0.074754 | 0.000502 | 0.887867 | Au |
| 0.017974 | 0.888455 | 0.93636  | Au |
| 0.054282 | 0.970232 | 0.775395 | Au |
| 0.982029 | 0.111541 | 0.063701 | Au |
| 0.945381 | 0.029642 | 0.22453  | Au |
| 0.007    | 0.945966 | 0.149425 | Au |
| 0.064367 | 0.876392 | 0.051771 | Au |
| 0.03936  | 0.745684 | 0.053391 | Au |
| 0.022132 | 0.781732 | 0.209544 | Au |
| 0.104885 | 0.839199 | 0.925546 | Au |
| 0.093449 | 0.919298 | 0.149961 | Au |
| 0.139543 | 0.953912 | 0.962719 | Au |
| 0.572233 | 0.582897 | 0.946522 | Au |
| 0.427837 | 0.417175 | 0.053556 | Au |
| 0.489141 | 0.659286 | 0.951299 | Au |
| 0.51095  | 0.340638 | 0.048748 | Au |
| 0.427064 | 0.55204  | 0.08469  | Au |
| 0.572935 | 0.447976 | 0.915325 | Au |
| 0.475438 | 0.408719 | 0.165594 | Au |
| 0.524509 | 0.591395 | 0.834394 | Au |
| 0.562285 | 0.427183 | 0.074695 | Au |
| 0.437724 | 0.572837 | 0.925303 | Au |
| 0.511926 | 0.55702  | 0.096628 | Au |

|          |          |          |    |
|----------|----------|----------|----|
| 0.488114 | 0.443008 | 0.903389 | Au |
| 0.640049 | 0.466079 | 0.962235 | Au |
| 0.359959 | 0.533924 | 0.037777 | Au |
| 0.612075 | 0.58596  | 0.797233 | Au |
| 0.387894 | 0.414038 | 0.202775 | Au |
| 0.558199 | 0.721049 | 0.816083 | Au |
| 0.441815 | 0.27893  | 0.183913 | Au |
| 0.462819 | 0.723021 | 0.813606 | Au |
| 0.53688  | 0.277442 | 0.186866 | Au |
| 0.401372 | 0.695334 | 0.96847  | Au |
| 0.598638 | 0.304641 | 0.031582 | Au |
| 0.450339 | 0.682308 | 0.091543 | Au |
| 0.549669 | 0.317691 | 0.908453 | Au |
| 0.545515 | 0.702827 | 0.00177  | Au |
| 0.454572 | 0.29719  | 0.998406 | Au |
| 0.441418 | 0.525067 | 0.22654  | Au |
| 0.558584 | 0.474943 | 0.773473 | Au |
| 0.599009 | 0.536124 | 0.089248 | Au |
| 0.401028 | 0.463892 | 0.910793 | Au |
| 0.540146 | 0.429632 | 0.22346  | Au |
| 0.459903 | 0.570302 | 0.776568 | Au |
| 0.788344 | 0.085751 | 0.032583 | Cl |
| 0.959301 | 0.33232  | 0.6828   | Cl |
| 0.921108 | 0.688873 | 0.013503 | Cl |
| 0.078929 | 0.311091 | 0.986503 | Cl |
| 0.079353 | 0.950433 | 0.65609  | Cl |
| 0.920651 | 0.049595 | 0.343842 | Cl |
| 0.211631 | 0.914152 | 0.967434 | Cl |
| 0.040642 | 0.66752  | 0.31766  | Cl |
| 0.420532 | 0.520493 | 0.357161 | Cl |
| 0.579473 | 0.479509 | 0.642842 | Cl |
| 0.715389 | 0.457535 | 0.942715 | Cl |
| 0.284629 | 0.542396 | 0.057263 | Cl |
| 0.570746 | 0.80963  | 0.005958 | Cl |
| 0.42934  | 0.190434 | 0.994117 | Cl |
| 0.450824 | 0.834453 | 0.697881 | Cl |
| 0.549135 | 0.165642 | 0.302112 | Cl |
| 0.836929 | 0.196911 | 0.155174 | P  |
| 0.972879 | 0.383577 | 0.868353 | P  |
| 0.855178 | 0.164358 | 0.785852 | P  |
| 0.958017 | 0.864585 | 0.774025 | P  |
| 0.041984 | 0.135431 | 0.225959 | P  |
| 0.909896 | 0.797293 | 0.377018 | P  |

|          |          |          |   |
|----------|----------|----------|---|
| 0.089969 | 0.202848 | 0.623022 | P |
| 0.163025 | 0.803149 | 0.844806 | P |
| 0.027163 | 0.616468 | 0.131611 | P |
| 0.144826 | 0.835611 | 0.214134 | P |
| 0.833348 | 0.798584 | 0.154014 | P |
| 0.166659 | 0.201409 | 0.845982 | P |
| 0.528371 | 0.36127  | 0.359711 | P |
| 0.471649 | 0.638719 | 0.640324 | P |
| 0.656631 | 0.584431 | 0.091155 | P |
| 0.343425 | 0.415568 | 0.908851 | P |
| 0.675017 | 0.570297 | 0.713409 | P |
| 0.324957 | 0.42965  | 0.286569 | P |
| 0.560143 | 0.854936 | 0.765792 | P |
| 0.439883 | 0.145046 | 0.234215 | P |
| 0.342912 | 0.780996 | 0.940393 | P |
| 0.657076 | 0.218935 | 0.059676 | P |
| 0.438395 | 0.766435 | 0.152483 | P |
| 0.561611 | 0.233573 | 0.847495 | P |
| 0.797916 | 0.122577 | 0.210645 | C |
| 0.816479 | 0.042892 | 0.265079 | C |
| 0.85057  | 0.21804  | 0.230053 | C |
| 0.812923 | 0.244071 | 0.284912 | C |
| 0.805517 | 0.285459 | 0.099237 | C |
| 0.83128  | 0.357567 | 0.049222 | C |
| 0.978592 | 0.437851 | 0.923417 | C |
| 0.93936  | 0.437356 | 0.990219 | C |
| 0.930078 | 0.437442 | 0.81546  | C |
| 0.932859 | 0.526085 | 0.764119 | C |
| 0.024065 | 0.38827  | 0.79556  | C |
| 0.041616 | 0.469218 | 0.740867 | C |
| 0.814026 | 0.112462 | 0.784261 | C |
| 0.83275  | 0.054629 | 0.744901 | C |
| 0.823728 | 0.233176 | 0.828819 | C |
| 0.850464 | 0.28259  | 0.840768 | C |
| 0.879127 | 0.224248 | 0.680992 | C |
| 0.848045 | 0.279756 | 0.629968 | C |
| 0.999762 | 0.781738 | 0.795886 | C |
| 0.016664 | 0.744325 | 0.73557  | C |
| 0.968597 | 0.916886 | 0.664906 | C |
| 0.93644  | 0.988158 | 0.636448 | C |
| 0.906527 | 0.822163 | 0.8071   | C |
| 0.901613 | 0.767778 | 0.77078  | C |
| 0.000251 | 0.218302 | 0.204087 | C |

|          |          |          |   |
|----------|----------|----------|---|
| 0.983343 | 0.255698 | 0.264419 | C |
| 0.031412 | 0.083123 | 0.335072 | C |
| 0.063572 | 0.011844 | 0.363499 | C |
| 0.093479 | 0.177836 | 0.192896 | C |
| 0.098389 | 0.232222 | 0.229221 | C |
| 0.871244 | 0.861394 | 0.419215 | C |
| 0.863727 | 0.838501 | 0.50886  | C |
| 0.884309 | 0.708797 | 0.400873 | C |
| 0.867755 | 0.655962 | 0.488962 | C |
| 0.952616 | 0.761449 | 0.431508 | C |
| 0.980164 | 0.82725  | 0.411211 | C |
| 0.12865  | 0.138735 | 0.580848 | C |
| 0.136216 | 0.161532 | 0.49121  | C |
| 0.115601 | 0.291345 | 0.599037 | C |
| 0.132216 | 0.344068 | 0.510935 | C |
| 0.047261 | 0.238644 | 0.568529 | C |
| 0.01976  | 0.172767 | 0.588859 | C |
| 0.202057 | 0.87744  | 0.789309 | C |
| 0.183504 | 0.957129 | 0.734884 | C |
| 0.149405 | 0.781978 | 0.769927 | C |
| 0.187068 | 0.755928 | 0.715098 | C |
| 0.194448 | 0.714602 | 0.900701 | C |
| 0.168692 | 0.642486 | 0.950717 | C |
| 0.021433 | 0.562162 | 0.076597 | C |
| 0.06067  | 0.562595 | 0.00982  | C |
| 0.069951 | 0.562612 | 0.184527 | C |
| 0.067147 | 0.473978 | 0.23588  | C |
| 0.975993 | 0.611872 | 0.204384 | C |
| 0.95838  | 0.53096  | 0.259027 | C |
| 0.185984 | 0.887534 | 0.21567  | C |
| 0.167275 | 0.945376 | 0.255022 | C |
| 0.176265 | 0.766801 | 0.171141 | C |
| 0.149509 | 0.717384 | 0.159229 | C |
| 0.120903 | 0.775731 | 0.318999 | C |
| 0.152011 | 0.720252 | 0.369992 | C |
| 0.848741 | 0.69238  | 0.204013 | C |
| 0.817053 | 0.636487 | 0.216292 | C |
| 0.781288 | 0.818188 | 0.21456  | C |
| 0.783347 | 0.803768 | 0.298494 | C |
| 0.82106  | 0.809286 | 0.062141 | C |
| 0.812806 | 0.895035 | 0.00442  | C |
| 0.151268 | 0.307616 | 0.79599  | C |
| 0.182958 | 0.36351  | 0.783699 | C |



|          |          |          |   |
|----------|----------|----------|---|
| 0.218722 | 0.181826 | 0.785418 | C |
| 0.216662 | 0.196267 | 0.701482 | C |
| 0.178957 | 0.190689 | 0.937851 | C |
| 0.187208 | 0.104931 | 0.995562 | C |
| 0.522845 | 0.421491 | 0.415487 | C |
| 0.477189 | 0.578522 | 0.584511 | C |
| 0.562893 | 0.463613 | 0.392855 | C |
| 0.43715  | 0.536397 | 0.607134 | C |
| 0.571769 | 0.28405  | 0.389198 | C |
| 0.428249 | 0.715934 | 0.610836 | C |
| 0.568382 | 0.234567 | 0.478639 | C |
| 0.431628 | 0.76538  | 0.52139  | C |
| 0.478392 | 0.312999 | 0.396208 | C |
| 0.521631 | 0.686983 | 0.603813 | C |
| 0.456009 | 0.288698 | 0.484408 | C |
| 0.544006 | 0.711231 | 0.515611 | C |
| 0.692692 | 0.507778 | 0.14904  | C |
| 0.307356 | 0.492211 | 0.850977 | C |
| 0.671082 | 0.462893 | 0.236601 | C |
| 0.328942 | 0.537049 | 0.763399 | C |
| 0.692537 | 0.631352 | 0.993483 | C |
| 0.307518 | 0.36864  | 0.006508 | C |
| 0.670108 | 0.694809 | 0.929922 | C |
| 0.329948 | 0.305178 | 0.070053 | C |
| 0.640051 | 0.657008 | 0.135585 | C |
| 0.359998 | 0.343004 | 0.864412 | C |
| 0.675944 | 0.691314 | 0.143622 | C |
| 0.324107 | 0.308679 | 0.856385 | C |
| 0.667538 | 0.592342 | 0.614138 | C |
| 0.332445 | 0.407603 | 0.385834 | C |
| 0.70667  | 0.57394  | 0.556319 | C |
| 0.29331  | 0.426007 | 0.443648 | C |
| 0.703587 | 0.47164  | 0.747032 | C |
| 0.296409 | 0.52833  | 0.252934 | C |
| 0.677748 | 0.405727 | 0.761569 | C |
| 0.322266 | 0.594241 | 0.238329 | C |
| 0.715184 | 0.634609 | 0.696697 | C |
| 0.284807 | 0.365322 | 0.303264 | C |
| 0.698727 | 0.722018 | 0.667898 | C |
| 0.301267 | 0.277906 | 0.332115 | C |
| 0.604892 | 0.879171 | 0.788444 | C |
| 0.395127 | 0.120814 | 0.211568 | C |
| 0.611228 | 0.966327 | 0.760049 | C |

|          |          |          |   |
|----------|----------|----------|---|
| 0.388804 | 0.033649 | 0.239962 | C |
| 0.565586 | 0.904703 | 0.657298 | C |
| 0.43444  | 0.095276 | 0.342706 | C |
| 0.602628 | 0.866882 | 0.611795 | C |
| 0.397383 | 0.133086 | 0.388205 | C |
| 0.50971  | 0.899152 | 0.808317 | C |
| 0.490315 | 0.100822 | 0.191673 | C |
| 0.501102 | 0.98934  | 0.774556 | C |
| 0.498925 | 0.01063  | 0.225434 | C |
| 0.307025 | 0.743713 | 0.909296 | C |
| 0.692971 | 0.256204 | 0.090774 | C |
| 0.329572 | 0.710742 | 0.846751 | C |
| 0.670431 | 0.289166 | 0.15332  | C |
| 0.358919 | 0.875847 | 0.8584   | C |
| 0.641068 | 0.124075 | 0.141649 | C |
| 0.322653 | 0.939046 | 0.83245  | C |
| 0.677341 | 0.060888 | 0.167565 | C |
| 0.307757 | 0.803886 | 0.022538 | C |
| 0.692216 | 0.196109 | 0.977467 | C |
| 0.330728 | 0.840444 | 0.055721 | C |
| 0.669221 | 0.159581 | 0.944286 | C |
| 0.426486 | 0.872746 | 0.094935 | C |
| 0.573514 | 0.127256 | 0.905024 | C |
| 0.453435 | 0.903756 | 0.009361 | C |
| 0.546588 | 0.096246 | 0.990611 | C |
| 0.394194 | 0.738209 | 0.241466 | C |
| 0.605817 | 0.261779 | 0.758517 | C |
| 0.385357 | 0.78712  | 0.290695 | C |
| 0.614645 | 0.212866 | 0.709291 | C |
| 0.485539 | 0.76321  | 0.187123 | C |
| 0.51446  | 0.236845 | 0.812857 | C |
| 0.503578 | 0.679574 | 0.234158 | C |
| 0.496457 | 0.320519 | 0.765802 | C |
| 0.770075 | 0.14761  | 0.244557 | H |
| 0.786938 | 0.116118 | 0.164138 | H |
| 0.84281  | 0.017008 | 0.229575 | H |
| 0.829714 | 0.048008 | 0.309562 | H |
| 0.869074 | 0.163773 | 0.264587 | H |
| 0.873863 | 0.263573 | 0.195957 | H |
| 0.789591 | 0.198816 | 0.31904  | H |
| 0.795607 | 0.300204 | 0.251286 | H |
| 0.793605 | 0.268673 | 0.060499 | H |
| 0.776987 | 0.297601 | 0.141928 | H |

|          |          |          |   |
|----------|----------|----------|---|
| 0.842044 | 0.377178 | 0.087074 | H |
| 0.860267 | 0.343458 | 0.008743 | H |
| 0.007513 | 0.408086 | 0.947563 | H |
| 0.985749 | 0.499304 | 0.880684 | H |
| 0.932764 | 0.375809 | 0.032957 | H |
| 0.910362 | 0.466607 | 0.966763 | H |
| 0.929896 | 0.405195 | 0.779091 | H |
| 0.900014 | 0.425798 | 0.862514 | H |
| 0.960881 | 0.537745 | 0.713052 | H |
| 0.934928 | 0.558492 | 0.798864 | H |
| 0.046046 | 0.348364 | 0.834386 | H |
| 0.020357 | 0.356609 | 0.761129 | H |
| 0.076659 | 0.464535 | 0.73366  | H |
| 0.027901 | 0.514774 | 0.764635 | H |
| 0.797742 | 0.081296 | 0.847816 | H |
| 0.790036 | 0.157301 | 0.753948 | H |
| 0.857732 | 0.012315 | 0.774215 | H |
| 0.847869 | 0.08565  | 0.680783 | H |
| 0.801481 | 0.271045 | 0.789739 | H |
| 0.804124 | 0.195294 | 0.887165 | H |
| 0.872663 | 0.316921 | 0.784648 | H |
| 0.870222 | 0.244079 | 0.884426 | H |
| 0.903075 | 0.257399 | 0.682517 | H |
| 0.898039 | 0.181621 | 0.65603  | H |
| 0.829682 | 0.323311 | 0.653889 | H |
| 0.82487  | 0.247365 | 0.625738 | H |
| 0.026108 | 0.806297 | 0.801402 | H |
| 0.986171 | 0.738466 | 0.85695  | H |
| 0.033297 | 0.78715  | 0.677363 | H |
| 0.991157 | 0.722332 | 0.725137 | H |
| 0.0016   | 0.935111 | 0.646576 | H |
| 0.969173 | 0.87402  | 0.639504 | H |
| 0.936008 | 0.030159 | 0.662677 | H |
| 0.90354  | 0.970387 | 0.653947 | H |
| 0.902004 | 0.790329 | 0.873097 | H |
| 0.882055 | 0.873452 | 0.796153 | H |
| 0.923331 | 0.713039 | 0.78807  | H |
| 0.908136 | 0.796768 | 0.704658 | H |
| 0.973904 | 0.193764 | 0.198551 | H |
| 0.01385  | 0.26158  | 0.143033 | H |
| 0.966709 | 0.212861 | 0.32262  | H |
| 0.008843 | 0.277695 | 0.274864 | H |
| 0.998409 | 0.064898 | 0.353415 | H |

|          |          |          |   |
|----------|----------|----------|---|
| 0.030848 | 0.125974 | 0.360485 | H |
| 0.063994 | 0.96986  | 0.337257 | H |
| 0.096474 | 0.029603 | 0.346    | H |
| 0.098008 | 0.209678 | 0.126896 | H |
| 0.11795  | 0.126545 | 0.203852 | H |
| 0.076668 | 0.28696  | 0.211935 | H |
| 0.091865 | 0.20323  | 0.295342 | H |
| 0.841201 | 0.866101 | 0.401146 | H |
| 0.883453 | 0.921024 | 0.385222 | H |
| 0.851201 | 0.77986  | 0.546267 | H |
| 0.893636 | 0.837816 | 0.525019 | H |
| 0.908871 | 0.675445 | 0.370578 | H |
| 0.85838  | 0.73075  | 0.367845 | H |
| 0.893342 | 0.634533 | 0.522438 | H |
| 0.841543 | 0.687167 | 0.51878  | H |
| 0.972422 | 0.714491 | 0.41353  | H |
| 0.938056 | 0.733573 | 0.496473 | H |
| 0.996922 | 0.849582 | 0.347198 | H |
| 0.961162 | 0.878671 | 0.421617 | H |
| 0.158672 | 0.134065 | 0.598966 | H |
| 0.116451 | 0.079096 | 0.614871 | H |
| 0.148747 | 0.220165 | 0.453767 | H |
| 0.106318 | 0.162185 | 0.475033 | H |
| 0.091076 | 0.324793 | 0.629271 | H |
| 0.141521 | 0.26934  | 0.632097 | H |
| 0.106656 | 0.365514 | 0.477394 | H |
| 0.158423 | 0.312762 | 0.481221 | H |
| 0.027426 | 0.285587 | 0.586497 | H |
| 0.061812 | 0.266517 | 0.503556 | H |
| 0.003007 | 0.150438 | 0.652874 | H |
| 0.038785 | 0.121359 | 0.578461 | H |
| 0.229878 | 0.852381 | 0.755382 | H |
| 0.213066 | 0.883884 | 0.83579  | H |
| 0.157184 | 0.983037 | 0.770378 | H |
| 0.170259 | 0.95201  | 0.690414 | H |
| 0.13091  | 0.836234 | 0.735354 | H |
| 0.126117 | 0.736438 | 0.804009 | H |
| 0.210403 | 0.801179 | 0.680962 | H |
| 0.204385 | 0.699802 | 0.748739 | H |
| 0.206374 | 0.731367 | 0.939439 | H |
| 0.22297  | 0.702476 | 0.85799  | H |
| 0.157934 | 0.622868 | 0.912866 | H |
| 0.139704 | 0.656588 | 0.991199 | H |

|          |          |          |   |
|----------|----------|----------|---|
| 0.992521 | 0.591923 | 0.052423 | H |
| 0.014275 | 0.500718 | 0.119356 | H |
| 0.067277 | 0.624124 | 0.967028 | H |
| 0.089672 | 0.533362 | 0.03327  | H |
| 0.070131 | 0.594867 | 0.220885 | H |
| 0.100023 | 0.574227 | 0.137488 | H |
| 0.039105 | 0.462347 | 0.286914 | H |
| 0.065085 | 0.441574 | 0.201124 | H |
| 0.954023 | 0.651896 | 0.165588 | H |
| 0.979766 | 0.643439 | 0.238855 | H |
| 0.923363 | 0.535678 | 0.265921 | H |
| 0.972182 | 0.48532  | 0.235404 | H |
| 0.202253 | 0.918691 | 0.152107 | H |
| 0.209984 | 0.842703 | 0.24596  | H |
| 0.142291 | 0.987687 | 0.225716 | H |
| 0.152162 | 0.914362 | 0.319142 | H |
| 0.198519 | 0.728931 | 0.210199 | H |
| 0.195852 | 0.804681 | 0.112777 | H |
| 0.127315 | 0.683068 | 0.215368 | H |
| 0.129742 | 0.755881 | 0.115583 | H |
| 0.096951 | 0.742551 | 0.317524 | H |
| 0.101997 | 0.818356 | 0.343968 | H |
| 0.17037  | 0.676694 | 0.346068 | H |
| 0.175189 | 0.752666 | 0.374179 | H |
| 0.879892 | 0.682463 | 0.165342 | H |
| 0.85541  | 0.68291  | 0.26123  | H |
| 0.813993 | 0.641133 | 0.15838  | H |
| 0.78479  | 0.648353 | 0.250193 | H |
| 0.770896 | 0.881052 | 0.180783 | H |
| 0.75807  | 0.781682 | 0.216373 | H |
| 0.791805 | 0.74048  | 0.334203 | H |
| 0.807706 | 0.83869  | 0.295453 | H |
| 0.849043 | 0.778617 | 0.034343 | H |
| 0.793135 | 0.775028 | 0.080426 | H |
| 0.841793 | 0.927336 | 0.982611 | H |
| 0.78686  | 0.928579 | 0.032088 | H |
| 0.12012  | 0.317535 | 0.834665 | H |
| 0.144595 | 0.317087 | 0.738776 | H |
| 0.186029 | 0.358859 | 0.841605 | H |
| 0.215217 | 0.351649 | 0.749782 | H |
| 0.229118 | 0.11896  | 0.81918  | H |
| 0.241936 | 0.218331 | 0.783615 | H |
| 0.208187 | 0.259551 | 0.66579  | H |

|          |          |          |   |
|----------|----------|----------|---|
| 0.192312 | 0.161329 | 0.704515 | H |
| 0.150974 | 0.221353 | 0.965659 | H |
| 0.206882 | 0.224948 | 0.919573 | H |
| 0.15822  | 0.072637 | 0.017367 | H |
| 0.213154 | 0.071397 | 0.96788  | H |
| 0.175738 | 0.746497 | 0.671003 | H |
| 0.208464 | 0.999416 | 0.702095 | H |
| 0.188161 | 0.5923   | 0.98732  | H |
| 0.055686 | 0.530711 | 0.976886 | H |
| 0.09604  | 0.448151 | 0.260485 | H |
| 0.964583 | 0.5083   | 0.319335 | H |
| 0.855121 | 0.603113 | 0.494699 | H |
| 0.828196 | 0.574268 | 0.250076 | H |
| 0.804001 | 0.897038 | 0.951918 | H |
| 0.752183 | 0.821181 | 0.331339 | H |
| 0.840482 | 0.882937 | 0.525441 | H |
| 0.004662 | 0.804479 | 0.447247 | H |
| 0.134309 | 0.686325 | 0.431587 | H |
| 0.1923   | 0.979415 | 0.250895 | H |
| 0.170594 | 0.675431 | 0.13568  | H |
| 0.959799 | 0.306554 | 0.242538 | H |
| 0.131403 | 0.250359 | 0.207377 | H |
| 0.055408 | 0.980227 | 0.429404 | H |
| 0.944607 | 0.019758 | 0.570541 | H |
| 0.040203 | 0.693461 | 0.757457 | H |
| 0.868597 | 0.749647 | 0.792629 | H |
| 0.807734 | 0.020584 | 0.749007 | H |
| 0.865765 | 0.313683 | 0.568384 | H |
| 0.829366 | 0.324519 | 0.864338 | H |
| 0.903947 | 0.55189  | 0.739556 | H |
| 0.035243 | 0.491967 | 0.680676 | H |
| 0.944343 | 0.469205 | 0.023186 | H |
| 0.824269 | 0.253476 | 0.329006 | H |
| 0.791529 | 0.000582 | 0.297832 | H |
| 0.811813 | 0.407755 | 0.012619 | H |
| 0.159464 | 0.117046 | 0.474723 | H |
| 0.995249 | 0.19546  | 0.552851 | H |
| 0.144882 | 0.396901 | 0.505162 | H |
| 0.247827 | 0.178879 | 0.668619 | H |
| 0.196019 | 0.10292  | 0.048061 | H |
| 0.171813 | 0.425733 | 0.749921 | H |
| 0.494465 | 0.46417  | 0.401964 | H |
| 0.505573 | 0.535852 | 0.598038 | H |

|          |          |          |   |
|----------|----------|----------|---|
| 0.514963 | 0.382748 | 0.480338 | H |
| 0.485076 | 0.617278 | 0.519665 | H |
| 0.591105 | 0.421049 | 0.406904 | H |
| 0.408937 | 0.578953 | 0.59308  | H |
| 0.57061  | 0.501714 | 0.327946 | H |
| 0.429433 | 0.498295 | 0.672043 | H |
| 0.572935 | 0.246055 | 0.3578   | H |
| 0.427087 | 0.753956 | 0.642204 | H |
| 0.601578 | 0.314762 | 0.36076  | H |
| 0.398441 | 0.685222 | 0.639292 | H |
| 0.540893 | 0.198063 | 0.50563  | H |
| 0.459111 | 0.801901 | 0.494363 | H |
| 0.564937 | 0.271519 | 0.511877 | H |
| 0.43507  | 0.728406 | 0.488178 | H |
| 0.45696  | 0.356197 | 0.358018 | H |
| 0.543063 | 0.64379  | 0.642003 | H |
| 0.486613 | 0.262301 | 0.378583 | H |
| 0.513424 | 0.737706 | 0.621397 | H |
| 0.446098 | 0.340936 | 0.499121 | H |
| 0.553915 | 0.658966 | 0.500943 | H |
| 0.476095 | 0.246005 | 0.525277 | H |
| 0.523922 | 0.753899 | 0.474731 | H |
| 0.70423  | 0.467721 | 0.117712 | H |
| 0.295825 | 0.532291 | 0.882276 | H |
| 0.720884 | 0.535981 | 0.142916 | H |
| 0.279166 | 0.463971 | 0.857156 | H |
| 0.66076  | 0.502039 | 0.268844 | H |
| 0.339252 | 0.497859 | 0.731199 | H |
| 0.642242 | 0.437358 | 0.241453 | H |
| 0.357788 | 0.562612 | 0.758469 | H |
| 0.717972 | 0.655107 | 0.002668 | H |
| 0.282087 | 0.344889 | 0.997307 | H |
| 0.707808 | 0.581759 | 0.975779 | H |
| 0.292246 | 0.418223 | 0.024226 | H |
| 0.652399 | 0.742908 | 0.947744 | H |
| 0.347658 | 0.257079 | 0.052229 | H |
| 0.646491 | 0.668782 | 0.918676 | H |
| 0.353559 | 0.331185 | 0.081332 | H |
| 0.61924  | 0.704117 | 0.09846  | H |
| 0.380804 | 0.295887 | 0.90154  | H |
| 0.618455 | 0.626765 | 0.194452 | H |
| 0.381592 | 0.373234 | 0.805543 | H |
| 0.696359 | 0.644911 | 0.181645 | H |

|          |          |          |   |
|----------|----------|----------|---|
| 0.303686 | 0.355059 | 0.818357 | H |
| 0.696761 | 0.723564 | 0.084722 | H |
| 0.303293 | 0.276415 | 0.915281 | H |
| 0.640431 | 0.558965 | 0.62478  | H |
| 0.359547 | 0.440996 | 0.37518  | H |
| 0.655521 | 0.655762 | 0.589621 | H |
| 0.344469 | 0.344189 | 0.410347 | H |
| 0.734469 | 0.605171 | 0.545909 | H |
| 0.265514 | 0.394769 | 0.454057 | H |
| 0.716671 | 0.509732 | 0.578635 | H |
| 0.283309 | 0.49021  | 0.421341 | H |
| 0.734002 | 0.474114 | 0.701605 | H |
| 0.266001 | 0.525886 | 0.298372 | H |
| 0.712005 | 0.462479 | 0.802881 | H |
| 0.287973 | 0.537475 | 0.197106 | H |
| 0.648744 | 0.400933 | 0.810379 | H |
| 0.351259 | 0.599025 | 0.189497 | H |
| 0.666797 | 0.415912 | 0.708022 | H |
| 0.333235 | 0.584074 | 0.291854 | H |
| 0.723732 | 0.612695 | 0.75524  | H |
| 0.276278 | 0.387199 | 0.244711 | H |
| 0.744319 | 0.623981 | 0.654155 | H |
| 0.255661 | 0.375955 | 0.34578  | H |
| 0.690915 | 0.744851 | 0.608728 | H |
| 0.309065 | 0.255105 | 0.391294 | H |
| 0.669152 | 0.730903 | 0.710344 | H |
| 0.330853 | 0.269004 | 0.2897   | H |
| 0.599965 | 0.848133 | 0.854597 | H |
| 0.400057 | 0.151848 | 0.145415 | H |
| 0.633686 | 0.847794 | 0.763685 | H |
| 0.366333 | 0.152181 | 0.236337 | H |
| 0.584915 | 0.995288 | 0.792082 | H |
| 0.415117 | 0.004691 | 0.207928 | H |
| 0.613253 | 0.000421 | 0.695136 | H |
| 0.386774 | 0.999551 | 0.304876 | H |
| 0.568781 | 0.968573 | 0.636888 | H |
| 0.431255 | 0.031406 | 0.363114 | H |
| 0.534496 | 0.899897 | 0.648026 | H |
| 0.465523 | 0.1001   | 0.351991 | H |
| 0.599141 | 0.802961 | 0.633778 | H |
| 0.400865 | 0.197004 | 0.366237 | H |
| 0.633914 | 0.87204  | 0.619627 | H |
| 0.366105 | 0.127917 | 0.380355 | H |



|          |          |          |   |
|----------|----------|----------|---|
| 0.485265 | 0.872464 | 0.799715 | H |
| 0.514764 | 0.127503 | 0.200272 | H |
| 0.507681 | 0.872675 | 0.873653 | H |
| 0.492338 | 0.1273   | 0.12634  | H |
| 0.52039  | 0.017087 | 0.792771 | H |
| 0.479632 | 0.982889 | 0.207222 | H |
| 0.507491 | 0.016335 | 0.708484 | H |
| 0.492538 | 0.983633 | 0.291505 | H |
| 0.291066 | 0.695949 | 0.964722 | H |
| 0.708921 | 0.303971 | 0.035343 | H |
| 0.282031 | 0.79245  | 0.888856 | H |
| 0.717969 | 0.207468 | 0.111192 | H |
| 0.305834 | 0.691508 | 0.829101 | H |
| 0.694167 | 0.308409 | 0.170965 | H |
| 0.351738 | 0.658192 | 0.871641 | H |
| 0.648256 | 0.341711 | 0.128447 | H |
| 0.380986 | 0.896442 | 0.87851  | H |
| 0.619002 | 0.103485 | 0.121533 | H |
| 0.379507 | 0.861123 | 0.80839  | H |
| 0.620481 | 0.138789 | 0.191668 | H |
| 0.302412 | 0.954652 | 0.881768 | H |
| 0.697576 | 0.045307 | 0.118225 | H |
| 0.30121  | 0.919604 | 0.810311 | H |
| 0.698792 | 0.080331 | 0.189689 | H |
| 0.279501 | 0.842668 | 0.001546 | H |
| 0.720473 | 0.157301 | 0.998435 | H |
| 0.295937 | 0.746573 | 0.068774 | H |
| 0.704036 | 0.253427 | 0.93125  | H |
| 0.342183 | 0.898194 | 0.010185 | H |
| 0.65777  | 0.101823 | 0.989806 | H |
| 0.358929 | 0.800753 | 0.07545  | H |
| 0.641017 | 0.199283 | 0.924586 | H |
| 0.391906 | 0.882249 | 0.095632 | H |
| 0.608098 | 0.117738 | 0.904287 | H |
| 0.431465 | 0.904226 | 0.128504 | H |
| 0.56851  | 0.095791 | 0.871458 | H |
| 0.488151 | 0.890884 | 0.007584 | H |
| 0.511869 | 0.109111 | 0.992425 | H |
| 0.446275 | 0.875046 | 0.975346 | H |
| 0.553767 | 0.124937 | 0.024622 | H |
| 0.365818 | 0.74135  | 0.219371 | H |
| 0.634193 | 0.258619 | 0.780622 | H |
| 0.401564 | 0.674312 | 0.277867 | H |

|          |          |          |   |
|----------|----------|----------|---|
| 0.598457 | 0.32568  | 0.722113 | H |
| 0.377429 | 0.850717 | 0.255421 | H |
| 0.622568 | 0.149268 | 0.744571 | H |
| 0.413076 | 0.782137 | 0.315067 | H |
| 0.586925 | 0.217858 | 0.68492  | H |
| 0.509796 | 0.794058 | 0.132299 | H |
| 0.490191 | 0.20603  | 0.867674 | H |
| 0.476455 | 0.799522 | 0.222587 | H |
| 0.523528 | 0.200544 | 0.777383 | H |
| 0.47932  | 0.64408  | 0.285399 | H |
| 0.520733 | 0.355982 | 0.714576 | H |
| 0.516027 | 0.647132 | 0.19509  | H |
| 0.48402  | 0.352967 | 0.804865 | H |
| 0.722872 | 0.758671 | 0.662286 | H |
| 0.697141 | 0.347987 | 0.779277 | H |
| 0.699234 | 0.591968 | 0.497623 | H |
| 0.573396 | 0.739476 | 0.50254  | H |
| 0.402488 | 0.806442 | 0.511477 | H |
| 0.441701 | 0.49898  | 0.574054 | H |
| 0.642027 | 0.234171 | 0.657726 | H |
| 0.469646 | 0.318249 | 0.742761 | H |
| 0.5533   | 0.031397 | 0.021397 | H |
| 0.662391 | 0.733997 | 0.171229 | H |
| 0.693631 | 0.721355 | 0.872827 | H |
| 0.693058 | 0.414082 | 0.268139 | H |
| 0.558348 | 0.501022 | 0.425938 | H |
| 0.426625 | 0.260456 | 0.497445 | H |
| 0.597517 | 0.193496 | 0.488546 | H |
| 0.467039 | 0.005683 | 0.796715 | H |
| 0.641248 | 0.971556 | 0.772263 | H |
| 0.603617 | 0.895498 | 0.546981 | H |
| 0.530389 | 0.681894 | 0.257171 | H |
| 0.357977 | 0.765805 | 0.342262 | H |
| 0.446725 | 0.968597 | 0.978559 | H |
| 0.358786 | 0.028417 | 0.227742 | H |
| 0.396387 | 0.104459 | 0.453022 | H |
| 0.532986 | 0.994284 | 0.203266 | H |
| 0.306954 | 0.585823 | 0.731859 | H |
| 0.33767  | 0.265995 | 0.82878  | H |
| 0.306423 | 0.278615 | 0.127144 | H |
| 0.300746 | 0.407969 | 0.502348 | H |
| 0.302872 | 0.651982 | 0.220632 | H |
| 0.27713  | 0.241236 | 0.337729 | H |

|          |          |          |   |
|----------|----------|----------|---|
| 0.309173 | 0.85088  | 0.107266 | H |
| 0.335905 | 0.993638 | 0.783242 | H |
| 0.348454 | 0.754331 | 0.792112 | H |
| 0.664105 | 0.006282 | 0.216768 | H |
| 0.690762 | 0.149164 | 0.89272  | H |
| 0.651553 | 0.245572 | 0.207965 | H |

## POSCAR file of the $\text{Au}_{32}(\text{Me}_3\text{P})_{12}\text{Cl}_8$ assembly system

```

1
6.531034 7.085206 30.750431
18.48558 0 0
8.182881 16.776388 0
Au Cl P C H
64 16 24 72 216
direct
0.993639 0.054173 0.848145 Au
0.933765 0.125188 0.94799 Au
0.960483 0.257798 0.947232 Au
0.97705 0.221327 0.789738 Au
0.89262 0.165951 0.074143 Au
0.907717 0.082927 0.841098 Au
0.858158 0.046275 0.037773 Au
0.931569 0.959597 0.976963 Au
0.949352 0.795622 0.004624 Au
0.958726 0.937367 0.834534 Au
0.068425 0.04044 0.02297 Au
0.050617 0.204293 0.995407 Au
0.04127 0.06262 0.16543 Au
0.973834 0.850712 0.098515 Au
0.936391 0.857416 0.247573 Au
0.881469 0.87918 0.131836 Au
0.924066 0.000485 0.113078 Au
0.026146 0.149293 0.901487 Au
0.063607 0.142573 0.752418 Au
0.118419 0.121123 0.867805 Au
0.075884 0.999511 0.886934 Au
0.018643 0.88686 0.934339 Au
0.055666 0.970874 0.769824 Au
0.98123 0.113019 0.065709 Au
0.944331 0.0291 0.230183 Au
0.006359 0.945822 0.151845 Au
0.066219 0.874819 0.051979 Au

```

|          |          |          |    |
|----------|----------|----------|----|
| 0.039498 | 0.742194 | 0.052782 | Au |
| 0.02295  | 0.778677 | 0.210254 | Au |
| 0.107311 | 0.834121 | 0.925727 | Au |
| 0.09228  | 0.917078 | 0.158891 | Au |
| 0.141804 | 0.953773 | 0.96214  | Au |
| 0.573311 | 0.582587 | 0.947118 | Au |
| 0.426712 | 0.417425 | 0.052938 | Au |
| 0.489248 | 0.662347 | 0.949242 | Au |
| 0.510852 | 0.337772 | 0.050771 | Au |
| 0.425169 | 0.555213 | 0.083564 | Au |
| 0.574866 | 0.444837 | 0.916374 | Au |
| 0.474749 | 0.408399 | 0.168057 | Au |
| 0.525266 | 0.591779 | 0.831989 | Au |
| 0.5632   | 0.425305 | 0.07781  | Au |
| 0.436935 | 0.574883 | 0.921938 | Au |
| 0.511132 | 0.558342 | 0.09875  | Au |
| 0.488889 | 0.441691 | 0.901299 | Au |
| 0.642052 | 0.46403  | 0.964481 | Au |
| 0.358004 | 0.53598  | 0.035493 | Au |
| 0.613795 | 0.585098 | 0.795854 | Au |
| 0.386133 | 0.415402 | 0.204068 | Au |
| 0.55965  | 0.723492 | 0.815235 | Au |
| 0.440938 | 0.276838 | 0.18501  | Au |
| 0.463419 | 0.726601 | 0.807501 | Au |
| 0.537171 | 0.274264 | 0.192445 | Au |
| 0.401563 | 0.703117 | 0.96205  | Au |
| 0.598614 | 0.296975 | 0.037863 | Au |
| 0.449304 | 0.684638 | 0.092725 | Au |
| 0.550681 | 0.31537  | 0.907337 | Au |
| 0.547425 | 0.704851 | 0.001386 | Au |
| 0.45263  | 0.295189 | 0.99866  | Au |
| 0.438401 | 0.526706 | 0.229713 | Au |
| 0.561593 | 0.473319 | 0.770297 | Au |
| 0.598246 | 0.538178 | 0.094144 | Au |
| 0.401796 | 0.461904 | 0.905865 | Au |
| 0.538789 | 0.430307 | 0.22915  | Au |
| 0.461226 | 0.56968  | 0.770855 | Au |
| 0.785072 | 0.075685 | 0.029289 | Cl |
| 0.950159 | 0.332413 | 0.686361 | Cl |
| 0.916714 | 0.688832 | 0.011358 | Cl |
| 0.083235 | 0.311171 | 0.988601 | Cl |
| 0.082814 | 0.950108 | 0.648774 | Cl |
| 0.917046 | 0.048829 | 0.351738 | Cl |

|          |          |          |    |
|----------|----------|----------|----|
| 0.214939 | 0.924219 | 0.970333 | CI |
| 0.049846 | 0.667575 | 0.31361  | CI |
| 0.416065 | 0.523503 | 0.362049 | CI |
| 0.583864 | 0.476446 | 0.637976 | CI |
| 0.717826 | 0.455075 | 0.949511 | CI |
| 0.28224  | 0.544669 | 0.050685 | CI |
| 0.576671 | 0.810424 | 0.00368  | CI |
| 0.423342 | 0.189687 | 0.99633  | CI |
| 0.449228 | 0.837219 | 0.68999  | CI |
| 0.550897 | 0.162944 | 0.309913 | CI |
| 0.834426 | 0.200168 | 0.159164 | P  |
| 0.972083 | 0.38968  | 0.872027 | P  |
| 0.853391 | 0.166704 | 0.782175 | P  |
| 0.958761 | 0.864021 | 0.764548 | P  |
| 0.041193 | 0.135969 | 0.235427 | P  |
| 0.909056 | 0.794812 | 0.382907 | P  |
| 0.090888 | 0.204952 | 0.617034 | P  |
| 0.165556 | 0.799859 | 0.840767 | P  |
| 0.027904 | 0.610301 | 0.127963 | P  |
| 0.146607 | 0.833266 | 0.217794 | P  |
| 0.829513 | 0.799679 | 0.157518 | P  |
| 0.170418 | 0.200406 | 0.842322 | P  |
| 0.528696 | 0.363858 | 0.367712 | P  |
| 0.471314 | 0.636129 | 0.63233  | P  |
| 0.657198 | 0.588323 | 0.092284 | P  |
| 0.342885 | 0.411591 | 0.907767 | P  |
| 0.678168 | 0.568673 | 0.712928 | P  |
| 0.321763 | 0.431407 | 0.287092 | P  |
| 0.559856 | 0.859702 | 0.761219 | P  |
| 0.440373 | 0.14071  | 0.239055 | P  |
| 0.341994 | 0.791643 | 0.945256 | P  |
| 0.658081 | 0.208289 | 0.054742 | P  |
| 0.437808 | 0.773663 | 0.150198 | P  |
| 0.562163 | 0.226382 | 0.849825 | P  |
| 0.798099 | 0.120487 | 0.217816 | C  |
| 0.846246 | 0.223992 | 0.235288 | C  |
| 0.800343 | 0.287417 | 0.106018 | C  |
| 0.978847 | 0.442268 | 0.929687 | C  |
| 0.930548 | 0.450461 | 0.816733 | C  |
| 0.021781 | 0.402603 | 0.793093 | C  |
| 0.807587 | 0.115252 | 0.79552  | C  |
| 0.829538 | 0.242115 | 0.823    | C  |
| 0.870294 | 0.224253 | 0.672892 | C  |

|          |          |          |   |
|----------|----------|----------|---|
| 0.000318 | 0.779847 | 0.781604 | C |
| 0.969638 | 0.919341 | 0.654436 | C |
| 0.908633 | 0.817925 | 0.793052 | C |
| 0.999593 | 0.220076 | 0.218296 | C |
| 0.030294 | 0.08065  | 0.345546 | C |
| 0.091294 | 0.182157 | 0.206938 | C |
| 0.868584 | 0.854172 | 0.429895 | C |
| 0.883868 | 0.703144 | 0.413066 | C |
| 0.951471 | 0.761626 | 0.439591 | C |
| 0.131345 | 0.145486 | 0.570161 | C |
| 0.116017 | 0.296738 | 0.586717 | C |
| 0.048414 | 0.237743 | 0.560526 | C |
| 0.201892 | 0.879539 | 0.78205  | C |
| 0.153756 | 0.775917 | 0.764705 | C |
| 0.199648 | 0.712637 | 0.893961 | C |
| 0.021153 | 0.55775  | 0.070246 | C |
| 0.06944  | 0.549507 | 0.183256 | C |
| 0.978184 | 0.597339 | 0.206864 | C |
| 0.192425 | 0.884714 | 0.204392 | C |
| 0.17045  | 0.757869 | 0.17695  | C |
| 0.129747 | 0.775665 | 0.327078 | C |
| 0.8415   | 0.69103  | 0.205408 | C |
| 0.778409 | 0.821968 | 0.220345 | C |
| 0.815315 | 0.816296 | 0.064037 | C |
| 0.158496 | 0.309071 | 0.794482 | C |
| 0.221523 | 0.178069 | 0.779541 | C |
| 0.184555 | 0.183649 | 0.935906 | C |
| 0.521284 | 0.427847 | 0.422139 | C |
| 0.478564 | 0.572051 | 0.578055 | C |
| 0.571985 | 0.287119 | 0.402477 | C |
| 0.428105 | 0.713083 | 0.597562 | C |
| 0.48035  | 0.309723 | 0.41244  | C |
| 0.519772 | 0.689942 | 0.587674 | C |
| 0.697912 | 0.51128  | 0.138011 | C |
| 0.302157 | 0.488595 | 0.862046 | C |
| 0.68687  | 0.646652 | 0.990243 | C |
| 0.313256 | 0.353149 | 0.009797 | C |
| 0.645095 | 0.656275 | 0.143552 | C |
| 0.355014 | 0.34368  | 0.856447 | C |
| 0.674768 | 0.59506  | 0.608893 | C |
| 0.325097 | 0.404877 | 0.391193 | C |
| 0.703126 | 0.465701 | 0.746867 | C |
| 0.296821 | 0.534385 | 0.25319  | C |

|          |          |          |   |
|----------|----------|----------|---|
| 0.720349 | 0.626526 | 0.703121 | C |
| 0.279614 | 0.373619 | 0.296662 | C |
| 0.604431 | 0.896078 | 0.773739 | C |
| 0.39575  | 0.104854 | 0.226123 | C |
| 0.560515 | 0.909105 | 0.652868 | C |
| 0.439475 | 0.091168 | 0.347483 | C |
| 0.511607 | 0.907325 | 0.80763  | C |
| 0.488588 | 0.092915 | 0.192764 | C |
| 0.303641 | 0.762045 | 0.910887 | C |
| 0.696449 | 0.237805 | 0.089148 | C |
| 0.353471 | 0.892171 | 0.868037 | C |
| 0.646543 | 0.107787 | 0.131946 | C |
| 0.310057 | 0.806233 | 0.035911 | C |
| 0.689986 | 0.193722 | 0.964066 | C |
| 0.429057 | 0.879998 | 0.085236 | C |
| 0.570843 | 0.120037 | 0.914811 | C |
| 0.392006 | 0.753797 | 0.237713 | C |
| 0.607973 | 0.246185 | 0.762333 | C |
| 0.483727 | 0.768289 | 0.190492 | C |
| 0.516236 | 0.231861 | 0.809491 | C |
| 0.76903  | 0.140006 | 0.255814 | H |
| 0.788479 | 0.103819 | 0.175229 | H |
| 0.865103 | 0.171588 | 0.273627 | H |
| 0.866088 | 0.275831 | 0.204343 | H |
| 0.789517 | 0.276315 | 0.06118  | H |
| 0.771608 | 0.300253 | 0.149309 | H |
| 0.006892 | 0.411153 | 0.957831 | H |
| 0.984863 | 0.505804 | 0.889325 | H |
| 0.928638 | 0.424428 | 0.774723 | H |
| 0.898859 | 0.44881  | 0.859802 | H |
| 0.0491   | 0.370362 | 0.822803 | H |
| 0.019257 | 0.375602 | 0.752437 | H |
| 0.793653 | 0.085132 | 0.861654 | H |
| 0.782572 | 0.158682 | 0.765049 | H |
| 0.803661 | 0.281543 | 0.792184 | H |
| 0.815911 | 0.210888 | 0.889123 | H |
| 0.895939 | 0.261804 | 0.662237 | H |
| 0.88372  | 0.182955 | 0.642009 | H |
| 0.032218 | 0.804163 | 0.760918 | H |
| 0.994541 | 0.741394 | 0.847686 | H |
| 0.001948 | 0.942242 | 0.634432 | H |
| 0.969564 | 0.879758 | 0.624201 | H |
| 0.903094 | 0.777672 | 0.85885  | H |

|          |          |          |   |
|----------|----------|----------|---|
| 0.881278 | 0.864987 | 0.782545 | H |
| 0.967714 | 0.195691 | 0.238917 | H |
| 0.005383 | 0.258481 | 0.152203 | H |
| 0.998006 | 0.057672 | 0.365533 | H |
| 0.030319 | 0.120274 | 0.375766 | H |
| 0.096829 | 0.222388 | 0.141133 | H |
| 0.118659 | 0.135124 | 0.217471 | H |
| 0.8398   | 0.870838 | 0.403436 | H |
| 0.88217  | 0.910438 | 0.415972 | H |
| 0.907792 | 0.661022 | 0.391733 | H |
| 0.856133 | 0.718165 | 0.384132 | H |
| 0.977425 | 0.723898 | 0.415083 | H |
| 0.938252 | 0.727343 | 0.505343 | H |
| 0.16013  | 0.128842 | 0.596612 | H |
| 0.117731 | 0.089219 | 0.584186 | H |
| 0.092082 | 0.338836 | 0.608062 | H |
| 0.143752 | 0.281767 | 0.615645 | H |
| 0.022449 | 0.275494 | 0.584988 | H |
| 0.061571 | 0.271972 | 0.494733 | H |
| 0.230947 | 0.859977 | 0.744054 | H |
| 0.211535 | 0.896216 | 0.824604 | H |
| 0.134868 | 0.828259 | 0.726377 | H |
| 0.133941 | 0.724036 | 0.795702 | H |
| 0.210485 | 0.723755 | 0.938774 | H |
| 0.228376 | 0.699797 | 0.850657 | H |
| 0.993109 | 0.588883 | 0.0421   | H |
| 0.015137 | 0.494207 | 0.110568 | H |
| 0.071343 | 0.575527 | 0.225281 | H |
| 0.101132 | 0.551179 | 0.140185 | H |
| 0.95088  | 0.629577 | 0.177112 | H |
| 0.980673 | 0.624303 | 0.247576 | H |
| 0.206336 | 0.914823 | 0.138252 | H |
| 0.217451 | 0.841296 | 0.23484  | H |
| 0.196342 | 0.718456 | 0.20773  | H |
| 0.184058 | 0.789091 | 0.110819 | H |
| 0.104109 | 0.738093 | 0.337754 | H |
| 0.116331 | 0.816927 | 0.358005 | H |
| 0.8686   | 0.673429 | 0.162564 | H |
| 0.851335 | 0.673962 | 0.262956 | H |
| 0.768056 | 0.886736 | 0.190557 | H |
| 0.753159 | 0.785568 | 0.227235 | H |
| 0.843858 | 0.795456 | 0.026097 | H |
| 0.78751  | 0.782399 | 0.077668 | H |



|          |          |          |   |
|----------|----------|----------|---|
| 0.131392 | 0.326671 | 0.83732  | H |
| 0.148695 | 0.326208 | 0.736891 | H |
| 0.23186  | 0.113291 | 0.809316 | H |
| 0.246784 | 0.214423 | 0.772701 | H |
| 0.155996 | 0.204497 | 0.973812 | H |
| 0.212369 | 0.217469 | 0.9224   | H |
| 0.026953 | 0.467235 | 0.757657 | H |
| 0.938827 | 0.513567 | 0.781374 | H |
| 0.949527 | 0.44041  | 0.978254 | H |
| 0.842549 | 0.263322 | 0.648072 | H |
| 0.855274 | 0.278616 | 0.813604 | H |
| 0.818705 | 0.069358 | 0.769904 | H |
| 0.217068 | 0.190556 | 0.718755 | H |
| 0.192787 | 0.118483 | 0.968772 | H |
| 0.187086 | 0.340435 | 0.782317 | H |
| 0.973015 | 0.5327   | 0.242249 | H |
| 0.050472 | 0.55964  | 0.021672 | H |
| 0.061169 | 0.486396 | 0.218594 | H |
| 0.815884 | 0.238945 | 0.274075 | H |
| 0.815857 | 0.067252 | 0.257087 | H |
| 0.819277 | 0.340473 | 0.072596 | H |
| 0.859019 | 0.819865 | 0.496701 | H |
| 0.872516 | 0.674001 | 0.480133 | H |
| 0.965539 | 0.815309 | 0.430721 | H |
| 0.812928 | 0.659579 | 0.21767  | H |
| 0.782884 | 0.809521 | 0.281107 | H |
| 0.80704  | 0.88144  | 0.031164 | H |
| 0.157514 | 0.736613 | 0.35183  | H |
| 0.181321 | 0.930626 | 0.229987 | H |
| 0.144717 | 0.721347 | 0.186383 | H |
| 0.12737  | 0.325867 | 0.519651 | H |
| 0.034397 | 0.183933 | 0.569597 | H |
| 0.140908 | 0.17971  | 0.503342 | H |
| 0.184126 | 0.760987 | 0.725917 | H |
| 0.180723 | 0.659568 | 0.927396 | H |
| 0.184134 | 0.932762 | 0.742772 | H |
| 0.944942 | 0.970777 | 0.637617 | H |
| 0.999505 | 0.744379 | 0.747517 | H |
| 0.91088  | 0.782544 | 0.757193 | H |
| 0.000325 | 0.25561  | 0.252363 | H |
| 0.055018 | 0.02927  | 0.362377 | H |
| 0.089005 | 0.217572 | 0.242782 | H |
| 0.492334 | 0.470695 | 0.408951 | H |

|          |          |          |   |
|----------|----------|----------|---|
| 0.507465 | 0.529073 | 0.591284 | H |
| 0.516405 | 0.391157 | 0.488602 | H |
| 0.483465 | 0.608645 | 0.51157  | H |
| 0.574705 | 0.24208  | 0.376985 | H |
| 0.425522 | 0.758095 | 0.623026 | H |
| 0.602958 | 0.314607 | 0.380489 | H |
| 0.397076 | 0.68578  | 0.619588 | H |
| 0.452056 | 0.35379  | 0.397873 | H |
| 0.54799  | 0.645655 | 0.60227  | H |
| 0.483608 | 0.266127 | 0.385149 | H |
| 0.516646 | 0.733445 | 0.615016 | H |
| 0.709161 | 0.473457 | 0.102738 | H |
| 0.290879 | 0.52643  | 0.897296 | H |
| 0.725719 | 0.539039 | 0.135994 | H |
| 0.274376 | 0.460806 | 0.864005 | H |
| 0.715017 | 0.670094 | 0.992964 | H |
| 0.28512  | 0.329691 | 0.007058 | H |
| 0.698113 | 0.60686  | 0.957087 | H |
| 0.301991 | 0.392887 | 0.043009 | H |
| 0.62334  | 0.708066 | 0.11224  | H |
| 0.376775 | 0.291898 | 0.887755 | H |
| 0.628331 | 0.625215 | 0.207819 | H |
| 0.37179  | 0.374779 | 0.792195 | H |
| 0.651017 | 0.558445 | 0.610554 | H |
| 0.34884  | 0.441454 | 0.389621 | H |
| 0.662909 | 0.659245 | 0.581351 | H |
| 0.336962 | 0.340688 | 0.418678 | H |
| 0.733757 | 0.460512 | 0.703133 | H |
| 0.266173 | 0.539597 | 0.296874 | H |
| 0.709622 | 0.448411 | 0.807548 | H |
| 0.290362 | 0.5517   | 0.192473 | H |
| 0.726804 | 0.607003 | 0.764109 | H |
| 0.273222 | 0.393247 | 0.235606 | H |
| 0.750502 | 0.616267 | 0.660924 | H |
| 0.249435 | 0.383858 | 0.338811 | H |
| 0.602563 | 0.873896 | 0.839948 | H |
| 0.397703 | 0.12712  | 0.159873 | H |
| 0.635669 | 0.872193 | 0.745176 | H |
| 0.364542 | 0.128943 | 0.254561 | H |
| 0.560183 | 0.975202 | 0.630526 | H |
| 0.439702 | 0.025104 | 0.369783 | H |
| 0.531313 | 0.894666 | 0.643725 | H |
| 0.468648 | 0.105414 | 0.356897 | H |

|          |          |          |   |
|----------|----------|----------|---|
| 0.48295  | 0.892108 | 0.797658 | H |
| 0.517255 | 0.107937 | 0.202887 | H |
| 0.509828 | 0.882719 | 0.873835 | H |
| 0.490424 | 0.117599 | 0.126533 | H |
| 0.294117 | 0.701135 | 0.954871 | H |
| 0.705983 | 0.298708 | 0.045173 | H |
| 0.274827 | 0.806542 | 0.905425 | H |
| 0.72525  | 0.193276 | 0.094583 | H |
| 0.373485 | 0.919076 | 0.887292 | H |
| 0.6265   | 0.080934 | 0.112693 | H |
| 0.372262 | 0.887175 | 0.810573 | H |
| 0.627767 | 0.112797 | 0.189413 | H |
| 0.280823 | 0.84822  | 0.022175 | H |
| 0.719215 | 0.151702 | 0.977751 | H |
| 0.300179 | 0.747181 | 0.083659 | H |
| 0.699864 | 0.252772 | 0.916319 | H |
| 0.400563 | 0.89027  | 0.059523 | H |
| 0.599321 | 0.109658 | 0.940596 | H |
| 0.423913 | 0.917801 | 0.11974  | H |
| 0.575954 | 0.082238 | 0.880314 | H |
| 0.361784 | 0.761378 | 0.217821 | H |
| 0.638196 | 0.238552 | 0.78224  | H |
| 0.396697 | 0.690426 | 0.281428 | H |
| 0.603304 | 0.309565 | 0.718618 | H |
| 0.512863 | 0.783839 | 0.139804 | H |
| 0.487095 | 0.216344 | 0.860168 | H |
| 0.477164 | 0.810111 | 0.221013 | H |
| 0.522776 | 0.19006  | 0.778952 | H |
| 0.397799 | 0.038189 | 0.254174 | H |
| 0.41031  | 0.114326 | 0.381892 | H |
| 0.487514 | 0.026749 | 0.219847 | H |
| 0.677141 | 0.069101 | 0.141311 | H |
| 0.680541 | 0.240165 | 0.148856 | H |
| 0.669942 | 0.169899 | 0.941834 | H |
| 0.602209 | 0.962752 | 0.745655 | H |
| 0.589655 | 0.886096 | 0.618278 | H |
| 0.512589 | 0.973515 | 0.780478 | H |
| 0.330073 | 0.830097 | 0.058152 | H |
| 0.322853 | 0.930788 | 0.858677 | H |
| 0.319553 | 0.759654 | 0.851191 | H |
| 0.290815 | 0.308848 | 0.319415 | H |
| 0.319779 | 0.57434  | 0.24757  | H |
| 0.293081 | 0.416054 | 0.428378 | H |

|          |          |          |   |
|----------|----------|----------|---|
| 0.316694 | 0.526551 | 0.798232 | H |
| 0.335414 | 0.302584 | 0.041025 | H |
| 0.324905 | 0.321851 | 0.85925  | H |
| 0.510438 | 0.294267 | 0.765287 | H |
| 0.54202  | 0.102642 | 0.965509 | H |
| 0.610589 | 0.204963 | 0.732475 | H |
| 0.449844 | 0.538278 | 0.599188 | H |
| 0.435608 | 0.742876 | 0.53013  | H |
| 0.523926 | 0.722118 | 0.52073  | H |
| 0.564485 | 0.25731  | 0.469906 | H |
| 0.549938 | 0.461774 | 0.401075 | H |
| 0.476256 | 0.27759  | 0.479375 | H |
| 0.706774 | 0.58385  | 0.571694 | H |
| 0.680168 | 0.42572  | 0.75254  | H |
| 0.709138 | 0.691293 | 0.68032  | H |
| 0.664734 | 0.697228 | 0.958961 | H |
| 0.675216 | 0.6781   | 0.140709 | H |
| 0.683395 | 0.473314 | 0.201828 | H |
| 0.489552 | 0.7059   | 0.234706 | H |
| 0.457849 | 0.897484 | 0.034483 | H |
| 0.389366 | 0.795036 | 0.267563 | H |

### POSCAR file of the $\text{Au}_{32}(\text{P}_3\text{H})_{12}\text{Cl}_8$ assembly system

```

1
7.193192 5.874932 29.470342
18.435348 0 0
8.46119 16.532558 0
Au Cl P H
64 16 24 72
direct
0.994584 0.057464 0.845555 Au
0.930632 0.128487 0.944796 Au
0.958646 0.259617 0.944672 Au
0.975635 0.226106 0.785664 Au
0.88611 0.167209 0.06982 Au
0.903281 0.092427 0.835366 Au
0.851217 0.050856 0.034735 Au
0.927272 0.963056 0.974162 Au
0.951097 0.796237 0.998257 Au
0.958552 0.946268 0.829015 Au
0.073429 0.037009 0.024622 Au
0.048643 0.203318 0.001863 Au

```

|          |          |          |    |
|----------|----------|----------|----|
| 0.042368 | 0.053901 | 0.169101 | Au |
| 0.971914 | 0.846872 | 0.100083 | Au |
| 0.935613 | 0.845751 | 0.24972  | Au |
| 0.875252 | 0.881186 | 0.131045 | Au |
| 0.919542 | 0.997707 | 0.115359 | Au |
| 0.02934  | 0.152255 | 0.898853 | Au |
| 0.065198 | 0.152898 | 0.749275 | Au |
| 0.126168 | 0.117085 | 0.865533 | Au |
| 0.081019 | 0.00044  | 0.884419 | Au |
| 0.020298 | 0.888526 | 0.936126 | Au |
| 0.057279 | 0.965485 | 0.772535 | Au |
| 0.980188 | 0.110037 | 0.062628 | Au |
| 0.943247 | 0.033976 | 0.226203 | Au |
| 0.006354 | 0.941322 | 0.154077 | Au |
| 0.070134 | 0.870971 | 0.054326 | Au |
| 0.041222 | 0.739939 | 0.053623 | Au |
| 0.025806 | 0.773045 | 0.213005 | Au |
| 0.114374 | 0.831668 | 0.929788 | Au |
| 0.097555 | 0.907181 | 0.163682 | Au |
| 0.149395 | 0.948375 | 0.96469  | Au |
| 0.570406 | 0.581957 | 0.947266 | Au |
| 0.42915  | 0.418813 | 0.052678 | Au |
| 0.484541 | 0.66962  | 0.950584 | Au |
| 0.515158 | 0.33071  | 0.04935  | Au |
| 0.420633 | 0.558715 | 0.081297 | Au |
| 0.578057 | 0.442329 | 0.919189 | Au |
| 0.477672 | 0.40323  | 0.171757 | Au |
| 0.521103 | 0.598918 | 0.827163 | Au |
| 0.568545 | 0.418106 | 0.08123  | Au |
| 0.430885 | 0.583045 | 0.91842  | Au |
| 0.509189 | 0.55734  | 0.101507 | Au |
| 0.490108 | 0.443885 | 0.898704 | Au |
| 0.647157 | 0.472475 | 0.96164  | Au |
| 0.352111 | 0.527859 | 0.037815 | Au |
| 0.613552 | 0.586782 | 0.796397 | Au |
| 0.385404 | 0.41401  | 0.203159 | Au |
| 0.554104 | 0.729307 | 0.808377 | Au |
| 0.445718 | 0.271273 | 0.191394 | Au |
| 0.455811 | 0.740493 | 0.808167 | Au |
| 0.543061 | 0.261623 | 0.192464 | Au |
| 0.394968 | 0.717046 | 0.959198 | Au |
| 0.604572 | 0.283639 | 0.0406   | Au |
| 0.439072 | 0.685123 | 0.098767 | Au |

|          |          |          |    |
|----------|----------|----------|----|
| 0.560219 | 0.31625  | 0.900192 | Au |
| 0.549869 | 0.700018 | 0.004806 | Au |
| 0.450063 | 0.300256 | 0.995133 | Au |
| 0.434559 | 0.526636 | 0.230198 | Au |
| 0.564843 | 0.475417 | 0.769633 | Au |
| 0.599733 | 0.538202 | 0.093798 | Au |
| 0.399546 | 0.46195  | 0.907218 | Au |
| 0.545076 | 0.425707 | 0.230941 | Au |
| 0.453966 | 0.573678 | 0.76906  | Au |
| 0.787625 | 0.115157 | 0.977086 | Cl |
| 0.928091 | 0.331644 | 0.708191 | Cl |
| 0.905489 | 0.716097 | 0.992461 | Cl |
| 0.089748 | 0.291169 | 0.006551 | Cl |
| 0.097835 | 0.952705 | 0.652266 | Cl |
| 0.904805 | 0.047373 | 0.346811 | Cl |
| 0.213221 | 0.885421 | 0.021959 | Cl |
| 0.072124 | 0.664755 | 0.290592 | Cl |
| 0.411256 | 0.486688 | 0.370594 | Cl |
| 0.588467 | 0.513929 | 0.629438 | Cl |
| 0.724315 | 0.440664 | 0.96446  | Cl |
| 0.274947 | 0.56001  | 0.034792 | Cl |
| 0.566187 | 0.82117  | 0.996294 | Cl |
| 0.434272 | 0.178885 | 0.003218 | Cl |
| 0.443264 | 0.827795 | 0.678028 | Cl |
| 0.556427 | 0.173805 | 0.321958 | Cl |
| 0.838292 | 0.201081 | 0.169837 | P  |
| 0.949787 | 0.396901 | 0.872033 | P  |
| 0.848408 | 0.191946 | 0.774951 | P  |
| 0.945467 | 0.876748 | 0.765951 | P  |
| 0.050742 | 0.120305 | 0.239218 | P  |
| 0.89878  | 0.828988 | 0.378556 | P  |
| 0.102401 | 0.171146 | 0.620149 | P  |
| 0.161777 | 0.797505 | 0.829668 | P  |
| 0.053507 | 0.603984 | 0.131284 | P  |
| 0.15263  | 0.807987 | 0.223944 | P  |
| 0.838548 | 0.77639  | 0.156027 | P  |
| 0.163094 | 0.221273 | 0.841824 | P  |
| 0.529605 | 0.359307 | 0.371696 | P  |
| 0.469996 | 0.641577 | 0.62839  | P  |
| 0.664719 | 0.569733 | 0.0982   | P  |
| 0.334383 | 0.431492 | 0.902129 | P  |
| 0.675256 | 0.580619 | 0.699772 | P  |
| 0.323833 | 0.41935  | 0.300227 | P  |

|          |          |          |   |
|----------|----------|----------|---|
| 0.569925 | 0.856956 | 0.771133 | P |
| 0.430082 | 0.1436   | 0.228138 | P |
| 0.31991  | 0.764658 | 0.974472 | P |
| 0.679612 | 0.235811 | 0.025582 | P |
| 0.443141 | 0.800634 | 0.109526 | P |
| 0.556826 | 0.200449 | 0.88947  | P |
| 0.919733 | 0.771081 | 0.445531 | H |
| 0.854835 | 0.803338 | 0.409574 | H |
| 0.891079 | 0.900935 | 0.393385 | H |
| 0.19427  | 0.832357 | 0.217864 | H |
| 0.16881  | 0.74601  | 0.19472  | H |
| 0.142156 | 0.758887 | 0.310081 | H |
| 0.057474 | 0.547753 | 0.096345 | H |
| 0.020339 | 0.569679 | 0.203185 | H |
| 0.092741 | 0.5736   | 0.167009 | H |
| 0.207781 | 0.811844 | 0.80822  | H |
| 0.14948  | 0.838973 | 0.750557 | H |
| 0.169033 | 0.714657 | 0.839979 | H |
| 0.209411 | 0.202651 | 0.848983 | H |
| 0.144263 | 0.261291 | 0.896025 | H |
| 0.167075 | 0.290023 | 0.763902 | H |
| 0.082031 | 0.230607 | 0.553007 | H |
| 0.10989  | 0.100092 | 0.603908 | H |
| 0.14658  | 0.195738 | 0.590634 | H |
| 0.982725 | 0.826447 | 0.740292 | H |
| 0.928777 | 0.920189 | 0.691307 | H |
| 0.914129 | 0.818536 | 0.813097 | H |
| 0.858619 | 0.240427 | 0.688674 | H |
| 0.832695 | 0.254215 | 0.803809 | H |
| 0.806581 | 0.167444 | 0.782185 | H |
| 0.907428 | 0.436053 | 0.848423 | H |
| 0.978799 | 0.429388 | 0.79384  | H |
| 0.955959 | 0.448187 | 0.905946 | H |
| 0.799178 | 0.159841 | 0.211653 | H |
| 0.816966 | 0.283143 | 0.149769 | H |
| 0.85611  | 0.185739 | 0.239082 | H |
| 0.825876 | 0.778152 | 0.087414 | H |
| 0.796697 | 0.763709 | 0.213682 | H |
| 0.86123  | 0.695164 | 0.18605  | H |
| 0.036857 | 0.206223 | 0.207296 | H |
| 0.094806 | 0.119598 | 0.249174 | H |
| 0.027404 | 0.096696 | 0.322433 | H |
| 0.513686 | 0.615472 | 0.590849 | H |

|          |          |          |   |
|----------|----------|----------|---|
| 0.470816 | 0.727239 | 0.59921  | H |
| 0.442675 | 0.641959 | 0.577902 | H |
| 0.294231 | 0.461159 | 0.945555 | H |
| 0.328396 | 0.347473 | 0.934445 | H |
| 0.321821 | 0.459438 | 0.824765 | H |
| 0.303838 | 0.824505 | 0.902626 | H |
| 0.299989 | 0.804774 | 0.027547 | H |
| 0.290315 | 0.704008 | 0.003119 | H |
| 0.414027 | 0.873608 | 0.073214 | H |
| 0.486481 | 0.829833 | 0.074614 | H |
| 0.435135 | 0.798064 | 0.189676 | H |
| 0.292864 | 0.36058  | 0.333074 | H |
| 0.292142 | 0.49169  | 0.280063 | H |
| 0.331864 | 0.414019 | 0.374319 | H |
| 0.528786 | 0.273489 | 0.402252 | H |
| 0.486123 | 0.385805 | 0.409519 | H |
| 0.557384 | 0.360081 | 0.420832 | H |
| 0.699578 | 0.19552  | 0.972666 | H |
| 0.695661 | 0.176148 | 0.097516 | H |
| 0.70919  | 0.29653  | 0.996767 | H |
| 0.513731 | 0.170355 | 0.924843 | H |
| 0.586391 | 0.12812  | 0.925562 | H |
| 0.564832 | 0.202811 | 0.809399 | H |
| 0.70671  | 0.507962 | 0.720063 | H |
| 0.706471 | 0.638961 | 0.667011 | H |
| 0.667174 | 0.586121 | 0.625641 | H |
| 0.615943 | 0.871183 | 0.749947 | H |
| 0.553575 | 0.889517 | 0.831231 | H |
| 0.5543   | 0.922744 | 0.7015   | H |
| 0.670156 | 0.654019 | 0.065801 | H |
| 0.704949 | 0.54079  | 0.054347 | H |
| 0.677515 | 0.542157 | 0.175299 | H |
| 0.446431 | 0.111756 | 0.167465 | H |
| 0.384108 | 0.129128 | 0.249345 | H |
| 0.44588  | 0.077511 | 0.297406 | H |

POSCAR file of the Au<sub>32</sub>H<sub>12</sub>Cl<sub>8</sub> assembly system

|    |           |            |            |
|----|-----------|------------|------------|
| 1  |           |            |            |
|    | -0.427731 | -7.298516  | -25.131436 |
|    | 8.482607  | -14.660973 | 0          |
|    | -8.013962 | -14.660973 | 0          |
| Au | Cl        | H          |            |



|        | 64        | 16       | 24        |
|--------|-----------|----------|-----------|
| Direct |           |          |           |
|        | -0.018457 | 0.123393 | -0.911408 |
|        | -0.046048 | 0.962378 | -1.878727 |
|        | -0.011542 | 0.789782 | -1.741188 |
|        | -0.019094 | 0.876115 | -1.632132 |
|        | -0.123357 | 0.847908 | -1.809461 |
|        | -0.128485 | 0.173828 | -0.882746 |
|        | -0.144155 | 0.039154 | -0.930749 |
|        | -0.050851 | 0.12312  | -1.065449 |
|        | -0.043481 | 0.371231 | -1.221426 |
|        | -0.068667 | 0.288806 | -1.036291 |
|        | -0.949374 | 0.871791 | -0.933007 |
|        | -0.953651 | 0.629    | -0.778941 |
|        | -0.931197 | 0.710428 | -0.963993 |
|        | -0.040143 | 0.046363 | -0.192033 |
|        | -0.036901 | 0.912446 | -1.241972 |
|        | -0.137651 | 0.106557 | -0.121414 |
|        | -0.078166 | 0.940535 | -1.008611 |
|        | -0.961382 | 0.951746 | -1.806322 |
|        | -0.967665 | 0.087231 | -0.757058 |
|        | -0.864554 | 0.888786 | -1.873945 |
|        | -0.92336  | 0.055468 | -0.990193 |
|        | -0.969892 | 0.225262 | -1.116235 |
|        | -0.929689 | 0.201896 | -0.933241 |
|        | -0.030928 | 0.771124 | -0.882655 |
|        | -0.071717 | 0.790919 | -1.066261 |
|        | -0.984871 | 0.871875 | -1.08933  |
|        | -0.954127 | 0.029601 | -0.118789 |
|        | -0.986947 | 0.204115 | -0.256792 |
|        | -0.983769 | 0.121547 | -0.367265 |
|        | -0.877902 | 0.146677 | -0.19007  |
|        | -0.874651 | 0.830217 | -1.120063 |
|        | -0.855303 | 0.957065 | -1.065098 |
|        | -0.393168 | 0.880563 | -1.433447 |
|        | -0.606882 | 0.130104 | -0.60883  |
|        | -0.495582 | 0.9059   | -1.33638  |
|        | -0.498524 | 0.130394 | -0.678619 |
|        | -0.538866 | 0.964825 | -1.503665 |
|        | -0.457797 | 0.055665 | -0.50943  |
|        | -0.520833 | 0.857998 | -1.586481 |
|        | -0.494318 | 0.129747 | -0.381465 |
|        | -0.432046 | 0.941361 | -1.594883 |

|           |          |           |
|-----------|----------|-----------|
| -0.575804 | 0.081385 | -0.427471 |
| -0.475538 | 0.790072 | -1.417868 |
| -0.52172  | 0.229912 | -0.580739 |
| -0.320602 | 0.969543 | -1.607926 |
| -0.678942 | 0.046861 | -0.421583 |
| -0.396764 | 0.037924 | -0.388156 |
| -0.631487 | 0.961208 | -1.557415 |
| -0.377686 | 0.856732 | -1.265777 |
| -0.562252 | 0.038878 | -0.713418 |
| -0.557916 | 0.992123 | -1.244565 |
| -0.459942 | 0.025978 | -0.779722 |
| -0.605912 | 0.907367 | -1.311416 |
| -0.391868 | 0.106227 | -0.704253 |
| -0.548624 | 0.738195 | -1.23105  |
| -0.428021 | 0.277942 | -0.73015  |
| -0.429637 | 0.733664 | -1.260445 |
| -0.572082 | 0.295897 | -0.731518 |
| -0.587615 | 0.806431 | -1.417855 |
| -0.420227 | 0.209151 | -0.534463 |
| -0.339167 | 0.773142 | -1.528746 |
| -0.630679 | 0.254292 | -0.548963 |
| -0.42409  | 0.76242  | -1.579434 |
| -0.581357 | 0.255327 | -0.424303 |
| -0.201754 | 0.093115 | -0.825388 |
| -0.007645 | 0.990484 | -1.601949 |
| -0.009197 | 0.382065 | -1.366258 |
| -0.986842 | 0.612826 | -0.631906 |
| -0.908783 | 0.300976 | -1.093838 |
| -0.089604 | 0.69156  | -0.905066 |
| -0.79741  | 0.898212 | -1.165713 |
| -0.000265 | 0.011633 | -0.399035 |
| -0.632057 | 0.680349 | -1.326162 |
| -0.419775 | 0.367716 | -0.665233 |
| -0.276095 | 0.82898  | -1.498859 |
| -0.719062 | 0.198743 | -0.513593 |
| -0.483306 | 0.607205 | -1.184885 |
| -0.56502  | 0.428209 | -0.870621 |
| -0.571652 | 0.99104  | -1.105845 |
| -0.371127 | 0.988782 | -1.814443 |
| -0.163885 | 0.78352  | -1.723089 |
| -0.032775 | 0.7832   | -1.627218 |
| -0.09036  | 0.255297 | -0.911695 |
| -0.075956 | 0.401187 | -1.137774 |

|           |          |           |
|-----------|----------|-----------|
| -0.919586 | 0.600268 | -0.863397 |
| -0.071347 | 0.816702 | -1.180649 |
| -0.930317 | 0.178897 | -0.819491 |
| -0.838741 | 0.212719 | -0.277879 |
| -0.96593  | 0.210669 | -0.370642 |
| -0.921498 | 0.763568 | -1.096153 |
| -0.167973 | 0.183302 | -0.206631 |
| -0.83524  | 0.812328 | -1.787235 |
| -0.481452 | 0.784956 | -1.62893  |
| -0.535884 | 0.210645 | -0.346512 |
| -0.360987 | 0.701734 | -1.552589 |
| -0.634656 | 0.314289 | -0.485824 |
| -0.356392 | 0.961372 | -1.2996   |
| -0.677479 | 0.018577 | -0.620406 |
| -0.38217  | 0.73794  | -1.204008 |
| -0.52094  | 0.070064 | -0.82118  |
| -0.671056 | 0.933151 | -1.339996 |
| -0.322887 | 0.081518 | -0.702528 |
| -0.609506 | 0.795271 | -1.211313 |
| -0.419465 | 0.223336 | -0.793165 |

## References

1. Kenzler S, Fetzer F, Schrenk C, Pollard N, Frojd AR, Clayborne AZ, Schnepf A. Synthesis and Characterization of Three Multi-Shell Metalloid Gold Clusters Au(32) (R(3)P)(12) Cl(8). *Angew Chem Int Ed Engl.* 2019;**58**(18):5902-5.
2. Kenzler S, Fetzer F, Schrenk C, Pollard N, Frojd AR, Clayborne AZ, Schnepf A. Synthese und Charakterisierung von drei mehrschaligen metalloiden Goldclustern der Zusammensetzung Au<sub>32</sub>(R<sub>3</sub>P)<sub>12</sub>Cl<sub>8</sub>. *Angewandte Chemie.* 2019;**131**(18):5962-6.
3. Kresse G, Hafner J. Ab initio molecular-dynamics simulation of the liquid-metal-amorphous-semiconductor transition in germanium. *Phys Rev B Condens Matter.* 1994;**49**(20):14251-69.
4. Kresse G, Furthmüller J. Efficiency of ab-initio total energy calculations for metals and semiconductors using a plane-wave basis set. *Computational Materials Science.* 1996;**6**(1):15-50.
5. Kresse G, Hafner J. Ab initio molecular dynamics for liquid metals. *Phys Rev B Condens Matter.* 1993;**47**(1):558-61.
6. Furthmüller J, Hafner J, Kresse G. Dimer reconstruction and electronic surface states on clean and hydrogenated diamond (100) surfaces. *Phys Rev B Condens Matter.* 1996;**53**(11):7334-51.
7. Frisch MJ, Trucks GW, Schlegel HB, Scuseria GE, Robb MA, Cheeseman JR, Scalmani G, Barone V, Petersson GA, Nakatsuji H, Li X, Caricato M, Marenich A, Bloino J, Janesko BG, Gomperts R, Mennucci B, Hratchian HP, Ortiz JV, Izmaylov AF, Sonnenberg JL, Williams-Young D, Ding F, Lipparini F, Egidi F, Goings J, Peng B, Petrone A, Henderson T, Ranasinghe D, Zakrzewski VG, Gao J, Rega N, Zheng G, Liang W, Hada M, Ehara M, Toyota K, Fukuda R, Hasegawa J, Ishida M, Nakajima T, Honda Y, Kitao O, Nakai

- H, Vreven T, Throssell K, Montgomery JA, Peralta J, J. E., Ogliaro F, Bearpark M, Heyd JJ, Brothers E, Kudin KN, Staroverov VN, Keith T, Kobayashi R, Normand J, Raghavachari K, Rendell A, Burant JC, Iyengar SS, Tomasi J, Cossi M, Millam JM, Klene M, Adamo C, Cammi R, Ochterski JW, Martin RL, Morokuma K, Farkas O, Foresman JB, Fox DJ. Gaussian 16, Revision C01. Wallingford CT, 2016: Gaussian, Inc.
8. Hay PJ, Wadt WR. Ab initio effective core potentials for molecular calculations. Potentials for the transition metal atoms Sc to Hg. *The Journal of Chemical Physics*. 1985;**82**(1):270-83.
  9. Hay PJ, Wadt WR. Ab initio effective core potentials for molecular calculations. Potentials for K to Au including the outermost core orbitals. *The Journal of Chemical Physics*. 1985;**82**(1):299-310.
  10. Becke AD, Edgecombe KE. A simple measure of electron localization in atomic and molecular systems. *The Journal of Chemical Physics*. 1990;**92**(9):5397-403.
  11. Bader RF. Definition of molecular structure: by choice or by appeal to observation? *J Phys Chem A*. 2010;**114**(28):7431-44.
  12. Bader RF. Bond paths are not chemical bonds. *J Phys Chem A*. 2009;**113**(38):10391-6.
  13. Otero-de-la-Roza A, Johnson ER, Luaña V. Critic2: A program for real-space analysis of quantum chemical interactions in solids. *Computer Physics Communications*. 2014;**185**(3):1007-18.
  14. IST Chemistry Webbook, NIST Standard Reference Database Number 69. National Institute of Standards and Technology: Gaithersburg, MD: Linstrom, P. J., Mallard, W. G.; 2023.
